# Supplementary material for: Investigating the Molecular Mechanism of Quercetin Protecting against Podocyte Injury to Attenuate Diabetic Nephropathy through Network Pharmacology, MicroarrayData Analysis, and Molecular Docking
Source: Evid Based Complement Alternat Med. 2022 May 16;2022:7291434. doi: 10.1155/2022/7291434 (PMC9126727; doi:10.1155/2022/7291434)
Supplement: Supplementary Materials — Supplementary Table 1: 355 targets of QUE. Supplementary Table 2: 4895 human genes related to DN. Supplementary Table 3: 848 human genes associated with podocyte injury. Supplementary Table 4: 42 mapping targets. Supplementary Table 5: specific analytical parameters of 41 candidate targets. Supplementary Table 6: 118 signaling pathways from R project. Supplementary Table 7: 52 biological functions from R project. [file 7291434.f1.zip]

Archive with 7 entries (7 files):
- 7291434.f1/Supplementary Table 1-Targets of QUE.txt
- 7291434.f1/Supplementary Table 2-Genes of DN.txt
- 7291434.f1/Supplementary Table 3-Genes of podocyte injury.txt
- 7291434.f1/Supplementary Table 4-Mapping targets.txt
- 7291434.f1/Supplementary Table 5-Candidate targets.txt
- 7291434.f1/Supplementary Table 6-118 signaling pathways from R project.txt
- 7291434.f1/Supplementary Table 7-52 results of GO term from R project.txt
