# Supplementary material for: Investigating the Molecular Mechanism of Quercetin Protecting against Podocyte Injury to Attenuate Diabetic Nephropathy through Network Pharmacology, MicroarrayData Analysis, and Molecular Docking
Source: Evid Based Complement Alternat Med. 2022 May 16;2022:7291434. doi: 10.1155/2022/7291434 (PMC9126727; doi:10.1155/2022/7291434)
Supplement: Supplementary Materials — Supplementary Table 1: 355 targets of QUE. Supplementary Table 2: 4895 human genes related to DN. Supplementary Table 3: 848 human genes associated with podocyte injury. Supplementary Table 4: 42 mapping targets. Supplementary Table 5: specific analytical parameters of 41 candidate targets. Supplementary Table 6: 118 signaling pathways from R project. Supplementary Table 7: 52 biological functions from R project. [file 7291434.f1.zip › 7291434.f1/Supplementary Table 1-Targets of QUE.txt]

Target	Uniprot ID	Description	Source
HSD3B2	P26439	3 beta-hydroxysteroid dehydrogenase/Delta 5-->4-isomerase type 2	TCMSP
MMP2	P08253	72 kDa type IV collagenase	TCMSP
HSPA5	P11021	78 kDa glucose-regulated protein	TCMSP
ACHE	P22303	Acetylcholinesterase	TCMSP
PRKAA1	Q13131	Acetyl-CoA carboxylase 1	TCMSP
AHSA1	O95433	Activator of 90 kDa heat shock protein ATPase homolog 1	TCMSP
P15121	AKR1B1	Aldose reductase	TCMSP
MAOB	P27338	Amine oxidase [flavin-containing] B	TCMSP
AR	P10275	Androgen receptor	TCMSP
BAX	Q07812	Apoptosis regulator BAX	TCMSP
P10415	BCL2	Apoptosis regulator Bcl-2	TCMSP
P09917	ALOX5	Arachidonate 5-lipoxygenase	TCMSP
P35869	AHR	Aryl hydrocarbon receptor	TCMSP
Q9UNQ0	ABCG2	ATP-binding cassette sub-family G member 2	TCMSP
BIRC5	O15392	Baculoviral IAP repeat-containing protein 5	TCMSP
BCL2L1	Q07817	Bcl-2-like protein 1	TCMSP
ADRB2	P07550	Beta-2 adrenergic receptor	TCMSP
CASP3	P42574	Caspase-3	TCMSP
CASP8	Q14790	Caspase-8	TCMSP
CASP9	P55211	Caspase-9	TCMSP
CTSD	P07339	Cathepsin D	TCMSP
CAV1	Q03135	Caveolin-1	TCMSP
CCL2	P13500	C-C motif chemokine 2	TCMSP
CD40LG	P29965	CD40 ligand	TCMSP
CDK1	P06493	Cell division control protein 2 homolog	TCMSP
TP53	P04637	Cellular tumor antigen p53	TCMSP
CLDN4	O14493	Claudin-4	TCMSP
F7	P08709	Coagulation factor VII	TCMSP
F9	P00740	Coagulation factor Xa	TCMSP
COL1A1	P02452	Collagen alpha-1(I) chain	TCMSP
COL3A1	P02461	Collagen alpha-1(III) chain	TCMSP
CRP	P02741	C-reactive protein	TCMSP
CXCL10	P02778	C-X-C motif chemokine 10	TCMSP
CDKN1A	P38936	Cyclin-dependent kinase inhibitor 1	TCMSP
CYP1A1	P04798	Cytochrome P450 1A1	TCMSP
CYP1A2	P05177	Cytochrome P450 1A2	TCMSP
CYP1B1	Q16678	Cytochrome P450 1B1	TCMSP
CYP3A4	P08684	Cytochrome P450 3A4	TCMSP
DCAF5	Q96JK2	DDB1- and CUL4-associated factor 5	TCMSP
DPP4	P27487	Dipeptidyl peptidase IV	TCMSP
TOP2A	P11388	DNA gyrase subunit B	TCMSP
TOP1	P11387	DNA topoisomerase 1	TCMSP
TOP1MT	Q969P6	DNA topoisomerase 2-alpha	TCMSP
TOP2B	Q02880	DNA topoisomerase II	TCMSP
DUOX2	Q9NRD8	Dual oxidase 2	TCMSP
GRB7	Q14451	Epidermal growth factor receptor	TCMSP
SELE	P16581	E-selectin	TCMSP
SULT1E1	P49888	Estrogen sulfotransferase	TCMSP
ELK1	P19419	ETS domain-containing protein Elk-1	TCMSP
EIF6	P56537	Eukaryotic translation initiation factor 6	TCMSP
CCND1	P24385	G1/S-specific cyclin-D1	TCMSP
CCNB1	P14635	G2/mitotic-specific cyclin-B1	TCMSP
GABRA1	P14867	Gamma-aminobutyric acid receptor subunit alpha-1	TCMSP
GJA1	P17302	Gap junction alpha-1 protein	TCMSP
GSTM1	P09488	Glutathione S-transferase Mu 1	TCMSP
GSTM2	P28161	Glutathione S-transferase Mu 2	TCMSP
GSTP1	P09211	Glutathione S-transferase P	TCMSP
HSF1	Q00613	Heat shock factor protein 1	TCMSP
HSPB1	P04792	Heat shock protein beta-1	TCMSP
HSP 90	P08238	Heat shock protein HSP 90	TCMSP
HMOX1	P09601	Heme oxygenase 1	TCMSP
HK2	P52789	Hexokinase-2	TCMSP
NKX3-1	Q99801	Homeobox protein Nkx-3.1	TCMSP
HAS2	Q92819	Hyaluronan synthase 2	TCMSP
HIF1A	Q16665	Hypoxia-inducible factor 1-alpha	TCMSP
CHUK	O15111	Inhibitor of nuclear factor kappa-B kinase subunit alpha	TCMSP
INSR	P06213	Insulin receptor	TCMSP
IGF2	P01344	Insulin-like growth factor II	TCMSP
IGFBP3	P17936	Insulin-like growth factor-binding protein 3	TCMSP
ICAM1	P05362	Intercellular adhesion molecule 1	TCMSP
IFNG	P01579	Interferon gamma	TCMSP
IRF1	P10914	Interferon regulatory factor 1	TCMSP
IL1A	P01583	Interleukin-1 alpha	TCMSP
IL10	P22301	Interleukin-10	TCMSP
IL2	P60568	Interleukin-2	TCMSP
IL6	P05231	Interleukin-6	TCMSP
CXCL8	P10145	Interleukin-8	TCMSP
MMP1	P03956	Interstitial collagenase	TCMSP
MGAM	O43451	Maltase-glucoamylase, intestinal	TCMSP
MMP9	P14780	Matrix metalloproteinase-9	TCMSP
MAPK1	P28482	Mitogen-activated protein kinase 1	TCMSP
PRKACA	P17612	mRNA of PKA Catalytic Subunit C-alpha	TCMSP
MYC	P01106	Myc proto-oncogene protein	TCMSP
MPO	P05164	Myeloperoxidase	TCMSP
NQO1	P15559	NAD(P)H dehydrogenase [quinone] 1	TCMSP
POR	P16435	NADPH--cytochrome P450 reductase	TCMSP
NCF1	P14598	Neutrophil cytosol factor 1	TCMSP
NFKBIA	P25963	NF-kappa-B inhibitor alpha	TCMSP
NOS3	P29474	Nitric oxide synthase, endothelial	TCMSP
NFE2L2	Q16236	Nuclear factor erythroid 2-related factor 2	TCMSP
NCoA-2	Q15596	Nuclear receptor coactivator 2	TCMSP
NR1I2	O75469	Nuclear receptor subfamily 1 group I member 2	TCMSP
NR1I3	Q14994	Nuclear receptor subfamily 1 group I member 3	TCMSP
ODC1	P11926	Ornithine decarboxylase	TCMSP
SPP1	P10451	Osteopontin	TCMSP
PRXC1A	P00433	Peroxidase C1A	TCMSP
PPARG	P37231	Peroxisome proliferator activated receptor gamma	TCMSP
PPARA	Q07869	Peroxisome proliferator-activated receptor alpha	TCMSP
PPARD	Q03181	Peroxisome proliferator-activated receptor delta	TCMSP
PTEN	P60484	Phosphatidylinositol-3,4,5-trisphosphate 3-phosphatase and dual-specificity protein phosphatase PTEN	TCMSP
PIK3CG	P48736	Phosphatidylinositol-4,5-bisphosphate 3-kinase catalytic subunit, gamma isoform	TCMSP
SERPINE1	P05121	Plasminogen activator inhibitor 1	TCMSP
PARP1	P09874	Poly [ADP-ribose] polymerase 1	TCMSP
KCNH2	Q12809	Potassium voltage-gated channel subfamily H member 2	TCMSP
HERC5	Q9UII4	Probable E3 ubiquitin-protein ligase HERC5	TCMSP
PCOLCE	Q15113	Procollagen C-endopeptidase enhancer 1	TCMSP
EGF	P01133	Pro-epidermal growth factor	TCMSP
PTGER3	P43115	Prostaglandin E2 receptor EP3 subtype	TCMSP
PTGS1	P23219	Prostaglandin G/H synthase 1	TCMSP
PTGS2	P35354	Prostaglandin G/H synthase 2	TCMSP
ACPP	P15309	Prostatic acid phosphatase	TCMSP
RUNX1T1	Q06455	Protein CBFA2T1	TCMSP
PRKCD	Q05655	Protein kinase C alpha type	TCMSP
FOS	P01100	Proto-oncogene c-Fos	TCMSP
NPEPPS	P55786	Puromycin-sensitive aminopeptidase	TCMSP
AKT1	P31749	RAC-alpha serine/threonine-protein kinase	TCMSP
RAF1	P04049	RAF proto-oncogene serine/threonine-protein kinase	TCMSP
RASSF1	Q9NS23	Ras association domain-containing protein 1	TCMSP
RASA1	P20936	Ras GTPase-activating protein 1	TCMSP
ERBB2	P04626	Receptor tyrosine-protein kinase erbB-2	TCMSP
ERBB3	P21860	Receptor tyrosine-protein kinase erbB-3	TCMSP
RB1	P06400	Retinoblastoma-associated protein	TCMSP
RXRA	P19793	Retinoic acid receptor RXR-alpha	TCMSP
RUNX2	Q13950	Runt-related transcription factor 2	TCMSP
CHEK2	O96017	Serine/threonine-protein kinase Chk2	TCMSP
PON1	P27169	Serum paraoxonase/arylesterase 1	TCMSP
STAT1	P42224	Signal transducer and activator of transcription 1-alpha/beta	TCMSP
SCN5A	Q14524	Sodium channel protein type 5 subunit alpha	TCMSP
SLC2A4	P14672	Solute carrier family 2, facilitated glucose transporter member 4	TCMSP
MMP3	P08254	Stromelysin-1	TCMSP
SOD1	P00441	Superoxide dismutase [Cu-Zn]	TCMSP
PSMD3	O43242	26S proteasome non-ATPase regulatory subunit 3	TCMSP
F2	P00734	Thrombin	TCMSP
THBD	P07204	Thrombomodulin	TCMSP
F3	P13726	Tissue factor	TCMSP
PLAT	P00750	Tissue-type plasminogen activator	TCMSP
JUN	P05412	Transcription factor AP-1	TCMSP
E2F1	Q01094	Transcription factor E2F1	TCMSP
E2F2	Q14209	Transcription factor E2F2	TCMSP
RELA	Q04206	Transcription factor p65	TCMSP
TGFB1	P01137	Transforming growth factor beta-1	TCMSP
PRSS1	P07477	Trypsin-1	TCMSP
TNF	P01375	Tumor necrosis factor	TCMSP
DIO1	P49895	Type I iodothyronine deiodinase	TCMSP
PLAU	P00749	Urokinase-type plasminogen activator	TCMSP
VCAM1	P19320	Vascular cell adhesion protein 1	TCMSP
VEGFA	P15692	Vascular endothelial growth factor A	TCMSP
XDH	P47989	Xanthine dehydrogenase/oxidase	TCMSP
NOX4	Q9NPH5	NADPH oxidase 4	SwissTargetPrediction
AVPR2	P30518	Vasopressin V2 receptor	SwissTargetPrediction
AKR1B1	P15121	Aldose reductase	SwissTargetPrediction
XDH	P47989	Xanthine dehydrogenase	SwissTargetPrediction
MAOA	P21397	Monoamine oxidase A	SwissTargetPrediction
IGF1R	P08069	Insulin-like growth factor I receptor	SwissTargetPrediction
FLT3	P36888	Tyrosine-protein kinase receptor FLT3	SwissTargetPrediction
CYP19A1	P11511	Cytochrome P450 19A1	SwissTargetPrediction
EGFR	P00533	Epidermal growth factor receptor erbB1	SwissTargetPrediction
CA2	P00918	Carbonic anhydrase II	SwissTargetPrediction
PIM1	P11309	Serine/threonine-protein kinase PIM1	SwissTargetPrediction
ALOX5	P09917	Arachidonate 5-lipoxygenase	SwissTargetPrediction
AURKB	Q96GD4	Serine/threonine-protein kinase Aurora-B	SwissTargetPrediction
DRD4	P21917	Dopamine D4 receptor	SwissTargetPrediction
CA7	P43166	Carbonic anhydrase VII	SwissTargetPrediction
GLO1	Q04760	Glyoxalase I	SwissTargetPrediction
PIK3R1	P27986	PI3-kinase p85-alpha subunit	SwissTargetPrediction
ADORA2A	P29274	Adenosine A2a receptor (by homology)	SwissTargetPrediction
DAPK1	P53355	Death-associated protein kinase 1	SwissTargetPrediction
PYGL	P06737	Liver glycogen phosphorylase	SwissTargetPrediction
CA1	P00915	Carbonic anhydrase I	SwissTargetPrediction
GSK3B	P49841	Glycogen synthase kinase-3 beta	SwissTargetPrediction
SRC	P12931	Tyrosine-protein kinase SRC	SwissTargetPrediction
PTK2	Q05397	Focal adhesion kinase 1	SwissTargetPrediction
HSD17B2	P37059	Estradiol 17-beta-dehydrogenase 2	SwissTargetPrediction
KDR	P35968	Vascular endothelial growth factor receptor 2	SwissTargetPrediction
MMP13	P45452	Matrix metalloproteinase 13	SwissTargetPrediction
MMP3	P08254	Matrix metalloproteinase 3	SwissTargetPrediction
CA3	P07451	Carbonic anhydrase III	SwissTargetPrediction
ALOX15	P16050	Arachidonate 15-lipoxygenase	SwissTargetPrediction
ABCC1	P33527	Multidrug resistance-associated protein 1	SwissTargetPrediction
PLK1	P53350	Serine/threonine-protein kinase PLK1	SwissTargetPrediction
CA6	P23280	Carbonic anhydrase VI	SwissTargetPrediction
CDK1	P06493	Cyclin-dependent kinase 1	SwissTargetPrediction
MMP9	P14780	Matrix metalloproteinase 9	SwissTargetPrediction
CA12	O43570	Carbonic anhydrase XII	SwissTargetPrediction
MMP2	P08253	Matrix metalloproteinase 2	SwissTargetPrediction
PKN1	Q16512	Protein kinase N1	SwissTargetPrediction
CA14	Q9ULX7	Carbonic anhydrase XIV	SwissTargetPrediction
CA9	Q16790	Carbonic anhydrase IX	SwissTargetPrediction
CSNK2A1	P68400	Casein kinase II alpha	SwissTargetPrediction
ALOX12	P18054	Arachidonate 12-lipoxygenase	SwissTargetPrediction
MET	P08581	Hepatocyte growth factor receptor	SwissTargetPrediction
CA4	P22748	Carbonic anhydrase IV	SwissTargetPrediction
NEK2	P51955	Serine/threonine-protein kinase NEK2	SwissTargetPrediction
CXCR1	P25024	Interleukin-8 receptor A	SwissTargetPrediction
CAMK2B	Q13554	CaM kinase II beta	SwissTargetPrediction
ALK	Q9UM73	ALK tyrosine kinase receptor	SwissTargetPrediction
AKT1	P31749	Serine/threonine-protein kinase AKT	SwissTargetPrediction
ABCB1	P08183	P-glycoprotein 1	SwissTargetPrediction
NEK6	Q9HC98	Serine/threonine-protein kinase NEK6	SwissTargetPrediction
PLA2G1B	P04054	Phospholipase A2 group 1B	SwissTargetPrediction
CA5A	P35218	Carbonic anhydrase VA	SwissTargetPrediction
BACE1	P56817	Beta-secretase 1	SwissTargetPrediction
AXL	P30530	Tyrosine-protein kinase receptor UFO	SwissTargetPrediction
ABCG2	Q9UNQ0	ATP-binding cassette sub-family G member 2	SwissTargetPrediction
NUAK1	O60285	NUAK family SNF1-like kinase 1	SwissTargetPrediction
AKR1C2	P52895	Aldo-keto reductase family 1 member C2 (by homology)	SwissTargetPrediction
AKR1C1	Q04828	Aldo-keto reductase family 1 member C1 (by homology)	SwissTargetPrediction
AKR1C3	P42330	Aldo-keto-reductase family 1 member C3 (by homology)	SwissTargetPrediction
AKR1C4	P17516	Aldo-keto reductase family 1 member C4 (by homology)	SwissTargetPrediction
CA13	Q8N1Q1	Carbonic anhydrase XIII (by homology)	SwissTargetPrediction
ADORA1	P30542	Adenosine A1 receptor (by homology)	SwissTargetPrediction
AKR1A1	P14550	Aldehyde reductase (by homology)	SwissTargetPrediction
GPR35	Q9HC97	G-protein coupled receptor 35	SwissTargetPrediction
SYK	P43405	Tyrosine-protein kinase SYK	SwissTargetPrediction
MAPT	P10636	Microtubule-associated protein tau	SwissTargetPrediction
KDM4E	B2RXH2	Lysine-specific demethylase 4D-like	SwissTargetPrediction
TOP2A	P11388	DNA topoisomerase II alpha	SwissTargetPrediction
MYLK	Q15746	Myosin light chain kinase, smooth muscle	SwissTargetPrediction
PIK3CG	P48736	PI3-kinase p110-gamma subunit	SwissTargetPrediction
APEX1	P27695	DNA-(apurinic or apyrimidinic site) lyase	SwissTargetPrediction
CDK5R1	Q15078	Cyclin-dependent kinase 5/CDK5 activator 1	SwissTargetPrediction
CCNB3	P06493	Cyclin-dependent kinase 1/cyclin B	SwissTargetPrediction
ARG1	P05089	Arginase-1 (by homology)	SwissTargetPrediction
PTPRS	Q13332	Receptor-type tyrosine-protein phosphatase S	SwissTargetPrediction
ESR2	Q92731	Estrogen receptor beta	SwissTargetPrediction
MPG	P29372	DNA-3-methyladenine glycosylase	SwissTargetPrediction
SLC22A12	Q96S37	Solute carrier family 22 member 12	SwissTargetPrediction
CDK6	Q00534	Cyclin-dependent kinase 6	SwissTargetPrediction
CDK2	P24941	Cyclin-dependent kinase 2	SwissTargetPrediction
TYR	P14679	Tyrosinase	SwissTargetPrediction
HSD17B1	P14061	Estradiol 17-beta-dehydrogenase 1	SwissTargetPrediction
AHR	P35869	Aryl hydrocarbon receptor	SwissTargetPrediction
ESRRA	P11474	Estrogen-related receptor alpha	SwissTargetPrediction
APP	P05067	Beta amyloid A4 protein	SwissTargetPrediction
PARP1	P09874	Poly [ADP-ribose] polymerase-1	SwissTargetPrediction
TTR	P02766	Transthyretin	SwissTargetPrediction
MMP12	P39900	Matrix metalloproteinase 12	SwissTargetPrediction
CD38	P28907	Lymphocyte differentiation antigen CD38	SwissTargetPrediction
AKR1B10	O60218	Aldo-keto reductase family 1 member B10	SwissTargetPrediction
TNKS2	Q9H2K2	Tankyrase-2	SwissTargetPrediction
TNKS	O95271	Tankyrase-1	SwissTargetPrediction
TOP1	P11387	DNA topoisomerase I (by homology)	SwissTargetPrediction
TERT	O14746	Telomerase reverse transcriptase	SwissTargetPrediction
ACACA	Q13085	Acetyl-CoA Carboxylase Alpha	SwissTargetPrediction
ACHE	P22303	acetylcholinesterase (Yt blood group)	SwissTargetPrediction
ACPP	P15309	acid phosphatase, prostate	SwissTargetPrediction
ADRB2	P07550	adrenergic, beta-2-, receptor, surface	SwissTargetPrediction
AKR1B1	P15121	Aldo-keto reductase family 1, member B1 (aldose reductase)	SymMap
AKT1	P31749	AKT Serine/threonine Kinase 1	SymMap
BCL2	P10415	BCL2, Apoptosis Regulator	SymMap
BCL2L1	Q07817	BCL2 like 1	SymMap
BIRC5	O15392	Baculoviral IAP repeat containing 5?	SymMap
CASP3	P42574	Caspase 3	SymMap
CASP8	Q14790	Caspase 8	SymMap
CAT	P04040	Catalase	SymMap
CCL2	P13500	C-C motif chemokine ligand 2	SymMap
CCND1	P24385	Cyclin D1	SymMap
CDKN1A	P38936	Cyclin Dependent Kinase Inhibitor 1A	SymMap
CHEK2	O96017	Checkpoint Kinase 2	SymMap
CHUK	O15111	Conserved Helix-loop-helix Ubiquitous Kinase	SymMap
COL1A1	P02452	Collagen Type I Alpha 1 Chain	SymMap
COL3A1	P02461	Collagen Type III Alpha 1 Chain	SymMap
CXCL10	P02778	C-X-C motif chemokine ligand 10	SymMap
CXCL8	P10145	C-X-C motif chemokine ligand 8	SymMap
CYP1A1	P04798	cytochrome P450 family 1 subfamily A member 1	SymMap
CYP1A2	P05177	cytochrome P450 family 1 subfamily A member 2	SymMap
CYP1B1	Q16678	Cytochrome P450 Family 1 Subfamily B Member 1	SymMap
CYP3A4	P08684	cytochrome P450 family 3 subfamily A member 4	SymMap
EGF	P01133	Epidermal Growth Factor	SymMap
EGFR	P00533	Epidermal Growth Factor Receptor	SymMap
ERBB2	P04626	Erb-b2 Receptor Tyrosine Kinase 2	SymMap
ESR1	P03372	Estrogen Receptor 1	SymMap
ESR2	Q92731	estrogen receptor 2	SymMap
F3	P13726	coagulation factor III, tissue factor	SymMap
FOS	P01100	Fos Proto-oncogene, AP-1 Transcription Factor Subunit	SymMap
GJA1	P17302	Gap Junction Protein Alpha 1	SymMap
GSK3B	P49841	glycogen synthase kinase 3 beta	SymMap
GSTP1	P09211	glutathione S-transferase pi 1	SymMap
HIF1A	Q16665	hypoxia inducible factor 1 subunit alpha	SymMap
HSF1	Q00613	heat shock transcription factor 1	SymMap
HSPA5	P11021	heat shock protein family A (Hsp70) member 5	SymMap
HSPB1	P04792	Heat Shock Protein Family B (small) Member 1	SymMap
IGFBP3	P17936	insulin like growth factor binding protein 3	SymMap
IL10	P22301	Interleukin 10	SymMap
IL1A	P01583	interleukin 1 alpha	SymMap
IL1B	P01584	interleukin 1 beta	SymMap
IL2	P60568	interleukin 2	SymMap
IL6	P05231	Interleukin 6	SymMap
JUN	P05412	Jun proto-oncogene, AP-1 transcription factor subunit	SymMap
MAOB	P27338	monoamine oxidase B	SymMap
MAPK3	P27361	Mitogen-activated Protein Kinase 3	SymMap
MGAM	O43451	maltase-glucoamylase	SymMap
MMP1	P03956	Matrix Metallopeptidase 1	SymMap
MMP2	P08253	Matrix Metallopeptidase 2	SymMap
MMP3	P08254	Matrix Metallopeptidase 3	SymMap
MMP9	P14780	Matrix Metallopeptidase 9	SymMap
MYC	P01106	MYC Proto-oncogene, BHLH Transcription Factor	SymMap
NCF1	P14598	Neutrophil Cytosolic Factor 1	SymMap
NFKBIA	P25963	NFKB Inhibitor Alpha	SymMap
NOS2	P35228	nitric oxide synthase 2	SymMap
NOS3	P29474	nitric oxide synthase 3	SymMap
NPEPPS	P55786	aminopeptidase puromycin sensitive	SymMap
NQO1	P15559	NAD(P)H quinone dehydrogenase 1	SymMap
ODC1	P11926	ornithine decarboxylase 1	SymMap
PARP1	P09874	poly(ADP-ribose) polymerase 1	SymMap
PLAT	P00750	Plasminogen Activator, Tissue Type	SymMap
PLAU	P00749	Plasminogen Activator, Urokinase	SymMap
PON1	P27169	Paraoxonase 1	SymMap
POR	P16435	Cytochrome P450 Oxidoreductase	SymMap
PPARA	Q07869	peroxisome proliferator activated receptor alpha	SymMap
PPARD	Q03181	peroxisome proliferator activated receptor delta	SymMap
PRKCA	P17252	protein kinase C alpha	SymMap
PRKCB	P05771	protein kinase C beta	SymMap
PRSS1	P07477	Serine Protease 1	SymMap
PTEN	P60484	Phosphatase And Tensin Homolog	SymMap
PTGER3	P43115	prostaglandin E receptor 3	SymMap
PTGS1	P23219	prostaglandin-endoperoxide synthase 1	SymMap
PTGS2	P35354	prostaglandin-endoperoxide synthase 2	SymMap
RAF1	P04049	Raf-1 Proto-oncogene, Serine/threonine Kinase	SymMap
RB1	P06400	RB Transcriptional Corepressor 1	SymMap
RELA	Q04206	RELA proto-oncogene, NF-kB subunit	SymMap
RXRA	P19793	retinoid X receptor alpha	SymMap
SCN5A	Q14524	Sodium Voltage-gated Channel Alpha Subunit 5	SymMap
SELE	P16581	selectin E	SymMap
SERPINE1	P05121	Serpin Family E Member 1	SymMap
SOD1	P00441	Superoxide Dismutase 1	SymMap
SULT1E1	P49888	sulfotransferase family 1E member 1	SymMap
TGFB1	P01137	Transforming Growth Factor Beta 1	SymMap
TOP1	P11387	DNA topoisomerase I	SymMap
TP53	P04637	Tumor Protein P53	SymMap
VCAM1	P19320	vascular cell adhesion molecule 1	SymMap
CCNB1	P14635	Cyclin B1	SymMap
ELK1	P19419	ELK1, ETS Transcription Factor	SymMap
BAX	Q07812	BCL2 Associated X, Apoptosis Regulator	SymMap
DIO1	P49895	Iodothyronine Deiodinase 1	SymMap
E2F1	Q01094	E2F Transcription Factor 1	SymMap
E2F2	Q14209	E2F Transcription Factor 2	SymMap
CLDN4	O14493	Claudin 4	SymMap
CASP9	P55211	Caspase 9	SymMap
RUNX1T1	Q06455	RUNX1 Translocation Partner 1	SymMap
HK2	P52789	Hexokinase 2	SymMap
CXCL2	P19875	C-X-C Motif Chemokine Ligand 2	SymMap
NFE2L2	Q16236	Nuclear Factor, Erythroid 2 Like 2	SymMap
NKX3-1	Q99801	NK3 Homeobox 1	SymMap
CXCL11	O14625	C-X-C Motif Chemokine Ligand 11	SymMap
PCOLCE	Q15113	Procollagen C-endopeptidase Enhancer	SymMap
PSMD3	O43242	Proteasome 26S Subunit, Non-ATPase 3	SymMap
SLC2A4	P14672	Solute Carrier Family 2 Member 4	SymMap
SOD3	P08294	Superoxide Dismutase 3	SymMap
SPP1	P10451	Secreted Phosphoprotein 1	SymMap
AHSA1	O95433	Activator Of HSP90 ATPase Activity 1	SymMap
DCAF5	Q96JK2	DDB1 And CUL4 Associated Factor 5	SymMap
HERC5	Q9UII4	HECT And RLD Domain Containing E3 Ubiquitin Protein Ligase 5	SymMap
GYRB	P0AES6	DNA Gyrase Subunit B	SymMap
CDC2	P06493	Cell Division Control Protein 2 Homolog/cyclin dependent kinase 1	SymMap
