# Supplementary material for: Investigating the Molecular Mechanism of Quercetin Protecting against Podocyte Injury to Attenuate Diabetic Nephropathy through Network Pharmacology, MicroarrayData Analysis, and Molecular Docking
Source: Evid Based Complement Alternat Med. 2022 May 16;2022:7291434. doi: 10.1155/2022/7291434 (PMC9126727; doi:10.1155/2022/7291434)
Supplement: Supplementary Materials — Supplementary Table 1: 355 targets of QUE. Supplementary Table 2: 4895 human genes related to DN. Supplementary Table 3: 848 human genes associated with podocyte injury. Supplementary Table 4: 42 mapping targets. Supplementary Table 5: specific analytical parameters of 41 candidate targets. Supplementary Table 6: 118 signaling pathways from R project. Supplementary Table 7: 52 biological functions from R project. [file 7291434.f1.zip › 7291434.f1/Supplementary Table 2-Genes of DN.txt]

Gene	Uniport ID/ GC ID	Description
ABCA1	O95477	ATP binding cassette subfamily A member 1
ABCC11	Q96J66	ATP binding cassette subfamily C member 11
ABCC6	O95255	ATP binding cassette subfamily C member 6
ABCC8	Q09428	ATP binding cassette subfamily C member 8
ACACB	O00763	acetyl-CoA carboxylase beta
ACCS	Q96QU6	1-aminocyclopropane-1-carboxylate synthase homolog (inactive)
ACE	P12821	angiotensin I converting enzyme
ACE2	Q9BYF1	angiotensin I converting enzyme 2
ACKR2	O00590	atypical chemokine receptor 2
ACOX1	Q15067	acyl-CoA oxidase 1
ACR	P10323	acrosin
ACSS2	Q9NR19	acyl-CoA synthetase short chain family member 2
ACTA2	P62736	actin alpha 2, smooth muscle
ACTB	P60709	actin beta
ACTG2	P63267	actin gamma 2, smooth muscle
ACTN4	O43707	actinin alpha 4
ACVR1	Q04771	activin A receptor type 1
ACVRL1	P37023	activin A receptor like type 1
ADAM10	O14672	ADAM metallopeptidase domain 10
ADAM17	P78536	ADAM metallopeptidase domain 17
ADAMTS13	Q76LX8	ADAM metallopeptidase with thrombospondin type 1 motif 13
ADCY8	P40145	adenylate cyclase 8
ADD1	P35611	adducin 1
ADD2	P35612	adducin 2
ADGRG1	Q9Y653	adhesion G protein-coupled receptor G1
ADH1B	P00325	alcohol dehydrogenase 1B (class I), beta polypeptide
ADIPOQ	Q15848	adiponectin, C1Q and collagen domain containing
ADIPOR1	Q96A54	adiponectin receptor 1
ADIPOR2	Q86V24	adiponectin receptor 2
ADM	P35318	adrenomedullin
ADORA1	P30542	adenosine A1 receptor
AFM	P43652	afamin
AGER	Q15109	advanced glycosylation end-product specific receptor
AGT	P01019	angiotensinogen
AGTR1	P30556	angiotensin II receptor type 1
AGTR2	P50052	angiotensin II receptor type 2
AHSA1	O95433	activator of HSP90 ATPase activity 1
AHSG	P02765	alpha 2-HS glycoprotein
AIFM1	O95831	apoptosis inducing factor mitochondria associated 1
AIMP2	Q13155	aminoacyl tRNA synthetase complex interacting multifunctional protein 2
AKAP1	Q92667	A-kinase anchoring protein 1
AKR1A1	P14550	aldo-keto reductase family 1 member A1
AKR1B1	P15121	aldo-keto reductase family 1 member B
AKT1	P31749	AKT serine/threonine kinase 1
ALB	P02768	albumin
ALCAM	Q13740	activated leukocyte cell adhesion molecule
ALDH2	P05091	aldehyde dehydrogenase 2 family member
ALKBH1	Q13686	alkB homolog 1, histone H2A dioxygenase
ALOX12	P18054	arachidonate 12-lipoxygenase, 12S type
ALPK1	Q96QP1	alpha kinase 1
AMT	P48728	aminomethyltransferase
ANG	P03950	angiogenin
ANGPT1	Q15389	angiopoietin 1
ANGPT2	O15123	angiopoietin 2
ANGPTL2	Q9UKU9	angiopoietin like 2
ANGPTL4	Q9BY76	angiopoietin like 4
ANKRD1	Q15327	ankyrin repeat domain 1
ANO1	Q5XXA6	anoctamin 1
AOC3	Q16853	amine oxidase copper containing 3
APEX1	P27695	apurinic/apyrimidinic endodeoxyribonuclease 1
APLN	Q9ULZ1	apelin
APLNR	P35414	apelin receptor
APOA1	P02647	apolipoprotein A1
APOA4	P06727	apolipoprotein A4
APOA5	Q6Q788	apolipoprotein A5
APOB	P04114	apolipoprotein B
APOC1	P02654	apolipoprotein C1
APOC3	P02656	apolipoprotein C3
APOE	P02649	apolipoprotein E
APOH	P02749	apolipoprotein H
APOL1	O14791	apolipoprotein L1
APOL3	O95236	apolipoprotein L3
APOM	O95445	apolipoprotein M
APRT	P07741	adenine phosphoribosyltransferase
AQP1	P29972	aquaporin 1 (Colton blood group)
AQP11	Q8NBQ7	aquaporin 11
AQP2	P41181	aquaporin 2
AQP5	P55064	aquaporin 5
ARAP1	Q96P48	ArfGAP with RhoGAP domain, ankyrin repeat and PH domain 1
ARF6	P62330	ADP ribosylation factor 6
ARG1	P05089	arginase 1
ARG2	P78540	arginase 2
ARID2	Q68CP9	AT-rich interaction domain 2
ARRB1	P49407	arrestin beta 1
ARRB2	P32121	arrestin beta 2
ATF6	P18850	activating transcription factor 6
ATM	Q13315	ATM serine/threonine kinase
ATN1	P54259	atrophin 1
ATP2A2	P16615	ATPase sarcoplasmic/endoplasmic reticulum Ca2+ transporting 2
ATP5F1B	P06576	ATP synthase F1 subunit beta
ATP6AP2	O75787	ATPase H+ transporting accessory protein 2
AVP	P01185	arginine vasopressin
AVPR2	P30518	arginine vasopressin receptor 2
AXIN2	Q9Y2T1	axin 2
AXL	P30530	AXL receptor tyrosine kinase
AZIN1	O14977	antizyme inhibitor 1
AZU1	P20160	azurocidin 1
B2M	P61769	beta-2-microglobulin
B3GALNT1	O75752	beta-1,3-N-acetylgalactosaminyltransferase 1 (globoside blood group)
BASP1	P80723	brain abundant membrane attached signal protein 1
BBOX1	O75936	gamma-butyrobetaine hydroxylase 1
BCL2	P10415	BCL2 apoptosis regulator
BCR	P11274	BCR activator of RhoGEF and GTPase
BDKRB2	P30411	bradykinin receptor B2
BDNF	P23560	brain derived neurotrophic factor
BECN1	Q14457	beclin 1
BEST1	O76090	bestrophin 1
BGLAP	P02818	bone gamma-carboxyglutamate protein
BGN	P21810	biglycan
BMP2	P12643	bone morphogenetic protein 2
BMP4	P12644	bone morphogenetic protein 4
BMP7	P18075	bone morphogenetic protein 7
BNIP3	Q12983	BCL2 interacting protein 3
BRD2	P25440	bromodomain containing 2
BRD4	O60885	bromodomain containing 4
BSG	P35613	basigin (Ok blood group)
BTRC	Q9Y297	beta-transducin repeat containing E3 ubiquitin protein ligase
C3	P01024	complement C3
C3AR1	Q16581	complement C3a receptor 1
C5	P01031	complement C5
C5AR1	P21730	complement C5a receptor 1
CADM1	Q9BY67	cell adhesion molecule 1
CALB1	P05937	calbindin 1
CALCRL	Q16602	calcitonin receptor like receptor
CALD1	Q05682	caldesmon 1
CAMKK2	Q96RR4	calcium/calmodulin dependent protein kinase kinase 2
CAPN10	Q9HC96	calpain 10
CARS1	P49589	cysteinyl-tRNA synthetase 1
CASC2	Q6XLA1	cancer susceptibility 2
CASP12	Q6UXS9	caspase 12 (gene/pseudogene)
CASP3	P42574	caspase 3
CASP7	P55210	caspase 7
CASP8	Q14790	caspase 8
CASP9	P55211	caspase 9
CAT	P04040	catalase
CAV1	Q03135	caveolin 1
CCHCR1	Q8TD31	coiled-coil alpha-helical rod protein 1
CCL1	P22362	C-C motif chemokine ligand 1
CCL2	P13500	C-C motif chemokine ligand 2
CCL20	P78556	C-C motif chemokine ligand 20
CCL5	P13501	C-C motif chemokine ligand 5
CCN2	P29279	cellular communication network factor 2
CCNE1	P24864	cyclin E1
CCNG2	Q16589	cyclin G2
CCR1	P32246	C-C motif chemokine receptor 1
CCR2	P41597	C-C motif chemokine receptor 2
CCR5	P51681	C-C motif chemokine receptor 5 (gene/pseudogene)
CCR6	P51684	C-C motif chemokine receptor 6
CCT2	P78371	chaperonin containing TCP1 subunit 2
CD163	Q86VB7	CD163 molecule
CD2AP	Q9Y5K6	CD2 associated protein
CD36	P16671	CD36 molecule
CD38	P28907	CD38 molecule
CD40LG	P29965	CD40 ligand
CD44	P16070	CD44 molecule (Indian blood group)
CD59	P13987	CD59 molecule (CD59 blood group)
CD5L	O43866	CD5 molecule like
CD68	P34810	CD68 molecule
CD74	P04233	CD74 molecule
CD80	P33681	CD80 molecule
CDAN1	Q8IWY9	codanin 1
CDC42	P60953	cell division cycle 42
CDH13	P55290	cadherin 13
CDH2	P19022	cadherin 2
CDK5	Q00535	cyclin dependent kinase 5
CDKAL1	Q5VV42	CDK5 regulatory subunit associated protein 1 like 1
CDKN1A	P38936	cyclin dependent kinase inhibitor 1A
CDKN1B	P46527	cyclin dependent kinase inhibitor 1B
CDKN2A	P42771;Q8N726	cyclin dependent kinase inhibitor 2A
CEBPB	P17676	CCAAT enhancer binding protein beta
CETP	P11597	cholesteryl ester transfer protein
CFD	P00746	complement factor D
CFL1	P23528	cofilin 1
CHI3L1	P36222	chitinase 3 like 1
CHIT1	Q13231	chitinase 1
CHN2	P52757	chimerin 2
CHPT1	Q8WUD6	choline phosphotransferase 1
CLU	P10909	clusterin
CMKLR1	Q99788	chemerin chemokine-like receptor 1
CNBP	P62633	CCHC-type zinc finger nucleic acid binding protein
CNDP1	Q96KN2	carnosine dipeptidase 1
CNDP2	Q96KP4	carnosine dipeptidase 2
CNKSR3	Q6P9H4	CNKSR family member 3
CNR1	P21554	cannabinoid receptor 1
COL11A2	P13942	collagen type XI alpha 2 chain
COL18A1	P39060	collagen type XVIII alpha 1 chain
COL1A1	P02452	collagen type I alpha 1 chain
COL1A2	P08123	collagen type I alpha 2 chain
COL4A1	P02462	collagen type IV alpha 1 chain
COL4A5	P29400	collagen type IV alpha 5 chain
COL6A3	P12111	collagen type VI alpha 3 chain
COL8A1	P27658	collagen type VIII alpha 1 chain
COL8A2	P25067	collagen type VIII alpha 2 chain
COPB2	P35606	COPI coat complex subunit beta 2
CORO2B	Q9UQ03	coronin 2B
COX1	P00395	cytochrome c oxidase subunit I
COX2	P00403	cytochrome c oxidase subunit II
COX8A	P10176	cytochrome c oxidase subunit 8A
CP	P00450	ceruloplasmin
CPB2	Q96IY4	carboxypeptidase B2
CPT1A	P50416	carnitine palmitoyltransferase 1A
CPT1B	Q92523	carnitine palmitoyltransferase 1B
CPT2	P23786	carnitine palmitoyltransferase 2
CR1	P17927	complement C3b/C4b receptor 1 (Knops blood group)
CREB1	P16220	cAMP responsive element binding protein 1
CREM	Q03060	cAMP responsive element modulator
CRISP2	P16562	cysteine rich secretory protein 2
CRK	P46108	CRK proto-oncogene, adaptor protein
CRMP1	Q14194	collapsin response mediator protein 1
CRP	P02741	C-reactive protein
CRTC1	Q6UUV9	CREB regulated transcription coactivator 1
CRYZ	Q08257	crystallin zeta
CSF1R	P07333	colony stimulating factor 1 receptor
CSNK2A2	P19784	casein kinase 2 alpha 2
CST2	P09228	cystatin SA
CST3	P01034	cystatin C
CTNNB1	P35222	catenin beta 1
CTSB	P07858	cathepsin B
CTSD	P07339	cathepsin D
CUBN	O60494	cubilin
CUL5	Q93034	cullin 5
CXCL10	P02778	C-X-C motif chemokine ligand 10
CXCL12	P48061	C-X-C motif chemokine ligand 12
CXCL16	Q9H2A7	C-X-C motif chemokine ligand 16
CXCL6	P80162	C-X-C motif chemokine ligand 6
CXCL8	P10145	C-X-C motif chemokine ligand 8
CXCL9	Q07325	C-X-C motif chemokine ligand 9
CXCR1	P25024	C-X-C motif chemokine receptor 1
CXCR2	P25025	C-X-C motif chemokine receptor 2
CXCR4	P61073	C-X-C motif chemokine receptor 4
CYBA	P13498	cytochrome b-245 alpha chain
CYBB	P04839	cytochrome b-245 beta chain
CYLD	Q9NQC7	CYLD lysine 63 deubiquitinase
CYP11B2	P19099	cytochrome P450 family 11 subfamily B member 2
CYP19A1	P11511	cytochrome P450 family 19 subfamily A member 1
CYP24A1	Q07973	cytochrome P450 family 24 subfamily A member 1
CYP27B1	O15528	cytochrome P450 family 27 subfamily B member 1
CYP2R1	Q6VVX0	cytochrome P450 family 2 subfamily R member 1
CYP4B1	P13584	cytochrome P450 family 4 subfamily B member 1
DAAM1	Q9Y4D1	dishevelled associated activator of morphogenesis 1
DAPK2	Q9UIK4	death associated protein kinase 2
DBP	Q10586	D-box binding PAR bZIP transcription factor
DCN	P07585	decorin
DCTN4	Q9UJW0	dynactin subunit 4
DDAH1	O94760	dimethylarginine dimethylaminohydrolase 1
DDAH2	O95865	dimethylarginine dimethylaminohydrolase 2
DDIT3	P35638	DNA damage inducible transcript 3
DDOST	P39656	dolichyl-diphosphooligosaccharide--protein glycosyltransferase non-catalytic subunit
DDT	P30046	D-dopachrome tautomerase
DECR1	Q16698	2,4-dienoyl-CoA reductase 1
DEFA1	P59665	defensin alpha 1
DEFA3	P59666	defensin alpha 3
DENR	O43583	density regulated re-initiation and release factor
DERL2	Q9GZP9	derlin 2
DES	P17661	desmin
DGKA	P23743	diacylglycerol kinase alpha
DGKH	Q86XP1	diacylglycerol kinase eta
DKK1	O94907	dickkopf WNT signaling pathway inhibitor 1
DMP1	Q13316	dentin matrix acidic phosphoprotein 1
DMTF1	Q9Y222	cyclin D binding myb like transcription factor 1
DNM1L	O00429	dynamin 1 like
DNMT1	P26358	DNA methyltransferase 1
DNMT3A	Q9Y6K1	DNA methyltransferase 3 alpha
DNMT3B	Q9UBC3	DNA methyltransferase 3 beta
DPP4	P27487	dipeptidyl peptidase 4
DPYD	Q12882	dihydropyrimidine dehydrogenase
DPYS	Q14117	dihydropyrimidinase
DRD3	P35462	dopamine receptor D3
DRG1	Q9Y295	developmentally regulated GTP binding protein 1
DSEL	Q8IZU8	dermatan sulfate epimerase like
DSPP	Q9NZW4	dentin sialophosphoprotein
DUOX1	Q9NRD9	dual oxidase 1
DUOX2	Q9NRD8	dual oxidase 2
DUSP1	P28562	dual specificity phosphatase 1
DUSP26	Q9BV47	dual specificity phosphatase 26
DUSP4	Q13115	dual specificity phosphatase 4
E2F1	Q01094	E2F transcription factor 1
E2F3	O00716	E2F transcription factor 3
EBI3	Q14213	Epstein-Barr virus induced 3
EDA	Q92838	ectodysplasin A
EDN1	P05305	endothelin 1
EDNRA	P25101	endothelin receptor type A
EFHD2	Q96C19	EF-hand domain family member D2
EFNA1	P20827	ephrin A1
EGF	P01133	epidermal growth factor
EGFR	P00533	epidermal growth factor receptor
EGR1	P18146	early growth response 1
EHMT1	Q9H9B1	euchromatic histone lysine methyltransferase 1
EIF2AK3	Q9NZJ5	eukaryotic translation initiation factor 2 alpha kinase 3
EIF3M	Q7L2H7	eukaryotic translation initiation factor 3 subunit M
ELAVL1	Q15717	ELAV like RNA binding protein 1
ELAVL2	Q12926	ELAV like RNA binding protein 2
ELF3	P78545	E74 like ETS transcription factor 3
ELMO1	Q92556	engulfment and cell motility 1
ENG	P17813	endoglin
ENO2	P09104	enolase 2
ENOX1	Q8TC92	ecto-NOX disulfide-thiol exchanger 1
ENPEP	Q07075	glutamyl aminopeptidase
ENPP1	P22413	ectonucleotide pyrophosphatase/phosphodiesterase 1
ENTPD1	P49961	ectonucleoside triphosphate diphosphohydrolase 1
EP300	Q09472	E1A binding protein p300
EPAS1	Q99814	endothelial PAS domain protein 1
EPHA1	P21709	EPH receptor A1
EPHB2	P29323	EPH receptor B2
EPHX2	P34913	epoxide hydrolase 2
EPO	P01588	erythropoietin
ERBB4	Q15303	erb-b2 receptor tyrosine kinase 4
EREG	O14944	epiregulin
ERP44	Q9BS26	endoplasmic reticulum protein 44
ERRFI1	Q9UJM3	ERBB receptor feedback inhibitor 1
ESAM	Q96AP7	endothelial cell adhesion molecule
ESCO1	Q5FWF5	establishment of sister chromatid cohesion N-acetyltransferase 1
ESM1	Q9NQ30	endothelial cell specific molecule 1
ESR1	P03372	estrogen receptor 1
ETF1	P62495	eukaryotic translation termination factor 1
ETS1	P14921	ETS proto-oncogene 1, transcription factor
EZH2	Q15910	enhancer of zeste 2 polycomb repressive complex 2 subunit
EZR	P15311	ezrin
F10	P00742	coagulation factor X
F2R	P25116	coagulation factor II thrombin receptor
F2RL1	P55085	F2R like trypsin receptor 1
F5	P12259	coagulation factor V
FABP1	P07148	fatty acid binding protein 1
FABP2	P12104	fatty acid binding protein 2
FABP4	P15090	fatty acid binding protein 4
FAR2	Q96K12	fatty acyl-CoA reductase 2
FAS	P25445	Fas cell surface death receptor
FASN	P49327	fatty acid synthase
FBXW7	Q969H0	F-box and WD repeat domain containing 7
FFAR2	O15552	free fatty acid receptor 2
FGF1	P05230	fibroblast growth factor 1
FGF11	Q92914	fibroblast growth factor 11
FGF13	Q92913	fibroblast growth factor 13
FGF2	P09038	fibroblast growth factor 2
FGF21	Q9NSA1	fibroblast growth factor 21
FGF23	Q9GZV9	fibroblast growth factor 23
FHL2	Q14192	four and a half LIM domains 2
FIS1	Q9Y3D6	fission, mitochondrial 1
FITM1	A5D6W6	fat storage inducing transmembrane protein 1
FLT1	P17948	fms related receptor tyrosine kinase 1
FLT4	P35916	fms related receptor tyrosine kinase 4
FN1	P02751	fibronectin 1
FN3K	Q9H479	fructosamine 3 kinase
FNDC5	Q8NAU1	fibronectin type III domain containing 5
FOXA1	P55317	forkhead box A1
FOXC1	Q12948	forkhead box C1
FOXO1	Q12778	forkhead box O1
FOXP1	Q9H334	forkhead box P1
FOXP3	Q9BZS1	forkhead box P3
FPR2	P25090	formyl peptide receptor 2
FRMD3	A2A2Y4	FERM domain containing 3
FSCN1	Q16658	fascin actin-bundling protein 1
FSD1	Q9BTV5	fibronectin type III and SPRY domain containing 1
FSD1L	Q9BXM9	fibronectin type III and SPRY domain containing 1 like
FST	P19883	follistatin
FTO	Q9C0B1	FTO alpha-ketoglutarate dependent dioxygenase
FUT8	Q9BYC5	fucosyltransferase 8
G6PD	P11413	glucose-6-phosphate dehydrogenase
GABPA	Q06546	GA binding protein transcription factor subunit alpha
GAS6	Q14393	growth arrest specific 6
GAST	P01350	gastrin
GC	P02774	GC vitamin D binding protein
GCG	P01275	glucagon
GCK	P35557	glucokinase
GDE1	Q9NZC3	glycerophosphodiester phosphodiesterase 1
GDF15	Q99988	growth differentiation factor 15
GFPT1	Q06210	glutamine--fructose-6-phosphate transaminase 1
GFPT2	O94808	glutamine-fructose-6-phosphate transaminase 2
GH1	P01241	growth hormone 1
GHR	P10912	growth hormone receptor
GHRL	Q9UBU3	ghrelin and obestatin prepropeptide
GIPR	P48546	gastric inhibitory polypeptide receptor
GJA1	P17302	gap junction protein alpha 1
GJB1	P08034	gap junction protein beta 1
GLIPR2	Q9H4G4	GLI pathogenesis related 2
GLO1	Q04760	glyoxalase I
GLP1R	P43220	glucagon like peptide 1 receptor
GOLGA6A	Q9NYA3	golgin A6 family member A
GORASP1	Q9BQQ3	golgi reassembly stacking protein 1
GPBAR1	Q8TDU6	G protein-coupled bile acid receptor 1
GPC5	P78333	glypican 5
GPR158	Q5T848	G protein-coupled receptor 158
GPRC5A	Q8NFJ5	G protein-coupled receptor class C group 5 member A
GPRC5B	Q9NZH0	G protein-coupled receptor class C group 5 member B
GPX1	P07203	glutathione peroxidase 1
GPX3	P22352	glutathione peroxidase 3
GPX4	P36969	glutathione peroxidase 4
GRAP	Q13588	GRB2 related adaptor protein
GRAP2	O75791	GRB2 related adaptor protein 2
GRB2	P62993	growth factor receptor bound protein 2
GREM1	O60565	gremlin 1, DAN family BMP antagonist
GREM2	Q9H772	gremlin 2, DAN family BMP antagonist
GRK2	P25098	G protein-coupled receptor kinase 2
GRK3	P35626	G protein-coupled receptor kinase 3
GRK4	P32298	G protein-coupled receptor kinase 4
GRK6	P43250	G protein-coupled receptor kinase 6
GRN	P28799	granulin precursor
GSDMD	P57764	gasdermin D
GSK3B	P49841	glycogen synthase kinase 3 beta
GSR	P00390	glutathione-disulfide reductase
GSTK1	Q9Y2Q3	glutathione S-transferase kappa 1
GSTM1	P09488	glutathione S-transferase mu 1
GSTM2	P28161	glutathione S-transferase mu 2
GSTP1	P09211	glutathione S-transferase pi 1
GSTT1	P30711	glutathione S-transferase theta 1
GTF2H1	P32780	general transcription factor IIH subunit 1
GUCY1A1	Q02108	guanylate cyclase 1 soluble subunit alpha 1
H2BS1	P57053	H2B.S histone 1
HAS2	Q92819	hyaluronan synthase 2
HAVCR1	Q96D42	hepatitis A virus cellular receptor 1
HAVCR2	Q8TDQ0	hepatitis A virus cellular receptor 2
HCN1	O60741	hyperpolarization activated cyclic nucleotide gated potassium channel 1
HDAC2	Q92769	histone deacetylase 2
HDAC4	P56524	histone deacetylase 4
HDAC5	Q9UQL6	histone deacetylase 5
HDLBP	Q00341	high density lipoprotein binding protein
HEBP1	Q9NRV9	heme binding protein 1
HES1	Q14469	hes family bHLH transcription factor 1
HFE	Q30201	homeostatic iron regulator
HGF	P14210	hepatocyte growth factor
HHIP	Q96QV1	hedgehog interacting protein
HIF1A	Q16665	hypoxia inducible factor 1 subunit alpha
HLA-B	P01889	major histocompatibility complex, class I, B
HLA-DPA1	P20036	major histocompatibility complex, class II, DP alpha 1
HLA-DQA1	P01909	major histocompatibility complex, class II, DQ alpha 1
HLA-DRB1	P01911	major histocompatibility complex, class II, DR beta 1
HMCN1	Q96RW7	hemicentin 1
HMGA2	P52926	high mobility group AT-hook 2
HMGB1	P09429	high mobility group box 1
HMGN1	P05114	high mobility group nucleosome binding domain 1
HMOX1	P09601	heme oxygenase 1
HNF1A	P20823	HNF1 homeobox A
HNF1B	P35680	HNF1 homeobox B
HNF4A	P41235	hepatocyte nuclear factor 4 alpha
HNMT	P50135	histamine N-methyltransferase
HP	P00738	haptoglobin
HPGDS	O60760	hematopoietic prostaglandin D synthase
HPSE	Q9Y251	heparanase
HSD11B2	P80365	hydroxysteroid 11-beta dehydrogenase 2
HSPA1A	P0DMV8;P0DMV9	heat shock protein family A (Hsp70) member 1A
HSPA1B	P0DMV8;P0DMV9	heat shock protein family A (Hsp70) member 1B
HSPA4	P34932	heat shock protein family A (Hsp70) member 4
HSPA5	P11021	heat shock protein family A (Hsp70) member 5
HSPB1	P04792	heat shock protein family B (small) member 1
HSPB2	Q16082	heat shock protein family B (small) member 2
HSPB3	Q12988	heat shock protein family B (small) member 3
HSPG2	P98160	heparan sulfate proteoglycan 2
HTR2A	P28223	5-hydroxytryptamine receptor 2A
HYOU1	Q9Y4L1	hypoxia up-regulated 1
IAPP	P10997	islet amyloid polypeptide
ICAM1	P05362	intercellular adhesion molecule 1
ID2	Q02363	inhibitor of DNA binding 2
IDUA	P35475	alpha-L-iduronidase
IFNA1	P01562	interferon alpha 1
IFNA13	P01562	interferon alpha 13
IFNG	P01579	interferon gamma
IGF1	P05019	insulin like growth factor 1
IGF1R	P08069	insulin like growth factor 1 receptor
IGF2	P01344	insulin like growth factor 2
IGF2BP2	Q9Y6M1	insulin like growth factor 2 mRNA binding protein 2
IGFBP1	P08833	insulin like growth factor binding protein 1
IGFBP3	P17936	insulin like growth factor binding protein 3
IGFBP4	P22692	insulin like growth factor binding protein 4
IGFBP7	Q16270	insulin like growth factor binding protein 7
IKBKB	O14920	inhibitor of nuclear factor kappa B kinase subunit beta
IL10	P22301	interleukin 10
IL12RB1	P42701	interleukin 12 receptor subunit beta 1
IL13	P35225	interleukin 13
IL15	P40933	interleukin 15
IL17A	Q16552	interleukin 17A
IL17B	Q9UHF5	interleukin 17B
IL18	Q14116	interleukin 18
IL18R1	Q13478	interleukin 18 receptor 1
IL19	Q9UHD0	interleukin 19
IL1A	P01583	interleukin 1 alpha
IL1B	P01584	interleukin 1 beta
IL1R1	P14778	interleukin 1 receptor type 1
IL1RL1	Q01638	interleukin 1 receptor like 1
IL1RN	P18510	interleukin 1 receptor antagonist
IL2	P60568	interleukin 2
IL20	Q9NYY1	interleukin 20
IL22	Q9GZX6	interleukin 22
IL33	O95760	interleukin 33
IL34	Q6ZMJ4	interleukin 34
IL4	P05112	interleukin 4
IL5	P05113	interleukin 5
IL6	P05231	interleukin 6
IL6R	P08887	interleukin 6 receptor
IL6ST	P40189	interleukin 6 signal transducer
INHBC	P55103	inhibin subunit beta C
INPPL1	O15357	inositol polyphosphate phosphatase like 1
INS	P01308	insulin
INSR	P06213	insulin receptor
INTU	Q9ULD6	inturned planar cell polarity protein
IPCEF1	Q8WWN9	interaction protein for cytohesin exchange factors 1
IPPK	Q9H8X2	inositol-pentakisphosphate 2-kinase
IQGAP1	P46940	IQ motif containing GTPase activating protein 1
IRAK1	P51617	interleukin 1 receptor associated kinase 1
IRAK4	Q9NWZ3	interleukin 1 receptor associated kinase 4
IRS1	P35568	insulin receptor substrate 1
IRS2	Q9Y4H2	insulin receptor substrate 2
ISYNA1	Q9NPH2	inositol-3-phosphate synthase 1
ITGA1	P56199	integrin subunit alpha 1
ITGA2B	P08514	integrin subunit alpha 2b
ITGAM	P11215	integrin subunit alpha M
ITGB3	P05106	integrin subunit beta 3
ITPR1	Q14643	inositol 1,4,5-trisphosphate receptor type 1
JAG1	P78504	jagged canonical Notch ligand 1
JAK1	P23458	Janus kinase 1
JAK2	O60674	Janus kinase 2
JUN	P05412	Jun proto-oncogene, AP-1 transcription factor subunit
KCNH7	Q9NS40	potassium voltage-gated channel subfamily H member 7
KCNJ11	Q14654	potassium inwardly rectifying channel subfamily J member 11
KCNQ1	P51787	potassium voltage-gated channel subfamily Q member 1
KDM6A	O15550	lysine demethylase 6A
KDR	P35968	kinase insert domain receptor
KEAP1	Q14145	kelch like ECH associated protein 1
KHDRBS1	Q07666	KH RNA binding domain containing, signal transduction associated 1
KHK	P50053	ketohexokinase
KIRREL1	Q96J84	kirre like nephrin family adhesion molecule 1
KL	Q9UEF7	klotho
KLF15	Q9UIH9	Kruppel like factor 15
KLF2	Q9Y5W3	Kruppel like factor 2
KLF4	O43474	Kruppel like factor 4
KLF6	Q99612	Kruppel like factor 6
KLK1	P06870	kallikrein 1
KMT2A	Q03164	lysine methyltransferase 2A
KNG1	P01042	kininogen 1
KPNA2	P52292	karyopherin subunit alpha 2
KRT16	P08779	keratin 16
LAD1	O00515	ladinin 1
LAMB2	P55268	laminin subunit beta 2
LAMP2	P13473	lysosomal associated membrane protein 2
LARGE1	O95461	LARGE xylosyl- and glucuronyltransferase 1
LCK	P06239	LCK proto-oncogene, Src family tyrosine kinase
LCN1	P31025	lipocalin 1
LCN2	P80188	lipocalin 2
LEP	P41159	leptin
LEPR	P48357	leptin receptor
LGALS1	P09382	galectin 1
LGALS3	P17931	galectin 3
LIMK2	P53671	LIM domain kinase 2
LIN28A	Q9H9Z2	lin-28 homolog A
LINC00472	Q9H8W2	long intergenic non-protein coding RNA 472
LINC01619	G3V211	long intergenic non-protein coding RNA 1619
LIPC	P11150	lipase C, hepatic type
LMNA	P02545	lamin A/C
LOC102724334	P57053	histone H2B type F-S-like
LOXL2	Q9Y4K0	lysyl oxidase like 2
LPA	P08519	lipoprotein(a)
LPAR1	Q92633	lysophosphatidic acid receptor 1
LPAR3	Q9UBY5	lysophosphatidic acid receptor 3
LPL	P06858	lipoprotein lipase
LRG1	P02750	leucine rich alpha-2-glycoprotein 1
LRP2	P98164	LDL receptor related protein 2
LRP5	O75197	LDL receptor related protein 5
LRP6	O75581	LDL receptor related protein 6
LRPAP1	P30533	LDL receptor related protein associated protein 1
LRRC7	Q96NW7	leucine rich repeat containing 7
LTA	P01374	lymphotoxin alpha
LTBP1	Q14766	latent transforming growth factor beta binding protein 1
LYZ	P61626	lysozyme
MAK16	Q9BXY0	MAK16 homolog
MALT1	Q9UDY8	MALT1 paracaspase
MAP1LC3A	Q9H492	microtubule associated protein 1 light chain 3 alpha
MAP2K2	P36507	mitogen-activated protein kinase kinase 2
MAP2K7	O14733	mitogen-activated protein kinase kinase 7
MAP3K1	Q13233	mitogen-activated protein kinase kinase kinase 1
MAP3K5	Q99683	mitogen-activated protein kinase kinase kinase 5
MAP3K7	O43318	mitogen-activated protein kinase kinase kinase 7
MAP6	Q96JE9	microtubule associated protein 6
MAPK1	P28482	mitogen-activated protein kinase 1
MAPK14	Q16539	mitogen-activated protein kinase 14
MAPK3	P27361	mitogen-activated protein kinase 3
MAPK8	P45983	mitogen-activated protein kinase 8
MARCKSL1	P49006	MARCKS like 1
MARK2	Q7KZI7	microtubule affinity regulating kinase 2
MASP2	O00187	mannan binding lectin serine peptidase 2
MB	P02144	myoglobin
MBL2	P11226	mannose binding lectin 2
MBNL2	Q5VZF2	muscleblind like splicing regulator 2
MCAM	P43121	melanoma cell adhesion molecule
MCF2L2	Q86YR7	MCF.2 cell line derived transforming sequence-like 2
MCM3	P25205	minichromosome maintenance complex component 3
MDK	P21741	midkine
MDM2	Q00987	MDM2 proto-oncogene
MEFV	O15553	MEFV innate immuity regulator, pyrin
MEP1B	Q16820	meprin A subunit beta
MFAP1	P55081	microfibril associated protein 1
MFHAS1	Q9Y4C4	malignant fibrous histiocytoma amplified sequence 1
MFN2	O95140	mitofusin 2
MGAM	O43451	maltase-glucoamylase
MGP	P08493	matrix Gla protein
MICOS10-NBL1	P41271	MICOS10-NBL1 readthrough
MIF	P14174	macrophage migration inhibitory factor
MINDY4	Q4G0A6	MINDY lysine 48 deubiquitinase 4
MIOX	Q9UGB7	myo-inositol oxygenase
MIXL1	Q9H2W2	Mix paired-like homeobox
MLLT3	P42568	MLLT3 super elongation complex subunit
MLN	P12872	motilin
MLXIPL	Q9NP71	MLX interacting protein like
MME	P08473	membrane metalloendopeptidase
MMP1	P03956	matrix metallopeptidase 1
MMP10	P09238	matrix metallopeptidase 10
MMP12	P39900	matrix metallopeptidase 12
MMP2	P08253	matrix metallopeptidase 2
MMP3	P08254	matrix metallopeptidase 3
MMP7	P09237	matrix metallopeptidase 7
MMP8	P22894	matrix metallopeptidase 8
MMP9	P14780	matrix metallopeptidase 9
MMRN1	Q13201	multimerin 1
MOK	Q9UQ07	MOK protein kinase
MPO	P05164	myeloperoxidase
MPRIP	Q6WCQ1	myosin phosphatase Rho interacting protein
MRAS	O14807	muscle RAS oncogene homolog
MRTFA	Q969V6	myocardin related transcription factor A
MSC	O60682	musculin
MSN	P26038	moesin
MSX2	P35548	msh homeobox 2
MTDH	Q86UE4	metadherin
MTHFR	P42898	methylenetetrahydrofolate reductase
MTHFS	P49914	methenyltetrahydrofolate synthetase
MTOR	P42345	mechanistic target of rapamycin kinase
MYCN	P04198	MYCN proto-oncogene, bHLH transcription factor
MYD88	Q99836	MYD88 innate immune signal transduction adaptor
MYH2	Q9UKX2	myosin heavy chain 2
MYH9	P35579	myosin heavy chain 9
MYOCD	Q8IZQ8	myocardin
MZF1	P28698	myeloid zinc finger 1
NAT2	P11245	N-acetyltransferase 2
NAV3	Q8IVL0	neuron navigator 3
NBL1	P41271	NBL1, DAN family BMP antagonist
NCALD	P61601	neurocalcin delta
NCF1	P14598	neutrophil cytosolic factor 1
NCK1	P16333	NCK adaptor protein 1
NCL	P19338	nucleolin
NDN	Q99608	necdin, MAGE family member
NDUFS3	O75489	NADH:ubiquinone oxidoreductase core subunit S3
NFAT5	O94916	nuclear factor of activated T cells 5
NFE2L2	Q16236	nuclear factor, erythroid 2 like 2
NFIA	Q12857	nuclear factor I A
NFIB	O00712	nuclear factor I B
NFIC	P08651	nuclear factor I C
NFIX	Q14938	nuclear factor I X
NFKB1	P19838	nuclear factor kappa B subunit 1
NFKBIA	P25963	NFKB inhibitor alpha
NLRC4	Q9NPP4	NLR family CARD domain containing 4
NLRC5	Q86WI3	NLR family CARD domain containing 5
NLRP1	Q9C000	NLR family pyrin domain containing 1
NLRP3	Q96P20	NLR family pyrin domain containing 3
NLRX1	Q86UT6	NLR family member X1
NMUR2	Q9GZQ4	neuromedin U receptor 2
NOD2	Q9HC29	nucleotide binding oligomerization domain containing 2
NOS1	P29475	nitric oxide synthase 1
NOS2	P35228	nitric oxide synthase 2
NOS3	P29474	nitric oxide synthase 3
NOTCH1	P46531	notch receptor 1
NOTCH2	Q04721	notch receptor 2
NOTCH3	Q9UM47	notch receptor 3
NOX1	Q9Y5S8	NADPH oxidase 1
NOX3	Q9HBY0	NADPH oxidase 3
NOX4	Q9NPH5	NADPH oxidase 4
NOX5	Q96PH1	NADPH oxidase 5
NPHS1	O60500	NPHS1 adhesion molecule, nephrin
NPHS2	Q9NP85	NPHS2 stomatin family member, podocin
NPPA	P01160	natriuretic peptide A
NPPB	P16860	natriuretic peptide B
NPY	P01303	neuropeptide Y
NQO1	P15559	NAD(P)H quinone dehydrogenase 1
NR0B2	Q15466	nuclear receptor subfamily 0 group B member 2
NR1H3	Q13133	nuclear receptor subfamily 1 group H member 3
NR1H4	Q96RI1	nuclear receptor subfamily 1 group H member 4
NR1I2	O75469	nuclear receptor subfamily 1 group I member 2
NR2C2	P49116	nuclear receptor subfamily 2 group C member 2
NR3C2	P08235	nuclear receptor subfamily 3 group C member 2
NR4A1	P22736	nuclear receptor subfamily 4 group A member 1
NR5A1	Q13285	nuclear receptor subfamily 5 group A member 1
NRG4	Q8WWG1	neuregulin 4
NRK	Q7Z2Y5	Nik related kinase
NSA2	O95478	NSA2 ribosome biogenesis factor
NTN1	O95631	netrin 1
NTRK1	P04629	neurotrophic receptor tyrosine kinase 1
NTRK2	Q16620	neurotrophic receptor tyrosine kinase 2
NUAK1	O60285	NUAK family kinase 1
NUP62	P37198	nucleoporin 62
OGA	O60502	O-GlcNAcase
OGN	P20774	osteoglycin
OLR1	P78380	oxidized low density lipoprotein receptor 1
OPTN	Q96CV9	optineurin
OR10A4	Q9H209	olfactory receptor family 10 subfamily A member 4
ORAI1	Q96D31	ORAI calcium release-activated calcium modulator 1
P2RX7	Q99572	purinergic receptor P2X 7
PACSIN2	Q9UNF0	protein kinase C and casein kinase substrate in neurons 2
PAEP	P09466	progestagen associated endometrial protein
PALD1	Q9ULE6	phosphatase domain containing paladin 1
PALLD	Q8WX93	palladin, cytoskeletal associated protein
PAQR3	Q6TCH7	progestin and adipoQ receptor family member 3
PARN	O95453	poly(A)-specific ribonuclease
PARP1	P09874	poly(ADP-ribose) polymerase 1
PAX2	Q02962	paired box 2
PCSK1	P29120	proprotein convertase subtilisin/kexin type 1
PDE3A	Q14432	phosphodiesterase 3A
PDE5A	O76074	phosphodiesterase 5A
PDGFA	P04085	platelet derived growth factor subunit A
PDGFRA	P16234	platelet derived growth factor receptor alpha
PDGFRB	P09619	platelet derived growth factor receptor beta
PDK1	Q15118	pyruvate dehydrogenase kinase 1
PDPN	Q86YL7	podoplanin
PEA15	Q15121	proliferation and apoptosis adaptor protein 15
PEBP1	P30086	phosphatidylethanolamine binding protein 1
PECAM1	P16284	platelet and endothelial cell adhesion molecule 1
PES1	O00541	pescadillo ribosomal biogenesis factor 1
PGC	P20142	progastricsin
PHLPP1	O60346	PH domain and leucine rich repeat protein phosphatase 1
PIAS4	Q8N2W9	protein inhibitor of activated STAT 4
PICK1	Q9NRD5	protein interacting with PRKCA 1
PIK3C2B	O00750	phosphatidylinositol-4-phosphate 3-kinase catalytic subunit type 2 beta
PIK3CA	P42336	phosphatidylinositol-4,5-bisphosphate 3-kinase catalytic subunit alpha
PIK3CB	P42338	phosphatidylinositol-4,5-bisphosphate 3-kinase catalytic subunit beta
PIK3CD	O00329	phosphatidylinositol-4,5-bisphosphate 3-kinase catalytic subunit delta
PIK3CG	P48736	phosphatidylinositol-4,5-bisphosphate 3-kinase catalytic subunit gamma
PIK3R1	P27986	phosphoinositide-3-kinase regulatory subunit 1
PIK3R2	O00459	phosphoinositide-3-kinase regulatory subunit 2
PIN1	Q13526	peptidylprolyl cis/trans isomerase, NIMA-interacting 1
PITX2	Q99697	paired like homeodomain 2
PKD1	P98161	polycystin 1, transient receptor potential channel interacting
PKM	P14618	pyruvate kinase M1/2
PLA2G15	Q8NCC3	phospholipase A2 group XV
PLA2G1B	P04054	phospholipase A2 group IB
PLA2G7	Q13093	phospholipase A2 group VII
PLA2R1	Q13018	phospholipase A2 receptor 1
PLAU	P00749	plasminogen activator, urokinase
PLB1	Q6P1J6	phospholipase B1
PLEKHH2	Q8IVE3	pleckstrin homology, MyTH4 and FERM domain containing H2
PLEKHO1	Q53GL0	pleckstrin homology domain containing O1
PLG	P00747	plasminogen
PLIN2	Q99541	perilipin 2
PLK2	Q9NYY3	polo like kinase 2
PNO1	Q9NRX1	partner of NOB1 homolog
PNPLA2	Q96AD5	patatin like phospholipase domain containing 2
POLDIP2	Q9Y2S7	DNA polymerase delta interacting protein 2
PON1	P27169	paraoxonase 1
PON2	Q15165	paraoxonase 2
POSTN	Q15063	periostin
POTEF	A5A3E0	POTE ankyrin domain family member F
POU2F3	Q9UKI9	POU class 2 homeobox 3
PPARA	Q07869	peroxisome proliferator activated receptor alpha
PPARD	Q03181	peroxisome proliferator activated receptor delta
PPARG	P37231	peroxisome proliferator activated receptor gamma
PPARGC1A	Q9UBK2	PPARG coactivator 1 alpha
PPBP	P02775	pro-platelet basic protein
PPIA	P62937	peptidylprolyl isomerase A
PPIG	Q13427	peptidylprolyl isomerase G
PPP1R8	Q12972	protein phosphatase 1 regulatory subunit 8
PRKAA1	Q13131	protein kinase AMP-activated catalytic subunit alpha 1
PRKAA2	P54646	protein kinase AMP-activated catalytic subunit alpha 2
PRKAB1	Q9Y478	protein kinase AMP-activated non-catalytic subunit beta 1
PRKCA	P17252	protein kinase C alpha
PRKCB	P05771	protein kinase C beta
PRKCE	Q02156	protein kinase C epsilon
PRKCSH	P14314	protein kinase C substrate 80K-H
PRMT1	Q99873	protein arginine methyltransferase 1
PROC	P04070	protein C, inactivator of coagulation factors Va and VIIIa
PROS1	P07225	protein S
PRSS1	P07477	serine protease 1
PRSS2	P07478	serine protease 2
PRSS55	Q6UWB4	serine protease 55
PSMA6	P60900	proteasome 20S subunit alpha 6
PSMD9	O00233	proteasome 26S subunit, non-ATPase 9
PTAFR	P25105	platelet activating factor receptor
PTBP1	P26599	polypyrimidine tract binding protein 1
PTEN	P60484	phosphatase and tensin homolog
PTGDS	P41222	prostaglandin D2 synthase
PTGS1	P23219	prostaglandin-endoperoxide synthase 1
PTGS2	P35354	prostaglandin-endoperoxide synthase 2
PTH	P01270	parathyroid hormone
PTHLH	P12272	parathyroid hormone like hormone
PTK2	Q05397	protein tyrosine kinase 2
PTK2B	Q14289	protein tyrosine kinase 2 beta
PTPA	Q15257	protein phosphatase 2 phosphatase activator
PTPN11	Q06124	protein tyrosine phosphatase non-receptor type 11
PTPN2	P17706	protein tyrosine phosphatase non-receptor type 2
PTPN6	P29350	protein tyrosine phosphatase non-receptor type 6
PTX3	P26022	pentraxin 3
PYCARD	Q9ULZ3	PYD and CARD domain containing
RAB38	P57729	RAB38, member RAS oncogene family
RAB3A	P20336	RAB3A, member RAS oncogene family
RABGEF1	Q9UJ41	RAB guanine nucleotide exchange factor 1
RAC1	P63000	Rac family small GTPase 1
RAMP2	O60895	receptor activity modifying protein 2
RAP1A	P62834	RAP1A, member of RAS oncogene family
RAPGEF5	Q92565	Rap guanine nucleotide exchange factor 5
RARRES2	Q99969	retinoic acid receptor responder 2
RB1CC1	Q8TDY2	RB1 inducible coiled-coil 1
RBM45	Q8IUH3	RNA binding motif protein 45
RBMS3	Q6XE24	RNA binding motif single stranded interacting protein 3
RBP4	P02753	retinol binding protein 4
RBPJ	Q06330	recombination signal binding protein for immunoglobulin kappa J region
RCAN1	P53805	regulator of calcineurin 1
RCBTB1	Q8NDN9	RCC1 and BTB domain containing protein 1
RDX	P35241	radixin
RELA	Q04206	RELA proto-oncogene, NF-kB subunit
REM1	O75628	RRAD and GEM like GTPase 1
REN	P00797	renin
RENBP	P51606	renin binding protein
RETN	Q9HD89	resistin
RFC1	P35251	replication factor C subunit 1
RHBDF2	Q6PJF5	rhomboid 5 homolog 2
RIPK2	O43353	receptor interacting serine/threonine kinase 2
RIPK3	Q9Y572	receptor interacting serine/threonine kinase 3
RMC1	Q96DM3	regulator of MON1-CCZ1
RMDN1	Q96DB5	regulator of microtubule dynamics 1
RMDN2	Q96LZ7	regulator of microtubule dynamics 2
RMDN3	Q96TC7	regulator of microtubule dynamics 3
RNASE2	P10153	ribonuclease A family member 2
RNF185	Q96GF1	ring finger protein 185
RNF19A	Q9NV58	ring finger protein 19A, RBR E3 ubiquitin protein ligase
ROCK1	Q13464	Rho associated coiled-coil containing protein kinase 1
ROCK2	O75116	Rho associated coiled-coil containing protein kinase 2
ROS1	P08922	ROS proto-oncogene 1, receptor tyrosine kinase
RPL36A	P83881	ribosomal protein L36a
RPLP0	P05388	ribosomal protein lateral stalk subunit P0
RPS19	P39019	ribosomal protein S19
RPS27A	P62979	ribosomal protein S27a
RPS6	P62753	ribosomal protein S6
RRAS	P10301	RAS related
S100A4	P26447	S100 calcium binding protein A4
S100A8	P05109	S100 calcium binding protein A8
S100A9	P06702	S100 calcium binding protein A9
S100B	P04271	S100 calcium binding protein B
SAA1	P0DJI8	serum amyloid A1
SAA2	P0DJI9	serum amyloid A2
SASH1	O94885	SAM and SH3 domain containing 1
SCAF4	O95104	SR-related CTD associated factor 4
SCAF8	Q9UPN6	SR-related CTD associated factor 8
SCD	O00767	stearoyl-CoA desaturase
SDC2	P34741	syndecan 2
SELENBP1	Q13228	selenium binding protein 1
SELL	P14151	selectin L
SELP	P16109	selectin P
SEMA3A	Q14563	semaphorin 3A
SEMA6A	Q9H2E6	semaphorin 6A
SEPTIN7	Q16181	septin 7
SERPINB2	P05120	serpin family B member 2
SERPINE1	P05121	serpin family E member 1
SERPINF1	P36955	serpin family F member 1
SETD7	Q8WTS6	SET domain containing 7, histone lysine methyltransferase
SFI1	A8K8P3	SFI1 centrin binding protein
SGK1	O00141	serum/glucocorticoid regulated kinase 1
SHBG	P04278	sex hormone binding globulin
SI	P14410	sucrase-isomaltase
SIRT1	Q96EB6	sirtuin 1
SIRT3	Q9NTG7	sirtuin 3
SIRT4	Q9Y6E7	sirtuin 4
SIRT6	Q8N6T7	sirtuin 6
SIRT7	Q9NRC8	sirtuin 7
SKIL	P12757	SKI like proto-oncogene
SKP2	Q13309	S-phase kinase associated protein 2
SLBP	Q14493	stem-loop binding protein
SLC12A1	Q13621	solute carrier family 12 member 1
SLC12A3	P55017	solute carrier family 12 member 3
SLC16A3	O15427	solute carrier family 16 member 3
SLC17A5	Q9NRA2	solute carrier family 17 member 5
SLC22A2	O15244	solute carrier family 22 member 2
SLC22A3	O75751	solute carrier family 22 member 3
SLC22A6	Q4U2R8	solute carrier family 22 member 6
SLC22A8	Q8TCC7	solute carrier family 22 member 8
SLC2A1	P11166	solute carrier family 2 member 1
SLC2A12	Q8TD20	solute carrier family 2 member 12
SLC2A2	P11168	solute carrier family 2 member 2
SLC2A4	P14672	solute carrier family 2 member 4
SLC30A7	Q8NEW0	solute carrier family 30 member 7
SLC30A8	Q8IWU4	solute carrier family 30 member 8
SLC33A1	O00400	solute carrier family 33 member 1
SLC52A1	Q9NWF4	solute carrier family 52 member 1
SLC52A2	Q9HAB3	solute carrier family 52 member 2
SLC5A1	P13866	solute carrier family 5 member 1
SLC5A2	P31639	solute carrier family 5 member 2
SLC7A2	P52569	solute carrier family 7 member 2
SLC9A8	Q9Y2E8	solute carrier family 9 member A8
SLCO6A1	Q86UG4	solute carrier organic anion transporter family member 6A1
SLIT2	O94813	slit guidance ligand 2
SLPI	P03973	secretory leukocyte peptidase inhibitor
SMAD1	Q15797	SMAD family member 1
SMAD2	Q15796	SMAD family member 2
SMAD3	P84022	SMAD family member 3
SMAD5	Q99717	SMAD family member 5
SMAD6	O43541	SMAD family member 6
SMAD7	O15105	SMAD family member 7
SMG1	Q96Q15	SMG1 nonsense mediated mRNA decay associated PI3K related kinase
SMN1	Q16637	survival of motor neuron 1, telomeric
SMN2	Q16637	survival of motor neuron 2, centromeric
SMPDL3B	Q92485	sphingomyelin phosphodiesterase acid like 3B
SMURF2	Q9HAU4	SMAD specific E3 ubiquitin protein ligase 2
SNAI1	O95863	snail family transcriptional repressor 1
SNRNP70	P08621	small nuclear ribonucleoprotein U1 subunit 70
SOAT1	P35610	sterol O-acyltransferase 1
SOCS1	O15524	suppressor of cytokine signaling 1
SOCS2	O14508	suppressor of cytokine signaling 2
SOCS3	O14543	suppressor of cytokine signaling 3
SOCS5	O75159	suppressor of cytokine signaling 5
SOD1	P00441	superoxide dismutase 1
SOD2	P04179	superoxide dismutase 2
SOD3	P08294	superoxide dismutase 3
SORBS1	Q9BX66	sorbin and SH3 domain containing 1
SORD	Q00796	sorbitol dehydrogenase
SOS1	Q07889	SOS Ras/Rac guanine nucleotide exchange factor 1
SOST	Q9BQB4	sclerostin
SOSTDC1	Q6X4U4	sclerostin domain containing 1
SOX2	P48431	SRY-box transcription factor 2
SOX6	P35712	SRY-box transcription factor 6
SP1	P08047	Sp1 transcription factor
SPARC	P09486	secreted protein acidic and cysteine rich
SPHK1	Q9NYA1	sphingosine kinase 1
SPINK1	P00995	serine peptidase inhibitor Kazal type 1
SPP1	P10451	secreted phosphoprotein 1
SPZ1	Q9BXG8	spermatogenic leucine zipper 1
SQSTM1	Q13501	sequestosome 1
SREBF1	P36956	sterol regulatory element binding transcription factor 1
SREBF2	Q12772	sterol regulatory element binding transcription factor 2
SRGAP2	O75044	SLIT-ROBO Rho GTPase activating protein 2
SRRM2	Q9UQ35	serine/arginine repetitive matrix 2
SRXN1	Q9BYN0	sulfiredoxin 1
SRY	Q05066	sex determining region Y
ST3GAL4	Q11206	ST3 beta-galactoside alpha-2,3-sialyltransferase 4
STAM2	O75886	signal transducing adaptor molecule 2
STAP2	Q9UGK3	signal transducing adaptor family member 2
STAT1	P42224	signal transducer and activator of transcription 1
STAT3	P40763	signal transducer and activator of transcription 3
STAT5A	P42229	signal transducer and activator of transcription 5A
STAT5B	P51692	signal transducer and activator of transcription 5B
STC1	P52823	stanniocalcin 1
STIM1	Q13586	stromal interaction molecule 1
STIM2	Q9P246	stromal interaction molecule 2
STK11	Q15831	serine/threonine kinase 11
STS	P08842	steroid sulfatase
SUMO4	Q6EEV6	small ubiquitin like modifier 4
SUV39H1	O43463	suppressor of variegation 3-9 homolog 1
SYBU	Q9NX95	syntabulin
SYK	P43405	spleen associated tyrosine kinase
SYT1	P21579	synaptotagmin 1
SYVN1	Q86TM6	synoviolin 1
TALDO1	P37837	transaldolase 1
TAS2R13	Q9NYV9	taste 2 receptor member 13
TBC1D31	Q96DN5	TBC1 domain family member 31
TBX1	O43435	T-box transcription factor 1
TCF7	P36402	transcription factor 7
TCF7L2	Q9NQB0	transcription factor 7 like 2
TERF1	P54274	telomeric repeat binding factor 1
TERF2IP	Q9NYB0	TERF2 interacting protein
TET2	Q6N021	tet methylcytosine dioxygenase 2
TF	P02787	transferrin
TFG	Q92734	trafficking from ER to golgi regulator
TFPI	P10646	tissue factor pathway inhibitor
TFRC	P02786	transferrin receptor
TGFA	P01135	transforming growth factor alpha
TGFB1	P01137	transforming growth factor beta 1
TGFB2	P61812	transforming growth factor beta 2
TGFB3	P10600	transforming growth factor beta 3
TGFBI	Q15582	transforming growth factor beta induced
TGFBR1	P36897	transforming growth factor beta receptor 1
TGFBR2	P37173	transforming growth factor beta receptor 2
TGIF1	Q15583	TGFB induced factor homeobox 1
TGM2	P21980	transglutaminase 2
THBD	P07204	thrombomodulin
THBS1	P07996	thrombospondin 1
THG1L	Q9NWX6	tRNA-histidine guanylyltransferase 1 like
TIMM44	O43615	translocase of inner mitochondrial membrane 44
TIMP1	P01033	TIMP metallopeptidase inhibitor 1
TIMP2	P16035	TIMP metallopeptidase inhibitor 2
TIMP3	P35625	TIMP metallopeptidase inhibitor 3
TINAG	Q9UJW2	tubulointerstitial nephritis antigen
TKT	P29401	transketolase
TLR2	O60603	toll like receptor 2
TLR4	O00206	toll like receptor 4
TNF	P01375	tumor necrosis factor
TNFAIP1	Q13829	TNF alpha induced protein 1
TNFAIP8	O95379	TNF alpha induced protein 8
TNFRSF10D	Q9UBN6	TNF receptor superfamily member 10d
TNFRSF11B	O00300	TNF receptor superfamily member 11b
TNFRSF1A	P19438	TNF receptor superfamily member 1A
TNFRSF1B	P20333	TNF receptor superfamily member 1B
TNFSF10	P50591	TNF superfamily member 10
TNMD	Q9H2S6	tenomodulin
TNS2	Q63HR2	tensin 2
TP53	P04637	tumor protein p53
TPD52	P55327	tumor protein D52
TRAF5	O00463	TNF receptor associated factor 5
TRAF6	Q9Y4K3	TNF receptor associated factor 6
TRDN	Q13061	triadin
TREM1	Q9NP99	triggering receptor expressed on myeloid cells 1
TRH	P20396	thyrotropin releasing hormone
TRIAP1	O43715	TP53 regulated inhibitor of apoptosis 1
TRIB3	Q96RU7	tribbles pseudokinase 3
TRIM11	Q96F44	tripartite motif containing 11
TRIP10	Q15642	thyroid hormone receptor interactor 10
TRPC1	P48995	transient receptor potential cation channel subfamily C member 1
TRPC5	Q9UL62	transient receptor potential cation channel subfamily C member 5
TRPC6	Q9Y210	transient receptor potential cation channel subfamily C member 6
TSC1	Q92574	TSC complex subunit 1
TSC22D1	Q15714	TSC22 domain family member 1
TSPYL2	Q9H2G4	TSPY like 2
TUG1	A0A6I8PU40	taurine up-regulated 1
TWIST1	Q15672	twist family bHLH transcription factor 1
TXN	P10599	thioredoxin
TXNIP	Q9H3M7	thioredoxin interacting protein
TYRO3	Q06418	TYRO3 protein tyrosine kinase
UBE2V1	A5PLL7;Q13404	ubiquitin conjugating enzyme E2 V1
UBE4A	Q14139	ubiquitination factor E4A
UCA1	Q2VCE5	urothelial cancer associated 1
UCHL1	P09936	ubiquitin C-terminal hydrolase L1
UCP1	P25874	uncoupling protein 1
UCP2	P55851	uncoupling protein 2
UCP3	P55916	uncoupling protein 3
UGT8	Q16880	UDP glycosyltransferase 8
ULK1	O75385	unc-51 like autophagy activating kinase 1
UMOD	P07911	uromodulin
UNC13B	O14795	unc-13 homolog B
UTRN	P46939	utrophin
UTS2	O95399	urotensin 2
UTS2R	Q9UKP6	urotensin 2 receptor
VAC14	Q08AM6	VAC14 component of PIKFYVE complex
VASH1	Q7L8A9	vasohibin 1
VASH2	Q86V25	vasohibin 2
VAV1	P15498	vav guanine nucleotide exchange factor 1
VCAM1	P19320	vascular cell adhesion molecule 1
VCAN	P13611	versican
VDAC1	P21796	voltage dependent anion channel 1
VDAC2	P45880	voltage dependent anion channel 2
VDR	P11473	vitamin D receptor
VEGFA	P15692	vascular endothelial growth factor A
VEGFB	P49765	vascular endothelial growth factor B
VEGFC	P49767	vascular endothelial growth factor C
VIM	P08670	vimentin
VPS51	Q9UID3	VPS51 subunit of GARP complex
VSIG4	Q9Y279	V-set and immunoglobulin domain containing 4
VTN	P04004	vitronectin
VWF	P04275	von Willebrand factor
WARS1	P23381	tryptophanyl-tRNA synthetase 1
WDR83	Q9BRX9	WD repeat domain 83
WFS1	O76024	wolframin ER transmembrane glycoprotein
WNK1	Q9H4A3	WNK lysine deficient protein kinase 1
WT1	P19544	WT1 transcription factor
WWTR1	Q9GZV5	WW domain containing transcription regulator 1
XBP1	P17861	X-box binding protein 1
XDH	P47989	xanthine dehydrogenase
XPR1	Q9UBH6	xenotropic and polytropic retrovirus receptor 1
XRCC1	P18887	X-ray repair cross complementing 1
XYLT1	Q86Y38	xylosyltransferase 1
XYLT2	Q9H1B5	xylosyltransferase 2
YAP1	P46937	Yes associated protein 1
YBX1	P67809	Y-box binding protein 1
YWHAZ	P63104	tyrosine 3-monooxygenase/tryptophan 5-monooxygenase activation protein zeta
YY1	P25490	YY1 transcription factor
ZBTB16	Q05516	zinc finger and BTB domain containing 16
ZEB1	P37275	zinc finger E-box binding homeobox 1
ZEB2	O60315	zinc finger E-box binding homeobox 2
ZFP36	P26651	ZFP36 ring finger protein
ZGLP1	P0C6A0	zinc finger GATA like protein 1
ZNF236	Q9UL36	zinc finger protein 236
ZNF410	Q86VK4	zinc finger protein 410
ABCG5	Q9H222	ATP-binding cassette sub-family G member 5
BCL2L14	Q9BZR8	Apoptosis facilitator Bcl-2-like protein 14
C1orf112	Q9NSG2	Uncharacterized protein C1orf112
CDCA3	Q99618	Cell division cycle-associated protein 3
CLIC1	O00299	Chloride intracellular channel protein 1
COL4A3	Q01955	Collagen alpha-3
FUT1	P19526	Galactoside alpha-
GNB3	P16520	Guanine nucleotide-binding protein G
HPR	P00739	Haptoglobin-related protein
ICAM4	Q14773	Intercellular adhesion molecule 4
IGF2-AS	Q6U949	Putative insulin-like growth factor 2 antisense gene protein
INS-IGF2	F8WCM5	Insulin, isoform 2
KRTAP3-3	Q9BYR6	Keratin-associated protein 3-3
LDLR	P01130	Low-density lipoprotein receptor
LPAL2	Q16609	Putative apolipoprotein
PBX2	P40425	Pre-B-cell leukemia transcription factor 2
PCIF1	Q9H4Z3	mRNA
RPTOR	Q8N122	Regulatory-associated protein of mTOR
SELENOS	Q9BQE4	Selenoprotein S
SF3B3	Q15393	Splicing factor 3B subunit 3
SPACA6	W5XKT8	Sperm acrosome membrane-associated protein 6
STEAP1B	Q6NZ63	STEAP family member 1B
TAB2	Q9NYJ8	TGF-beta-activated kinase 1 and MAP3K7-binding protein 2
TBCD	Q9BTW9	Tubulin-specific chaperone D
TXNL4B	Q9NX01	Thioredoxin-like protein 4B
VEPH1	Q14D04	Ventricular zone-expressed PH domain-containing protein homolog 1
SLC15A1	P46059	Solute carrier family 15 member 1
SLC15A2	Q16348	Solute carrier family 15 member 2
UGT1A9	O60656	UDP-glucuronosyltransferase 1-9
UGT2B4	P06133	UDP-glucuronosyltransferase 2B4
CYP3A4	P08684	Cytochrome P450 3A4
ORM1	P02763	Alpha-1-acid glycoprotein 1
ABCB1	P08183	Multidrug resistance protein 1
ABCC2	Q92887	Canalicular multispecific organic anion transporter 1
ABCG2	Q9UNQ0	ATP-binding cassette sub-family G member 2
CYP2C9	P11712	Cytochrome P450 2C9
CYP2C8	P10632	Cytochrome P450 2C8
UGT1A3	P35503	UDP-glucuronosyltransferase 1-3
LTA4H	P09960	Leukotriene A-4 hydrolase
BDKRB1	P46663	B1 bradykinin receptor
SLC22A7	Q9Y694	Solute carrier family 22 member 7
SLCO1A2	P46721	Solute carrier organic anion transporter family member 1A2
ORM2	P19652	Alpha-1-acid glycoprotein 2
CYP2C19	P33261	Cytochrome P450 2C19
UGT1A1	P22309	UDP-glucuronosyltransferase 1-1
UGT1A10	Q9HAW8	UDP-glucuronosyltransferase 1-10
UGT2B7	P16662	UDP-glucuronosyltransferase 2B7
UGT2B17	O75795	UDP-glucuronosyltransferase 2B17
SLC22A12	Q96S37	Solute carrier family 22 member 12
SLC2A9	Q9NRM0	Solute carrier family 2, facilitated glucose transporter member 9
ABCB11	O95342	Bile salt export pump
SLCO1B3	Q9NPD5	Solute carrier organic anion transporter family member 1B3
SLCO1B1	Q9Y6L6	Solute carrier organic anion transporter family member 1B1
SFRP4	Q6FHJ7	Secreted frizzled-related protein 4
BCHE	P06276	Cholinesterase
CES1	P23141	Liver carboxylesterase 1
FGFR1	GC08M038400	Fibroblast Growth Factor Receptor 1
FGFR3	GC04P001795	Fibroblast Growth Factor Receptor 3
AKT2	GC19M040230	AKT Serine/Threonine Kinase 2
BRAF	GC07M140719	B-Raf Proto-Oncogene, Serine/Threonine Kinase
MET	GC07P116672	MET Proto-Oncogene, Receptor Tyrosine Kinase
CDK4	GC12M057743	Cyclin Dependent Kinase 4
ERBB2	GC17P039687	Erb-B2 Receptor Tyrosine Kinase 2
MAP2K1	GC15P066386	Mitogen-Activated Protein Kinase Kinase 1
FGFR2	GC10M121478	Fibroblast Growth Factor Receptor 2
CDK6	GC07M092604	Cyclin Dependent Kinase 6
RAF1	GC03M012583	Raf-1 Proto-Oncogene, Serine/Threonine Kinase
AR	GC0XP067544	Androgen Receptor
PRKCD	GC03P053156	Protein Kinase C Delta
RET	GC10P043081	Ret Proto-Oncogene
BTK	GC0XM101349	Bruton Tyrosine Kinase
KIT	GC04P054657	KIT Proto-Oncogene, Receptor Tyrosine Kinase
HRAS	GC11M000635	HRas Proto-Oncogene, GTPase
TLR3	GC04P186059	Toll Like Receptor 3
CCND1	GC11P069641	Cyclin D1
DDC	GC07M050458	Dopa Decarboxylase
CREBBP	GC16M003726	CREB Binding Protein
EPHB4	GC07M100803	EPH Receptor B4
IDH2	GC15M090083	Isocitrate Dehydrogenase (NADP(+)) 2
IDH1	GC02M208236	Isocitrate Dehydrogenase (NADP(+)) 1
CDK2	GC12P055966	Cyclin Dependent Kinase 2
RAD51	GC15P040694	RAD51 Recombinase
CHUK	GC10M100188	Component Of Inhibitor Of Nuclear Factor Kappa B Kinase Complex
ABL1	GC09P130713	ABL Proto-Oncogene 1, Non-Receptor Tyrosine Kinase
AKT3	GC01M243488	AKT Serine/Threonine Kinase 3
FLT3	GC13M028003	Fms Related Receptor Tyrosine Kinase 3
PPP3CA	GC04M101024	Protein Phosphatase 3 Catalytic Subunit Alpha
NFKB2	GC10P102394	Nuclear Factor Kappa B Subunit 2
BLK	GC08P011486	BLK Proto-Oncogene, Src Family Tyrosine Kinase
HK1	GC10P069269	Hexokinase 1
TH	GC11M002163	Tyrosine Hydroxylase
GAD1	GC02P170813	Glutamate Decarboxylase 1
CFTR	GC07P117287	CF Transmembrane Conductance Regulator
PTPN1	GC20P050510	Protein Tyrosine Phosphatase Non-Receptor Type 1
SRC	GC20P037344	SRC Proto-Oncogene, Non-Receptor Tyrosine Kinase
APP	GC21M025880	Amyloid Beta Precursor Protein
PRKAR1A	GC17P068414	Protein Kinase CAMP-Dependent Type I Regulatory Subunit Alpha
KRAS	GC12M025204	KRAS Proto-Oncogene, GTPase
PTPRC	GC01P198607	Protein Tyrosine Phosphatase Receptor Type C
COMT	GC22P019941	Catechol-O-Methyltransferase
MAPK10	GC04M085990	Mitogen-Activated Protein Kinase 10
ADA	GC20M044620	Adenosine Deaminase
SLC9A1	GC01M027109	Solute Carrier Family 9 Member A1
MMP14	GC14P025277	Matrix Metallopeptidase 14
MYC	GC08P127735	MYC Proto-Oncogene, BHLH Transcription Factor
LDHA	GC11P018394	Lactate Dehydrogenase A
PRKACA	GC19M014092	Protein Kinase CAMP-Activated Catalytic Subunit Alpha
TERT	GC05M001253	Telomerase Reverse Transcriptase
CA2	GC08P085463	Carbonic Anhydrase 2
ALK	GC02M029156	ALK Receptor Tyrosine Kinase
CALR	GC19P012938	Calreticulin
HDAC6	GC0XP048801	Histone Deacetylase 6
PCNA	GC20M005114	Proliferating Cell Nuclear Antigen
JAK3	GC19M017824	Janus Kinase 3
ZAP70	GC02P097696	Zeta Chain Of T Cell Receptor Associated Protein Kinase 70
BMPR1A	GC10P086756	Bone Morphogenetic Protein Receptor Type 1A
NT5E	GC06P085449	5'-Nucleotidase Ecto
IL2RA	GC10M006010	Interleukin 2 Receptor Subunit Alpha
FOS	GC14P075278	Fos Proto-Oncogene, AP-1 Transcription Factor Subunit
CASR	GC03P122183	Calcium Sensing Receptor
GNAS	GC20P058839	GNAS Complex Locus
TSC2	GC16P002436	TSC Complex Subunit 2
SHH	GC07M155799	Sonic Hedgehog Signaling Molecule
NGF	GC01M115285	Nerve Growth Factor
CASP1	GC11M105025	Caspase 1
SNCA	GC04M089724	Synuclein Alpha
NR3C1	GC05M143277	Nuclear Receptor Subfamily 3 Group C Member 1
MAPT	GC17P045894	Microtubule Associated Protein Tau
PDGFB	GC22M045657	Platelet Derived Growth Factor Subunit B
NRAS	GC01M114704	NRAS Proto-Oncogene, GTPase
CDH1	GC16P068737	Cadherin 1
TEK	GC09P027109	TEK Receptor Tyrosine Kinase
SMAD4	GC18P051028	SMAD Family Member 4
CACNA1H	GC16P001153	Calcium Voltage-Gated Channel Subunit Alpha1 H
DRD2	GC11M113409	Dopamine Receptor D2
FTH1	GC11M061959	Ferritin Heavy Chain 1
YWHAE	GC17M001346	Tyrosine 3-Monooxygenase/Tryptophan 5-Monooxygenase Activation Protein Epsilon
DBH	GC09P133636	Dopamine Beta-Hydroxylase
MERTK	GC02P111898	MER Proto-Oncogene, Tyrosine Kinase
ITGB2	GC21M044885	Integrin Subunit Beta 2
PRKD1	GC14M029576	Protein Kinase D1
SMARCA4	GC19P010932	SWI/SNF Related, Matrix Associated, Actin Dependent Regulator Of Chromatin, Subfamily A, Member 4
TNFRSF10B	GC08M023020	TNF Receptor Superfamily Member 10b
PGR	GC11M100943	Progesterone Receptor
CCND2	GC12P008103	Cyclin D2
ITGB1	GC10M032900	Integrin Subunit Beta 1
PRKAG2	GC07M151556	Protein Kinase AMP-Activated Non-Catalytic Subunit Gamma 2
ESRRB	GC14P076310	Estrogen Related Receptor Beta
BMPR2	GC02P202376	Bone Morphogenetic Protein Receptor Type 2
ALPL	GC01P021508	Alkaline Phosphatase, Biomineralization Associated
CSNK1D	GC17M082239	Casein Kinase 1 Delta
GRIA3	GC0XP123184	Glutamate Ionotropic Receptor AMPA Type Subunit 3
TBXAS1	GC07P139777	Thromboxane A Synthase 1
IFNGR1	GC06M137197	Interferon Gamma Receptor 1
RARB	GC03P024830	Retinoic Acid Receptor Beta
RARA	GC17P040309	Retinoic Acid Receptor Alpha
VLDLR	GC09P002611	Very Low Density Lipoprotein Receptor
STAT6	GC12M057095	Signal Transducer And Activator Of Transcription 6
PTH1R	GC03P046877	Parathyroid Hormone 1 Receptor
CBL	GC11P119206	Cbl Proto-Oncogene
ADK	GC10P074152	Adenosine Kinase
LYN	GC08P055879	LYN Proto-Oncogene, Src Family Tyrosine Kinase
ACTN1	GC14M068874	Actinin Alpha 1
BMPR1B	GC04P094757	Bone Morphogenetic Protein Receptor Type 1B
TTR	GC18P031557	Transthyretin
CD4	GC12P006786	CD4 Molecule
ESR2	GC14M064084	Estrogen Receptor 2
GATA3	GC10P008045	GATA Binding Protein 3
TRPV4	GC12M109783	Transient Receptor Potential Cation Channel Subfamily V Member 4
PSMB8	GC06M032840	Proteasome 20S Subunit Beta 8
PBX1	GC01P164524	PBX Homeobox 1
RPS6KB1	GC17P059893	Ribosomal Protein S6 Kinase B1
PLAT	GC08M042174	Plasminogen Activator, Tissue Type
GYS1	GC19M048970	Glycogen Synthase 1
EDNRB	GC13M077895	Endothelin Receptor Type B
LIMK1	GC07P074082	LIM Domain Kinase 1
SERPINA1	GC14M094376	Serpin Family A Member 1
CD19	GC16P029083	CD19 Molecule
XIAP	GC0XP123859	X-Linked Inhibitor Of Apoptosis
HDAC1	GC01P032292	Histone Deacetylase 1
DNM2	GC19P010718	Dynamin 2
SMARCA2	GC09P001980	SWI/SNF Related, Matrix Associated, Actin Dependent Regulator Of Chromatin, Subfamily A, Member 2
RB1	GC13P048303	RB Transcriptional Corepressor 1
PRDX1	GC01M045511	Peroxiredoxin 1
KCNMA1	GC10M076869	Potassium Calcium-Activated Channel Subfamily M Alpha 1
PLA2G4A	GC01P186798	Phospholipase A2 Group IVA
ITGA6	GC02P172427	Integrin Subunit Alpha 6
ATP1A1	GC01P116372	ATPase Na+/K+ Transporting Subunit Alpha 1
ANXA1	GC09P073151	Annexin A1
TBK1	GC12P064451	TANK Binding Kinase 1
MYL2	GC12M110910	Myosin Light Chain 2
CD247	GC01M167399	CD247 Molecule
DHFR	GC05M080626	Dihydrofolate Reductase
RIPK1	GC06P003064	Receptor Interacting Serine/Threonine Kinase 1
GRIN1	GC09P137138	Glutamate Ionotropic Receptor NMDA Type Subunit 1
POMC	GC02M025160	Proopiomelanocortin
ADRB2	GC05P148825	Adrenoceptor Beta 2
F2	GC11P046720	Coagulation Factor II, Thrombin
DMPK	GC19M045769	DM1 Protein Kinase
HPRT1	GC0XP134460	Hypoxanthine Phosphoribosyltransferase 1
NAMPT	GC07M106248	Nicotinamide Phosphoribosyltransferase
GAPDH	GC12P008161	Glyceraldehyde-3-Phosphate Dehydrogenase
TPO	GC02P001374	Thyroid Peroxidase
GLA	GC0XM101393	Galactosidase Alpha
CD40	GC20P046118	CD40 Molecule
PCK1	GC20P057561	Phosphoenolpyruvate Carboxykinase 1
BLM	GC15P090717	BLM RecQ Like Helicase
CYCS	GC07M025118	Cytochrome C, Somatic
SERPINC1	GC01M174153	Serpin Family C Member 1
NR1H2	GC19P050329	Nuclear Receptor Subfamily 1 Group H Member 2
PDCD1	GC02M241849	Programmed Cell Death 1
HSP90AA1	GC14M102080	Heat Shock Protein 90 Alpha Family Class A Member 1
BAX	GC19P048954	BCL2 Associated X, Apoptosis Regulator
LIG4	GC13M108207	DNA Ligase 4
AHR	GC07P016916	Aryl Hydrocarbon Receptor
PRKCZ	GC01P002050	Protein Kinase C Zeta
SCNN1B	GC16P023278	Sodium Channel Epithelial 1 Subunit Beta
GSN	GC09P121201	Gelsolin
WAS	GC0XP048676	WASP Actin Nucleation Promoting Factor
CYP2D6	GC22M042126	Cytochrome P450 Family 2 Subfamily D Member 6
CTSK	GC01M150796	Cathepsin K
NR2F2	GC15P096325	Nuclear Receptor Subfamily 2 Group F Member 2
SLC2A3	GC12M007919	Solute Carrier Family 2 Member 3
ITGA4	GC02P181456	Integrin Subunit Alpha 4
ANPEP	GC15M089784	Alanyl Aminopeptidase, Membrane
KCNN4	GC19M043767	Potassium Calcium-Activated Channel Subfamily N Member 4
CBS	GC21M043053	Cystathionine Beta-Synthase
MVK	GC12P109573	Mevalonate Kinase
TNNI3	GC19M055151	Troponin I3, Cardiac Type
PDPK1	GC16P002537	3-Phosphoinositide Dependent Protein Kinase 1
TOP1	GC20P041028	DNA Topoisomerase I
IRF5	GC07P128937	Interferon Regulatory Factor 5
DGKE	GC17P056834	Diacylglycerol Kinase Epsilon
ALOX5	GC10P045374	Arachidonate 5-Lipoxygenase
IL2RB	GC22M037125	Interleukin 2 Receptor Subunit Beta
ASS1	GC09P130444	Argininosuccinate Synthase 1
CYP11B1	GC08M142872	Cytochrome P450 Family 11 Subfamily B Member 1
TNNT2	GC01M201359	Troponin T2, Cardiac Type
ADRB1	GC10P114044	Adrenoceptor Beta 1
TUBA1A	GC12M049184	Tubulin Alpha 1a
RAB27A	GC15M055202	RAB27A, Member RAS Oncogene Family
GLB1	GC03M033013	Galactosidase Beta 1
ANXA2	GC15M060347	Annexin A2
ABCA3	GC16M002275	ATP Binding Cassette Subfamily A Member 3
PGM1	GC01P063593	Phosphoglucomutase 1
CYP11A1	GC15M074337	Cytochrome P450 Family 11 Subfamily A Member 1
SLC6A2	GC16P055656	Solute Carrier Family 6 Member 2
TNC	GC09M115019	Tenascin C
GSK3A	GC19M042230	Glycogen Synthase Kinase 3 Alpha
ITGB4	GC17P075721	Integrin Subunit Beta 4
F12	GC05M177402	Coagulation Factor XII
ITGA5	GC12M054396	Integrin Subunit Alpha 5
CYP1B1	GC02M038034	Cytochrome P450 Family 1 Subfamily B Member 1
GRIA1	GC05P153467	Glutamate Ionotropic Receptor AMPA Type Subunit 1
CALCR	GC07M093424	Calcitonin Receptor
MST1R	GC03M049958	Macrophage Stimulating 1 Receptor
FYN	GC06M111660	FYN Proto-Oncogene, Src Family Tyrosine Kinase
FES	GC15P090883	FES Proto-Oncogene, Tyrosine Kinase
EXT1	GC08M117798	Exostosin Glycosyltransferase 1
PLD1	GC03M171600	Phospholipase D1
MAX	GC14M065009	MYC Associated Factor X
EGLN1	GC01M231363	Egl-9 Family Hypoxia Inducible Factor 1
PTGER2	GC14P052314	Prostaglandin E Receptor 2
CDH11	GC16M064882	Cadherin 11
CHRM2	GC07P136868	Cholinergic Receptor Muscarinic 2
PIP5K1C	GC19M003631	Phosphatidylinositol-4-Phosphate 5-Kinase Type 1 Gamma
PDX1	GC13P027921	Pancreatic And Duodenal Homeobox 1
IFIH1	GC02M162267	Interferon Induced With Helicase C Domain 1
GATA6	GC18P022169	GATA Binding Protein 6
MUC1	GC01M155185	Mucin 1, Cell Surface Associated
TLR5	GC01M223109	Toll Like Receptor 5
FGA	GC04M154583	Fibrinogen Alpha Chain
RHO	GC03P130619	Rhodopsin
PAX6	GC11M031784	Paired Box 6
GFAP	GC17M044905	Glial Fibrillary Acidic Protein
LCAT	GC16M067939	Lecithin-Cholesterol Acyltransferase
FASLG	GC01P172628	Fas Ligand
PMM2	GC16P008788	Phosphomannomutase 2
HSPD1	GC02M197486	Heat Shock Protein Family D (Hsp60) Member 1
CDKN1C	GC11M002887	Cyclin Dependent Kinase Inhibitor 1C
CD28	GC02P203706	CD28 Molecule
TLR1	GC04M038797	Toll Like Receptor 1
HK2	GC02P074833	Hexokinase 2
TAP1	GC06M032865	Transporter 1, ATP Binding Cassette Subfamily B Member
TNFSF11	GC13P042562	TNF Superfamily Member 11
TLR8	GC0XP012924	Toll Like Receptor 8
HTR1A	GC05M063960	5-Hydroxytryptamine Receptor 1A
FGF8	GC10M101770	Fibroblast Growth Factor 8
PLCG1	GC20P041136	Phospholipase C Gamma 1
GJB2	GC13M020187	Gap Junction Protein Beta 2
IL7R	GC05P035852	Interleukin 7 Receptor
KCNJ1	GC11M128741	Potassium Inwardly Rectifying Channel Subfamily J Member 1
PIK3C2A	GC11M017191	Phosphatidylinositol-4-Phosphate 3-Kinase Catalytic Subunit Type 2 Alpha
PKLR	GC01M155289	Pyruvate Kinase L/R
ESRRA	GC11P064305	Estrogen Related Receptor Alpha
GUSB	GC07M065960	Glucuronidase Beta
TSHR	GC14P080954	Thyroid Stimulating Hormone Receptor
ENO1	GC01M008861	Enolase 1
GDNF	GC05M037812	Glial Cell Derived Neurotrophic Factor
NRP1	GC10M033177	Neuropilin 1
CD3D	GC11M118338	CD3d Molecule
CDH5	GC16P066366	Cadherin 5
CYP1A1	GC15M074719	Cytochrome P450 Family 1 Subfamily A Member 1
KLKB1	GC04P186208	Kallikrein B1
RYR1	GC19P038528	Ryanodine Receptor 1
ACP5	GC19M011574	Acid Phosphatase 5, Tartrate Resistant
SCNN1A	GC12M006346	Sodium Channel Epithelial 1 Subunit Alpha
VHL	GC03P010211	Von Hippel-Lindau Tumor Suppressor
AXIN1	GC16M000287	Axin 1
CDKN2B	GC09M022002	Cyclin Dependent Kinase Inhibitor 2B
PNLIP	GC10P116545	Pancreatic Lipase
LBR	GC01M225401	Lamin B Receptor
DRD5	GC04P009783	Dopamine Receptor D5
SDHB	GC01M017020	Succinate Dehydrogenase Complex Iron Sulfur Subunit B
F7	GC13P113105	Coagulation Factor VII
HSPA8	GC11M123057	Heat Shock Protein Family A (Hsp70) Member 8
GBA	GC01M155234	Glucosylceramidase Beta
CEBPA	GC19M033299	CCAAT Enhancer Binding Protein Alpha
DDX58	GC09M032455	DExD/H-Box Helicase 58
RUNX2	GC06P047549	RUNX Family Transcription Factor 2
CD55	GC01P207321	CD55 Molecule (Cromer Blood Group)
ECE1	GC01M021217	Endothelin Converting Enzyme 1
SLC6A4	GC17M030194	Solute Carrier Family 6 Member 4
LIFR	GC05M038475	LIF Receptor Subunit Alpha
SOX9	GC17P072121	SRY-Box Transcription Factor 9
SLC18A2	GC10P117241	Solute Carrier Family 18 Member A2
MCL1	GC01M150707	MCL1 Apoptosis Regulator, BCL2 Family Member
CA4	GC17P060149	Carbonic Anhydrase 4
OTC	GC0XP038353	Ornithine Carbamoyltransferase
MAT1A	GC10M080271	Methionine Adenosyltransferase 1A
OAT	GC10M124397	Ornithine Aminotransferase
BCL2L1	GC20M031664	BCL2 Like 1
ARSA	GC22M050622	Arylsulfatase A
USP7	GC16M008892	Ubiquitin Specific Peptidase 7
PRNP	GC20P004686	Prion Protein
SLC3A1	GC02P044275	Solute Carrier Family 3 Member 1
SLC7A7	GC14M022773	Solute Carrier Family 7 Member 7
GHSR	GC03M172443	Growth Hormone Secretagogue Receptor
SMPD1	GC11P006390	Sphingomyelin Phosphodiesterase 1
AQP3	GC09M033431	Aquaporin 3 (Gill Blood Group)
SLC11A2	GC12M050952	Solute Carrier Family 11 Member 2
DVL1	GC01M001335	Dishevelled Segment Polarity Protein 1
CHAT	GC10P049609	Choline O-Acetyltransferase
WNT4	GC01M022190	Wnt Family Member 4
UBE3A	GC15M025333	Ubiquitin Protein Ligase E3A
LAMB1	GC07M107923	Laminin Subunit Beta 1
EIF4EBP1	GC08P038007	Eukaryotic Translation Initiation Factor 4E Binding Protein 1
MITF	GC03P069788	Melanocyte Inducing Transcription Factor
POU5F1	GC06M031184	POU Class 5 Homeobox 1
SLC4A1	GC17M044282	Solute Carrier Family 4 Member 1 (Diego Blood Group)
MECOM	GC03M169083	MDS1 And EVI1 Complex Locus
PAX3	GC02M222199	Paired Box 3
LRP1	GC12P057128	LDL Receptor Related Protein 1
TRAF3	GC14P104639	TNF Receptor Associated Factor 3
FUCA1	GC01M023845	Alpha-L-Fucosidase 1
DIABLO	GC12M122208	Diablo IAP-Binding Mitochondrial Protein
GNA11	GC19P003094	G Protein Subunit Alpha 11
TUBG1	GC17P042609	Tubulin Gamma 1
SLC9A3	GC05M000472	Solute Carrier Family 9 Member A3
SSTR2	GC17P073165	Somatostatin Receptor 2
IRF3	GC19M049659	Interferon Regulatory Factor 3
GCH1	GC14M054842	GTP Cyclohydrolase 1
IL4R	GC16P027325	Interleukin 4 Receptor
ATP1A2	GC01P160115	ATPase Na+/K+ Transporting Subunit Alpha 2
CCR3	GC03P046227	C-C Motif Chemokine Receptor 3
CTBP1	GC04M001211	C-Terminal Binding Protein 1
EDN3	GC20P059300	Endothelin 3
NFATC1	GC18P079395	Nuclear Factor Of Activated T Cells 1
COL3A1	GC02P188974	Collagen Type III Alpha 1 Chain
LIPA	GC10M089213	Lipase A, Lysosomal Acid Type
TXNRD1	GC12P104215	Thioredoxin Reductase 1
CCNB1	GC05P069167	Cyclin B1
APAF1	GC12P098645	Apoptotic Peptidase Activating Factor 1
ITGB6	GC02M160099	Integrin Subunit Beta 6
TYMS	GC18P000657	Thymidylate Synthetase
OGG1	GC03P009751	8-Oxoguanine DNA Glycosylase
CLDN1	GC03M190305	Claudin 1
CYP3A5	GC07M099648	Cytochrome P450 Family 3 Subfamily A Member 5
ACTA1	GC01M229431	Actin Alpha 1, Skeletal Muscle
CYP2A6	GC19M040843	Cytochrome P450 Family 2 Subfamily A Member 6
ODC1	GC02M010432	Ornithine Decarboxylase 1
VCL	GC10P073995	Vinculin
FAH	GC15P080152	Fumarylacetoacetate Hydrolase
PAK1	GC11M077321	P21 (RAC1) Activated Kinase 1
CSNK2B	GC06P047308	Casein Kinase 2 Beta
CYP2B6	GC19P040991	Cytochrome P450 Family 2 Subfamily B Member 6
ADORA2B	GC17P015927	Adenosine A2b Receptor
DDR1	GC06P047288	Discoidin Domain Receptor Tyrosine Kinase 1
IKZF1	GC07P050303	IKAROS Family Zinc Finger 1
NCF2	GC01M183555	Neutrophil Cytosolic Factor 2
CD81	GC11P002377	CD81 Molecule
AK1	GC09M127866	Adenylate Kinase 1
CCND3	GC06M041934	Cyclin D3
NUMB	GC14M073275	NUMB Endocytic Adaptor Protein
SETD2	GC03M047033	SET Domain Containing 2, Histone Lysine Methyltransferase
SCP2	GC01P052927	Sterol Carrier Protein 2
MAT2A	GC02P085538	Methionine Adenosyltransferase 2A
PTGIR	GC19M046611	Prostaglandin I2 Receptor
CD79B	GC17M063928	CD79b Molecule
GSS	GC20M034928	Glutathione Synthetase
FCGR2B	GC01P161663	Fc Fragment Of IgG Receptor IIb
MTNR1B	GC11P092969	Melatonin Receptor 1B
CEL	GC09P133061	Carboxyl Ester Lipase
PTPN22	GC01M113813	Protein Tyrosine Phosphatase Non-Receptor Type 22
CD79A	GC19P041877	CD79a Molecule
GAD2	GC10P026216	Glutamate Decarboxylase 2
SLC19A2	GC01M169463	Solute Carrier Family 19 Member 2
MEN1	GC11M064803	Menin 1
GGT1	GC22P024927	Gamma-Glutamyltransferase 1
HLA-A	GC06P047265	Major Histocompatibility Complex, Class I, A
CD8A	GC02M086784	CD8a Molecule
PKD2	GC04P088007	Polycystin 2, Transient Receptor Potential Cation Channel
PCK2	GC14P024094	Phosphoenolpyruvate Carboxykinase 2, Mitochondrial
TLR7	GC0XP012867	Toll Like Receptor 7
GRHPR	GC09P037412	Glyoxylate And Hydroxypyruvate Reductase
MASP1	GC03M187216	Mannan Binding Lectin Serine Peptidase 1
F9	GC0XP139530	Coagulation Factor IX
PSMB9	GC06P047342	Proteasome 20S Subunit Beta 9
SPRY2	GC13M080335	Sprouty RTK Signaling Antagonist 2
PDE11A	GC02M177624	Phosphodiesterase 11A
L1CAM	GC0XM153864	L1 Cell Adhesion Molecule
MYOD1	GC11P017741	Myogenic Differentiation 1
PRPS1	GC0XP107628	Phosphoribosyl Pyrophosphate Synthetase 1
ATF4	GC22P039525	Activating Transcription Factor 4
TRPV1	GC17M003565	Transient Receptor Potential Cation Channel Subfamily V Member 1
DMD	GC0XM031047	Dystrophin
SLC4A4	GC04P071063	Solute Carrier Family 4 Member 4
ALAD	GC09M113386	Aminolevulinate Dehydratase
BAD	GC11M064273	BCL2 Associated Agonist Of Cell Death
TYMP	GC22M050525	Thymidine Phosphorylase
ANXA5	GC04M121667	Annexin A5
SCNN1G	GC16P023182	Sodium Channel Epithelial 1 Subunit Gamma
CFI	GC04M109740	Complement Factor I
TCF4	GC18M055222	Transcription Factor 4
MTR	GC01P236795	5-Methyltetrahydrofolate-Homocysteine Methyltransferase
ACADS	GC12P120843	Acyl-CoA Dehydrogenase Short Chain
RHOA	GC03M049359	Ras Homolog Family Member A
FEN1	GC11P061811	Flap Structure-Specific Endonuclease 1
CFLAR	GC02P201117	CASP8 And FADD Like Apoptosis Regulator
PSAP	GC10M071816	Prosaposin
TNFRSF13B	GC17M016929	TNF Receptor Superfamily Member 13B
HDAC9	GC07P018086	Histone Deacetylase 9
NEDD4L	GC18P058044	NEDD4 Like E3 Ubiquitin Protein Ligase
SLC19A3	GC02M227685	Solute Carrier Family 19 Member 3
CTCF	GC16P067563	CCCTC-Binding Factor
REL	GC02P060881	REL Proto-Oncogene, NF-KB Subunit
ALPP	GC02P232378	Alkaline Phosphatase, Placental
IRF7	GC11M000612	Interferon Regulatory Factor 7
DRD4	GC11P000660	Dopamine Receptor D4
BIRC3	GC11P102317	Baculoviral IAP Repeat Containing 3
CASP4	GC11M104942	Caspase 4
ELANE	GC19P000854	Elastase, Neutrophil Expressed
PARP2	GC14P020343	Poly(ADP-Ribose) Polymerase 2
KLK3	GC19P050854	Kallikrein Related Peptidase 3
NME2	GC17P051165	NME/NM23 Nucleoside Diphosphate Kinase 2
CUL3	GC02M224470	Cullin 3
PAX5	GC09M036828	Paired Box 5
PAX8	GC02M113215	Paired Box 8
MSR1	GC08M016107	Macrophage Scavenger Receptor 1
MAN1B1	GC09P137086	Mannosidase Alpha Class 1B Member 1
TRPV6	GC07M142871	Transient Receptor Potential Cation Channel Subfamily V Member 6
HSD3B2	GC01P119414	Hydroxy-Delta-5-Steroid Dehydrogenase, 3 Beta- And Steroid Delta-Isomerase 2
DCC	GC18P052340	DCC Netrin 1 Receptor
ILK	GC11P006581	Integrin Linked Kinase
RASGRP1	GC15M038488	RAS Guanyl Releasing Protein 1
ITGA3	GC17P050055	Integrin Subunit Alpha 3
IL5RA	GC03M003066	Interleukin 5 Receptor Subunit Alpha
DAG1	GC03P049482	Dystroglycan 1
CDK7	GC05P069243	Cyclin Dependent Kinase 7
ITGAV	GC02P186589	Integrin Subunit Alpha V
CD46	GC01P207752	CD46 Molecule
WNT1	GC12P049053	Wnt Family Member 1
NEFL	GC08M024950	Neurofilament Light
SLC12A5	GC20P046021	Solute Carrier Family 12 Member 5
WEE1	GC11P009573	WEE1 G2 Checkpoint Kinase
KAT5	GC11P065711	Lysine Acetyltransferase 5
EGLN3	GC14M033924	Egl-9 Family Hypoxia Inducible Factor 3
MS4A1	GC11P060474	Membrane Spanning 4-Domains A1
GAMT	GC19M001397	Guanidinoacetate N-Methyltransferase
PAK2	GC03P196739	P21 (RAC1) Activated Kinase 2
PRDX6	GC01P173477	Peroxiredoxin 6
CTLA4	GC02P203867	Cytotoxic T-Lymphocyte Associated Protein 4
ADRB3	GC08M037962	Adrenoceptor Beta 3
AGPAT2	GC09M136673	1-Acylglycerol-3-Phosphate O-Acyltransferase 2
MC4R	GC18M060371	Melanocortin 4 Receptor
WRN	GC08P031033	WRN RecQ Like Helicase
PCBD1	GC10M070882	Pterin-4 Alpha-Carbinolamine Dehydratase 1
APPL1	GC03P057227	Adaptor Protein, Phosphotyrosine Interacting With PH Domain And Leucine Zipper 1
PRODH	GC22M018912	Proline Dehydrogenase 1
HBB	GC11M005352	Hemoglobin Subunit Beta
HMGCR	GC05P075336	3-Hydroxy-3-Methylglutaryl-CoA Reductase
ITPR3	GC06P033620	Inositol 1,4,5-Trisphosphate Receptor Type 3
TLR9	GC03M052222	Toll Like Receptor 9
LMX1B	GC09P126614	LIM Homeobox Transcription Factor 1 Beta
CFH	GC01P196621	Complement Factor H
POLG	GC15M089316	DNA Polymerase Gamma, Catalytic Subunit
IGF2R	GC06P159969	Insulin Like Growth Factor 2 Receptor
CYP21A2	GC06P047333	Cytochrome P450 Family 21 Subfamily A Member 2
CYP1A2	GC15P074748	Cytochrome P450 Family 1 Subfamily A Member 2
LNPEP	GC05P096935	Leucyl And Cystinyl Aminopeptidase
ERN1	GC17M064039	Endoplasmic Reticulum To Nucleus Signaling 1
F8	GC0XM154835	Coagulation Factor VIII
FOXA2	GC20M022581	Forkhead Box A2
F3	GC01M094530	Coagulation Factor III, Tissue Factor
AGXT	GC02P240868	Alanine--Glyoxylate And Serine--Pyruvate Aminotransferase
ISL1	GC05P051383	ISL LIM Homeobox 1
CFB	GC06P031945	Complement Factor B
CD151	GC11P000895	CD151 Molecule (Raph Blood Group)
PSTPIP1	GC15P076993	Proline-Serine-Threonine Phosphatase Interacting Protein 1
MAF	GC16M079204	MAF BZIP Transcription Factor
FBN1	GC15M048408	Fibrillin 1
TNFRSF10A	GC08M023190	TNF Receptor Superfamily Member 10a
GZMB	GC14M024630	Granzyme B
OAS1	GC12P112906	2'-5'-Oligoadenylate Synthetase 1
CIITA	GC16P010879	Class II Major Histocompatibility Complex Transactivator
TNFRSF11A	GC18P062325	TNF Receptor Superfamily Member 11a
NDUFS8	GC11P068030	NADH:Ubiquinone Oxidoreductase Core Subunit S8
POMGNT1	GC01M046188	Protein O-Linked Mannose N-Acetylglucosaminyltransferase 1 (Beta 1,2-)
SCARB1	GC12M124776	Scavenger Receptor Class B Member 1
SMURF1	GC07M099027	SMAD Specific E3 Ubiquitin Protein Ligase 1
AFP	GC04P073431	Alpha Fetoprotein
PAFAH1B1	GC17P002593	Platelet Activating Factor Acetylhydrolase 1b Regulatory Subunit 1
CCKAR	GC04M026483	Cholecystokinin A Receptor
NR5A2	GC01P199996	Nuclear Receptor Subfamily 5 Group A Member 2
SHC1	GC01M154962	SHC Adaptor Protein 1
ERCC6	GC10M049454	ERCC Excision Repair 6, Chromatin Remodeling Factor
ALDOB	GC09M101420	Aldolase, Fructose-Bisphosphate B
ALAS2	GC0XM055009	5'-Aminolevulinate Synthase 2
ACHE	GC07M100889	Acetylcholinesterase (Cartwright Blood Group)
LAMA1	GC18M006941	Laminin Subunit Alpha 1
PDP1	GC08P093857	Pyruvate Dehyrogenase Phosphatase Catalytic Subunit 1
KCNJ3	GC02P154698	Potassium Inwardly Rectifying Channel Subfamily J Member 3
EYA1	GC08M071210	EYA Transcriptional Coactivator And Phosphatase 1
UROD	GC01P045012	Uroporphyrinogen Decarboxylase
POLD1	GC19P050385	DNA Polymerase Delta 1, Catalytic Subunit
ADCY10	GC01M167809	Adenylate Cyclase 10
NEK9	GC14M075079	NIMA Related Kinase 9
TBX21	GC17P047733	T-Box Transcription Factor 21
STUB1	GC16P001405	STIP1 Homology And U-Box Containing Protein 1
PLA2G2A	GC01M019975	Phospholipase A2 Group IIA
IL10RA	GC11P117987	Interleukin 10 Receptor Subunit Alpha
STAT4	GC02M191029	Signal Transducer And Activator Of Transcription 4
HELLS	GC10P094501	Helicase, Lymphoid Specific
CDK1	GC10P060772	Cyclin Dependent Kinase 1
TNFSF13B	GC13P108251	TNF Superfamily Member 13b
GP1BA	GC17P004932	Glycoprotein Ib Platelet Subunit Alpha
ITGA2	GC05P052989	Integrin Subunit Alpha 2
AGL	GC01P099850	Amylo-Alpha-1, 6-Glucosidase, 4-Alpha-Glucanotransferase
CSF2RA	GC0XP001270	Colony Stimulating Factor 2 Receptor Subunit Alpha
FECH	GC18M057544	Ferrochelatase
ADORA2A	GC22P024417	Adenosine A2a Receptor
STT3A	GC11P125592	STT3 Oligosaccharyltransferase Complex Catalytic Subunit A
WNT11	GC11M076186	Wnt Family Member 11
PRF1	GC10M070597	Perforin 1
NCAM1	GC11P112961	Neural Cell Adhesion Molecule 1
SIK2	GC11P111605	Salt Inducible Kinase 2
SCO2	GC22M050523	Synthesis Of Cytochrome C Oxidase 2
TRPM6	GC09M074725	Transient Receptor Potential Cation Channel Subfamily M Member 6
LARS2	GC03P045405	Leucyl-TRNA Synthetase 2, Mitochondrial
BCL2L11	GC02P111119	BCL2 Like 11
AMPD1	GC01M114673	Adenosine Monophosphate Deaminase 1
FGB	GC04P154564	Fibrinogen Beta Chain
IFNAR1	GC21P033324	Interferon Alpha And Beta Receptor Subunit 1
SERPINH1	GC11P075562	Serpin Family H Member 1
NCOA3	GC20P047501	Nuclear Receptor Coactivator 3
GPC3	GC0XM133535	Glypican 3
FCGR2A	GC01P161505	Fc Fragment Of IgG Receptor IIa
DCX	GC0XM111293	Doublecortin
CHD7	GC08P060678	Chromodomain Helicase DNA Binding Protein 7
RAG1	GC11P036514	Recombination Activating 1
ASL	GC07P066075	Argininosuccinate Lyase
SLC26A3	GC07M107765	Solute Carrier Family 26 Member 3
COL5A1	GC09P134641	Collagen Type V Alpha 1 Chain
CTSA	GC20P045890	Cathepsin A
CSTB	GC21M043772	Cystatin B
SMARCB1	GC22P023786	SWI/SNF Related, Matrix Associated, Actin Dependent Regulator Of Chromatin, Subfamily B, Member 1
TGM1	GC14M024249	Transglutaminase 1
XPO1	GC02M061445	Exportin 1
TCF3	GC19M001609	Transcription Factor 3
NPY1R	GC04M163323	Neuropeptide Y Receptor Y1
BID	GC22M017734	BH3 Interacting Domain Death Agonist
NOTCH4	GC06M032648	Notch Receptor 4
AGA	GC04M177430	Aspartylglucosaminidase
NEDD4	GC15M055826	NEDD4 E3 Ubiquitin Protein Ligase
CD27	GC12P008144	CD27 Molecule
TRPV5	GC07M142908	Transient Receptor Potential Cation Channel Subfamily V Member 5
DPAGT1	GC11M119096	Dolichyl-Phosphate N-Acetylglucosaminephosphotransferase 1
SLC7A9	GC19M032830	Solute Carrier Family 7 Member 9
USP14	GC18P000158	Ubiquitin Specific Peptidase 14
PML	GC15P073994	PML Nuclear Body Scaffold
GALNT2	GC01P230057	Polypeptide N-Acetylgalactosaminyltransferase 2
PTPRO	GC12P015366	Protein Tyrosine Phosphatase Receptor Type O
PXN	GC12M120210	Paxillin
ITGAL	GC16P030472	Integrin Subunit Alpha L
MECP2	GC0XM154021	Methyl-CpG Binding Protein 2
ANGPTL3	GC01P062597	Angiopoietin Like 3
GFER	GC16P001984	Growth Factor, Augmenter Of Liver Regeneration
ETFB	GC19M051345	Electron Transfer Flavoprotein Subunit Beta
HSP90B1	GC12P103930	Heat Shock Protein 90 Beta Family Member 1
HRH1	GC03P011113	Histamine Receptor H1
TACR1	GC02M075010	Tachykinin Receptor 1
NDST1	GC05P150484	N-Deacetylase And N-Sulfotransferase 1
EHMT2	GC06M031879	Euchromatic Histone Lysine Methyltransferase 2
TMPO	GC12P098515	Thymopoietin
PNKP	GC19M049861	Polynucleotide Kinase 3'-Phosphatase
PARK7	GC01P007983	Parkinsonism Associated Deglycase
ERCC1	GC19M045409	ERCC Excision Repair 1, Endonuclease Non-Catalytic Subunit
FCER2	GC19M007689	Fc Fragment Of IgE Receptor II
CCR7	GC17M040556	C-C Motif Chemokine Receptor 7
CRHR1	GC17P045784	Corticotropin Releasing Hormone Receptor 1
PEPD	GC19M033386	Peptidase D
RAP1B	GC12P068610	RAP1B, Member Of RAS Oncogene Family
TRPA1	GC08M072019	Transient Receptor Potential Cation Channel Subfamily A Member 1
A2M	GC12M009067	Alpha-2-Macroglobulin
NPR1	GC01P153697	Natriuretic Peptide Receptor 1
ESRRG	GC01M216503	Estrogen Related Receptor Gamma
F2RL3	GC19P016888	F2R Like Thrombin Or Trypsin Receptor 3
FLNB	GC03P058008	Filamin B
RELB	GC19P045002	RELB Proto-Oncogene, NF-KB Subunit
IRF8	GC16P085898	Interferon Regulatory Factor 8
CTSC	GC11M088211	Cathepsin C
CD22	GC19P035319	CD22 Molecule
HSD17B10	GC0XM053431	Hydroxysteroid 17-Beta Dehydrogenase 10
CHRNA1	GC02M174747	Cholinergic Receptor Nicotinic Alpha 1 Subunit
PRCP	GC11M082758	Prolylcarboxypeptidase
BIRC2	GC11P102347	Baculoviral IAP Repeat Containing 2
BCL6	GC03M187721	BCL6 Transcription Repressor
PLOD2	GC03M146069	Procollagen-Lysine,2-Oxoglutarate 5-Dioxygenase 2
C1QA	GC01P022636	Complement C1q A Chain
TUBA8	GC22P018110	Tubulin Alpha 8
TXK	GC04M048066	TXK Tyrosine Kinase
TEC	GC04M048137	Tec Protein Tyrosine Kinase
INPP5D	GC02P233059	Inositol Polyphosphate-5-Phosphatase D
TXN2	GC22M036467	Thioredoxin 2
SIAH1	GC16M048357	Siah E3 Ubiquitin Protein Ligase 1
SLC5A5	GC19P023315	Solute Carrier Family 5 Member 5
CLCN2	GC03M184346	Chloride Voltage-Gated Channel 2
HNRNPA2B1	GC07M026174	Heterogeneous Nuclear Ribonucleoprotein A2/B1
ZYX	GC07P143381	Zyxin
ATF2	GC02M175072	Activating Transcription Factor 2
ABL2	GC01M179108	ABL Proto-Oncogene 2, Non-Receptor Tyrosine Kinase
SKI	GC01P002228	SKI Proto-Oncogene
AICDA	GC12M008602	Activation Induced Cytidine Deaminase
GATM	GC15M045361	Glycine Amidinotransferase
TBX3	GC12M114670	T-Box Transcription Factor 3
SLC6A8	GC0XP153688	Solute Carrier Family 6 Member 8
PPM1A	GC14P060245	Protein Phosphatase, Mg2+/Mn2+ Dependent 1A
AMPD3	GC11P010309	Adenosine Monophosphate Deaminase 3
DAO	GC12P108859	D-Amino Acid Oxidase
NEUROD1	GC02M181673	Neuronal Differentiation 1
HLA-DQB1	GC06M032804	Major Histocompatibility Complex, Class II, DQ Beta 1
AIRE	GC21P044285	Autoimmune Regulator
G6PC	GC17P042900	Glucose-6-Phosphatase Catalytic Subunit
APOA2	GC01M161222	Apolipoprotein A2
FOXC2	GC16P086567	Forkhead Box C2
CLCNKB	GC01P016043	Chloride Voltage-Gated Channel Kb
PTPRN	GC02M219289	Protein Tyrosine Phosphatase Receptor Type N
SELE	GC01M169722	Selectin E
ACP1	GC02P000254	Acid Phosphatase 1
CRYAA	GC21P043169	Crystallin Alpha A
APOC2	GC19P044945	Apolipoprotein C2
SNRPN	GC15P024823	Small Nuclear Ribonucleoprotein Polypeptide N
ELN	GC07P074027	Elastin
PRL	GC06M022230	Prolactin
CPE	GC04P165361	Carboxypeptidase E
TAP2	GC06M032821	Transporter 2, ATP Binding Cassette Subfamily B Member
PRTN3	GC19P000840	Proteinase 3
PTPRN2	GC07M157539	Protein Tyrosine Phosphatase Receptor Type N2
DLK1	GC14P104663	Delta Like Non-Canonical Notch Ligand 1
PTPN3	GC09M109375	Protein Tyrosine Phosphatase Non-Receptor Type 3
COL4A2	GC13P110305	Collagen Type IV Alpha 2 Chain
TLR6	GC04M038828	Toll Like Receptor 6
RFC2	GC07M074231	Replication Factor C Subunit 2
GAL	GC11P068684	Galanin And GMAP Prepropeptide
CRH	GC08M066176	Corticotropin Releasing Hormone
ADAR	GC01M154582	Adenosine Deaminase RNA Specific
INVS	GC09P100099	Inversin
MTTP	GC04P099563	Microsomal Triglyceride Transfer Protein
SERPINF2	GC17P001742	Serpin Family F Member 2
FOXM1	GC12M002857	Forkhead Box M1
CS	GC12M056271	Citrate Synthase
ACSL4	GC0XM109624	Acyl-CoA Synthetase Long Chain Family Member 4
KCNJ10	GC01M159998	Potassium Inwardly Rectifying Channel Subfamily J Member 10
CD274	GC09P005450	CD274 Molecule
ARL3	GC10M102673	ADP Ribosylation Factor Like GTPase 3
CTNS	GC17P003636	Cystinosin, Lysosomal Cystine Transporter
ITGAX	GC16P031570	Integrin Subunit Alpha X
HAMP	GC19P038216	Hepcidin Antimicrobial Peptide
TOR1A	GC09M129812	Torsin Family 1 Member A
NEU1	GC06M031857	Neuraminidase 1
NDUFV2	GC18P009092	NADH:Ubiquinone Oxidoreductase Core Subunit V2
CARTPT	GC05P071719	CART Prepropeptide
EIF2S1	GC14P067359	Eukaryotic Translation Initiation Factor 2 Subunit Alpha
NDUFA1	GC0XP119871	NADH:Ubiquinone Oxidoreductase Subunit A1
HDC	GC15M050241	Histidine Decarboxylase
TFR2	GC07M100620	Transferrin Receptor 2
RHAG	GC06M049605	Rh Associated Glycoprotein
EIF2AK4	GC15P039934	Eukaryotic Translation Initiation Factor 2 Alpha Kinase 4
EFEMP1	GC02M055865	EGF Containing Fibulin Extracellular Matrix Protein 1
OCRL	GC0XP129539	OCRL Inositol Polyphosphate-5-Phosphatase
COL7A1	GC03M048564	Collagen Type VII Alpha 1 Chain
MPZ	GC01M161304	Myelin Protein Zero
IL12B	GC05M159314	Interleukin 12B
CSF2	GC05P132073	Colony Stimulating Factor 2
FOXO3	GC06P108559	Forkhead Box O3
SLC34A1	GC05P177380	Solute Carrier Family 34 Member 1
HRH2	GC05P175659	Histamine Receptor H2
FABP3	GC01M031365	Fatty Acid Binding Protein 3
ATXN3	GC14M094059	Ataxin 3
GANAB	GC11M063430	Glucosidase II Alpha Subunit
CISH	GC03M050618	Cytokine Inducible SH2 Containing Protein
PROM1	GC04M015965	Prominin 1
FMR1	GC0XP147913	FMRP Translational Regulator 1
HLA-C	GC06M031272	Major Histocompatibility Complex, Class I, C
NGLY1	GC03M025718	N-Glycanase 1
IL12A	GC03P159988	Interleukin 12A
ACSL1	GC04M184755	Acyl-CoA Synthetase Long Chain Family Member 1
APTX	GC09M032886	Aprataxin
AGRN	GC01P001020	Agrin
SIX1	GC14M060643	SIX Homeobox 1
HCRTR2	GC06P055106	Hypocretin Receptor 2
KITLG	GC12M088492	KIT Ligand
SFTPD	GC10M079937	Surfactant Protein D
DGUOK	GC02P073926	Deoxyguanosine Kinase
COX4I1	GC16P085798	Cytochrome C Oxidase Subunit 4I1
SALL1	GC16M051135	Spalt Like Transcription Factor 1
HLA-G	GC06P047256	Major Histocompatibility Complex, Class I, G
CD2	GC01P116754	CD2 Molecule
SLC9A3R1	GC17P074749	SLC9A3 Regulator 1
SCARB2	GC04M076158	Scavenger Receptor Class B Member 2
NLRP12	GC19M053793	NLR Family Pyrin Domain Containing 12
IL3	GC05P132060	Interleukin 3
GFRA1	GC10M116056	GDNF Family Receptor Alpha 1
THY1	GC11M119417	Thy-1 Cell Surface Antigen
PDGFD	GC11M103907	Platelet Derived Growth Factor D
COL4A6	GC0XM108155	Collagen Type IV Alpha 6 Chain
YARS2	GC12M032725	Tyrosyl-TRNA Synthetase 2
MST1	GC03M049683	Macrophage Stimulating 1
PLAUR	GC19M043646	Plasminogen Activator, Urokinase Receptor
WNK4	GC17P043993	WNK Lysine Deficient Protein Kinase 4
CLCN1	GC07P143316	Chloride Voltage-Gated Channel 1
CX3CR1	GC03M039279	C-X3-C Motif Chemokine Receptor 1
TFF1	GC21M042362	Trefoil Factor 1
FDFT1	GC08P011795	Farnesyl-Diphosphate Farnesyltransferase 1
CXCR3	GC0XM071615	C-X-C Motif Chemokine Receptor 3
STK39	GC02M167954	Serine/Threonine Kinase 39
NOD1	GC07M030424	Nucleotide Binding Oligomerization Domain Containing 1
MGAT2	GC14P049620	Alpha-1,6-Mannosyl-Glycoprotein 2-Beta-N-Acetylglucosaminyltransferase
VNN1	GC06M132680	Vanin 1
PLCE1	GC10P093993	Phospholipase C Epsilon 1
ALOX5AP	GC13P030713	Arachidonate 5-Lipoxygenase Activating Protein
CD14	GC05M140631	CD14 Molecule
GJB6	GC13M020221	Gap Junction Protein Beta 6
WARS2	GC01M119031	Tryptophanyl TRNA Synthetase 2, Mitochondrial
IL23R	GC01P067138	Interleukin 23 Receptor
SLC6A6	GC03P014402	Solute Carrier Family 6 Member 6
CNTNAP2	GC07P146116	Contactin Associated Protein 2
ROBO1	GC03M078597	Roundabout Guidance Receptor 1
ALAS1	GC03P052198	5'-Aminolevulinate Synthase 1
SDC4	GC20M045325	Syndecan 4
PSMB5	GC14M023016	Proteasome 20S Subunit Beta 5
NCOA2	GC08M070109	Nuclear Receptor Coactivator 2
HMBS	GC11P119084	Hydroxymethylbilane Synthase
CHRNA3	GC15M078594	Cholinergic Receptor Nicotinic Alpha 3 Subunit
MBP	GC18M076978	Myelin Basic Protein
LOX	GC05M122063	Lysyl Oxidase
PAX7	GC01P018631	Paired Box 7
DLC1	GC08M013083	DLC1 Rho GTPase Activating Protein
ATP6V1B1	GC02P070935	ATPase H+ Transporting V1 Subunit B1
FCGR3A	GC01M161541	Fc Fragment Of IgG Receptor IIIa
GP6	GC19M055013	Glycoprotein VI Platelet
TNFSF13	GC17P007558	TNF Superfamily Member 13
HIPK2	GC07M139561	Homeodomain Interacting Protein Kinase 2
CTSG	GC14M024573	Cathepsin G
CYP2J2	GC01M059893	Cytochrome P450 Family 2 Subfamily J Member 2
SNCAIP	GC05P122311	Synuclein Alpha Interacting Protein
EFNB2	GC13M106489	Ephrin B2
DRD1	GC05M175440	Dopamine Receptor D1
NPR3	GC05P032689	Natriuretic Peptide Receptor 3
RICTOR	GC05M038939	RPTOR Independent Companion Of MTOR Complex 2
MKI67	GC10M128096	Marker Of Proliferation Ki-67
BTD	GC03P015621	Biotinidase
NCOA1	GC02P024492	Nuclear Receptor Coactivator 1
SLC2A10	GC20P046709	Solute Carrier Family 2 Member 10
AASS	GC07M122073	Aminoadipate-Semialdehyde Synthase
TRIM25	GC17M056836	Tripartite Motif Containing 25
ELK1	GC0XM047635	ETS Transcription Factor ELK1
LAMA4	GC06M112107	Laminin Subunit Alpha 4
SPI1	GC11M061125	Spi-1 Proto-Oncogene
AOX1	GC02P200585	Aldehyde Oxidase 1
ALS2	GC02M201701	Alsin Rho Guanine Nucleotide Exchange Factor ALS2
STMN1	GC01M025884	Stathmin 1
ATF3	GC01P212565	Activating Transcription Factor 3
CR2	GC01P207454	Complement C3d Receptor 2
TNFRSF9	GC01M007915	TNF Receptor Superfamily Member 9
ATP6V0A2	GC12P123712	ATPase H+ Transporting V0 Subunit A2
CARD9	GC09M136361	Caspase Recruitment Domain Family Member 9
MAD2L2	GC01M011674	Mitotic Arrest Deficient 2 Like 2
CASP5	GC11M104995	Caspase 5
DYNC1H1	GC14P104635	Dynein Cytoplasmic 1 Heavy Chain 1
ANXA11	GC10M080150	Annexin A11
SLC7A5	GC16M087830	Solute Carrier Family 7 Member 5
FOSL1	GC11M065909	FOS Like 1, AP-1 Transcription Factor Subunit
MTM1	GC0XP150562	Myotubularin 1
SLC5A6	GC02M027201	Solute Carrier Family 5 Member 6
ADH7	GC04M099412	Alcohol Dehydrogenase 7 (Class IV), Mu Or Sigma Polypeptide
B4GALT1	GC09M033100	Beta-1,4-Galactosyltransferase 1
CA9	GC09P035673	Carbonic Anhydrase 9
BCL2L2	GC14P025306	BCL2 Like 2
PSMB10	GC16M067937	Proteasome 20S Subunit Beta 10
S1PR1	GC01P101236	Sphingosine-1-Phosphate Receptor 1
DPM1	GC20M050934	Dolichyl-Phosphate Mannosyltransferase Subunit 1, Catalytic
MAP3K14	GC17M045263	Mitogen-Activated Protein Kinase Kinase Kinase 14
TNFRSF12A	GC16P003018	TNF Receptor Superfamily Member 12A
KCNE1	GC21M034446	Potassium Voltage-Gated Channel Subfamily E Regulatory Subunit 1
CRYM	GC16M021238	Crystallin Mu
HIF1AN	GC10P100529	Hypoxia Inducible Factor 1 Subunit Alpha Inhibitor
SLC6A19	GC05P001201	Solute Carrier Family 6 Member 19
TAT	GC16M071565	Tyrosine Aminotransferase
MMP16	GC08M088032	Matrix Metallopeptidase 16
EGLN2	GC19P040799	Egl-9 Family Hypoxia Inducible Factor 2
CACNA1I	GC22P039570	Calcium Voltage-Gated Channel Subunit Alpha1 I
ATP6V0A4	GC07M138707	ATPase H+ Transporting V0 Subunit A4
TNFRSF17	GC16P011965	TNF Receptor Superfamily Member 17
GBE1	GC03M081489	1,4-Alpha-Glucan Branching Enzyme 1
VAMP1	GC12M006462	Vesicle Associated Membrane Protein 1
PARVA	GC11P012398	Parvin Alpha
PAX4	GC07M127610	Paired Box 4
BMP6	GC06P007726	Bone Morphogenetic Protein 6
MAFB	GC20M040685	MAF BZIP Transcription Factor B
NPHP1	GC02M110122	Nephrocystin 1
PLAGL1	GC06M143940	PLAG1 Like Zinc Finger 1
HLA-DPB1	GC06P047346	Major Histocompatibility Complex, Class II, DP Beta 1
NAGLU	GC17P042535	N-Acetyl-Alpha-Glucosaminidase
AGRP	GC16M067482	Agouti Related Neuropeptide
COL4A4	GC02M226967	Collagen Type IV Alpha 4 Chain
IGFBP2	GC02P216632	Insulin Like Growth Factor Binding Protein 2
SERPINA3	GC14P094612	Serpin Family A Member 3
PGF	GC14M074941	Placental Growth Factor
SAMHD1	GC20M036890	SAM And HD Domain Containing Deoxynucleoside Triphosphate Triphosphohydrolase 1
CD86	GC03P122055	CD86 Molecule
CCL11	GC17P034285	C-C Motif Chemokine Ligand 11
TNFRSF25	GC01M006460	TNF Receptor Superfamily Member 25
FXYD2	GC11M117800	FXYD Domain Containing Ion Transport Regulator 2
SURF1	GC09M133351	SURF1 Cytochrome C Oxidase Assembly Factor
TFAM	GC10P058385	Transcription Factor A, Mitochondrial
RNASEH2A	GC19P012809	Ribonuclease H2 Subunit A
NSD1	GC05P177134	Nuclear Receptor Binding SET Domain Protein 1
NTF3	GC12P005432	Neurotrophin 3
SOX17	GC08P054457	SRY-Box Transcription Factor 17
SPG7	GC16P089492	SPG7 Matrix AAA Peptidase Subunit, Paraplegin
HNF4G	GC08P075407	Hepatocyte Nuclear Factor 4 Gamma
BAMBI	GC10P028685	BMP And Activin Membrane Bound Inhibitor
ZMPSTE24	GC01P040258	Zinc Metallopeptidase STE24
DDX41	GC05M177511	DEAD-Box Helicase 41
CSF1	GC01P109911	Colony Stimulating Factor 1
PPOX	GC01P161167	Protoporphyrinogen Oxidase
CPOX	GC03M098576	Coproporphyrinogen Oxidase
UBA5	GC03P132654	Ubiquitin Like Modifier Activating Enzyme 5
DHDDS	GC01P026432	Dehydrodolichyl Diphosphate Synthase Subunit
PSMA5	GC01M109399	Proteasome 20S Subunit Alpha 5
NUP107	GC12P068686	Nucleoporin 107
CALCA	GC11M014945	Calcitonin Related Polypeptide Alpha
CGA	GC06M087085	Glycoprotein Hormones, Alpha Polypeptide
BCS1L	GC02P218658	BCS1 Homolog, Ubiquinol-Cytochrome C Reductase Complex Chaperone
SLC26A4	GC07P107660	Solute Carrier Family 26 Member 4
GRB10	GC07M050590	Growth Factor Receptor Bound Protein 10
EXO1	GC01P241847	Exonuclease 1
ABCG1	GC21P042199	ATP Binding Cassette Subfamily G Member 1
USF1	GC01M161039	Upstream Transcription Factor 1
NLRP7	GC19M054923	NLR Family Pyrin Domain Containing 7
TAC1	GC07P097731	Tachykinin Precursor 1
NAGA	GC22M042058	Alpha-N-Acetylgalactosaminidase
HTRA1	GC10P122461	HtrA Serine Peptidase 1
FOXP2	GC07P114086	Forkhead Box P2
CD34	GC01M207880	CD34 Molecule
CXCL1	GC04P073869	C-X-C Motif Chemokine Ligand 1
NRIP1	GC21M014961	Nuclear Receptor Interacting Protein 1
DOCK8	GC09P000214	Dedicator Of Cytokinesis 8
SLC39A8	GC04M102252	Solute Carrier Family 39 Member 8
HTT	GC04P003041	Huntingtin
SRD5A3	GC04P055346	Steroid 5 Alpha-Reductase 3
BCAR1	GC16M075228	BCAR1 Scaffold Protein, Cas Family Member
TNXB	GC06M032635	Tenascin XB
LAMA2	GC06P128863	Laminin Subunit Alpha 2
CFP	GC0XM047624	Complement Factor Properdin
DNASE1L3	GC03M058192	Deoxyribonuclease 1 Like 3
PMPCA	GC09P136410	Peptidase, Mitochondrial Processing Subunit Alpha
PDYN	GC20M001978	Prodynorphin
COX10	GC17P014069	Cytochrome C Oxidase Assembly Factor Heme A:Farnesyltransferase COX10
SH2B1	GC16P029024	SH2B Adaptor Protein 1
NEK1	GC04M169393	NIMA Related Kinase 1
HAX1	GC01P154273	HCLS1 Associated Protein X-1
TNKS	GC08P009555	Tankyrase
LAP3	GC04P017578	Leucine Aminopeptidase 3
AKR1B10	GC07P134527	Aldo-Keto Reductase Family 1 Member B10
TNKS2	GC10P091798	Tankyrase 2
PGM3	GC06M083161	Phosphoglucomutase 3
ACAD9	GC03P130611	Acyl-CoA Dehydrogenase Family Member 9
MTMR2	GC11M095832	Myotubularin Related Protein 2
SEC63	GC06M107867	SEC63 Homolog, Protein Translocation Regulator
OSM	GC22M030262	Oncostatin M
AUH	GC09M091213	AU RNA Binding Methylglutaconyl-CoA Hydratase
VAMP2	GC17M008854	Vesicle Associated Membrane Protein 2
CMA1	GC14M024506	Chymase 1
NDUFB8	GC10M100523	NADH:Ubiquinone Oxidoreductase Subunit B8
HBEGF	GC05M140332	Heparin Binding EGF Like Growth Factor
MGAT1	GC05M180841	Alpha-1,3-Mannosyl-Glycoprotein 2-Beta-N-Acetylglucosaminyltransferase
PRSS8	GC16M031132	Serine Protease 8
EMX2	GC10P117542	Empty Spiracles Homeobox 2
CD226	GC18M069831	CD226 Molecule
SORT1	GC01M109310	Sortilin 1
ASIC1	GC12P050057	Acid Sensing Ion Channel Subunit 1
TRHR	GC08P109084	Thyrotropin Releasing Hormone Receptor
IL21	GC04M122612	Interleukin 21
LAMP1	GC13P113297	Lysosomal Associated Membrane Protein 1
PSMD14	GC02P161308	Proteasome 26S Subunit, Non-ATPase 14
COX6B1	GC19P038224	Cytochrome C Oxidase Subunit 6B1
TTBK2	GC15M042738	Tau Tubulin Kinase 2
SLC25A24	GC01M108134	Solute Carrier Family 25 Member 24
TRAP1	GC16M003652	TNF Receptor Associated Protein 1
SLC27A5	GC19M058479	Solute Carrier Family 27 Member 5
M6PR	GC12M008955	Mannose-6-Phosphate Receptor, Cation Dependent
FBL	GC19M039834	Fibrillarin
SLC1A7	GC01M053087	Solute Carrier Family 1 Member 7
TJP1	GC15M029699	Tight Junction Protein 1
RELN	GC07M103471	Reelin
SLC7A6	GC16P068263	Solute Carrier Family 7 Member 6
CTTN	GC11P070398	Cortactin
LIF	GC22M030240	LIF Interleukin 6 Family Cytokine
FSHB	GC11P030210	Follicle Stimulating Hormone Subunit Beta
EPM2A	GC06M145382	EPM2A Glucan Phosphatase, Laforin
COX5A	GC15M074919	Cytochrome C Oxidase Subunit 5A
SULT1A1	GC16M028606	Sulfotransferase Family 1A Member 1
P2RX4	GC12P122831	Purinergic Receptor P2X 4
LTF	GC03M046435	Lactotransferrin
ALG1	GC16P005033	ALG1 Chitobiosyldiphosphodolichol Beta-Mannosyltransferase
MSRB3	GC12P065279	Methionine Sulfoxide Reductase B3
[truncated: 1,388 more rows]
