# Supplementary material for: Investigating the Molecular Mechanism of Quercetin Protecting against Podocyte Injury to Attenuate Diabetic Nephropathy through Network Pharmacology, MicroarrayData Analysis, and Molecular Docking
Source: Evid Based Complement Alternat Med. 2022 May 16;2022:7291434. doi: 10.1155/2022/7291434 (PMC9126727; doi:10.1155/2022/7291434)
Supplement: Supplementary Materials — Supplementary Table 1: 355 targets of QUE. Supplementary Table 2: 4895 human genes related to DN. Supplementary Table 3: 848 human genes associated with podocyte injury. Supplementary Table 4: 42 mapping targets. Supplementary Table 5: specific analytical parameters of 41 candidate targets. Supplementary Table 6: 118 signaling pathways from R project. Supplementary Table 7: 52 biological functions from R project. [file 7291434.f1.zip › 7291434.f1/Supplementary Table 3-Genes of podocyte injury.txt]

Gene	Uniprot ID	Description	Source
MXRA8	Q9BRK3	Matrix remodeling-associated protein 8	OMIM
ZAP70	P43403	Tyrosine-protein kinase ZAP-70	OMIM
XDH	P47989	Xanthine dehydrogenase/oxidase [Includes: Xanthine dehydrogenase	OMIM
WNT5A	P41221	Protein Wnt-5a	OMIM
VSNL1	P62760	Visinin-like protein 1	OMIM
VHL	P40337	von Hippel-Lindau disease tumor suppressor	OMIM
UGT1A1	P22309	UDP-glucuronosyltransferase 1-1	OMIM
TXNIP	Q9H3M7	Thioredoxin-interacting protein	OMIM
TTC7A	Q9ULT0	Tetratricopeptide repeat protein 7A	OMIM
TRPM8	Q7Z2W7	Transient receptor potential cation channel subfamily M member 8	OMIM
TREX1	Q9NSU2	Three-prime repair exonuclease 1	OMIM
TRAK1	Q9UPV9	Trafficking kinesin-binding protein 1	OMIM
TPRKB	Q9Y3C4	EKC/KEOPS complex subunit TPRKB	OMIM
TNNI3K	Q59H18	Serine/threonine-protein kinase TNNI3K	OMIM
TNFSF6	Q53ZZ1	FAS ligand	OMIM
TNFRSF1B	P20333	Tumor necrosis factor receptor superfamily member 1B	OMIM
TMEM33	P57088	Transmembrane protein 33	OMIM
TLR9	Q9NR96	Toll-like receptor 9	OMIM
TLR1	Q15399	Toll-like receptor 1	OMIM
TFPI	P10646	Tissue factor pathway inhibitor	OMIM
TACR1	P25103	Substance-P receptor	OMIM
STAT1	P42224	Signal transducer and activator of transcription 1-alpha/beta	OMIM
ST6GAL1	P15907	Beta-galactoside alpha-2	OMIM
SPEG	Q15772	Striated muscle preferentially expressed protein kinase	OMIM
SORT1	Q99523	Sortilin	OMIM
SMPDL3B	Q92485	Acid sphingomyelinase-like phosphodiesterase 3b	OMIM
SLIT2	O94813	Slit homolog 2 protein	OMIM
SLC4A3	P48751	Anion exchange protein 3	OMIM
SLC30A10	Q6XR72	Zinc transporter 10	OMIM
SLC2A9	Q9NRM0	Solute carrier family 2	OMIM
SLC16A1	P53985	Monocarboxylate transporter 1	OMIM
SKI	P12755	Ski oncogene	OMIM
SFTPB	D6W5L6	Pulmonary surfactant-associated protein B	OMIM
SERPINE2	P07093	Glia-derived nexin	OMIM
SEMA4C	Q9C0C4	Semaphorin-4C	OMIM
SELP	P16109	P-selectin	OMIM
SELENON	Q9NZV5	Selenoprotein N	OMIM
SDC1	P18827	Syndecan-1	OMIM
SCN9A	Q15858	Sodium channel protein type 9 subunit alpha	OMIM
SCN11A	Q9UI33	Sodium channel protein type 11 subunit alpha	OMIM
SCN10A	Q9Y5Y9	Sodium channel protein type 10 subunit alpha	OMIM
RTN4	Q9NQC3	Reticulon-4	OMIM
RSPO1	Q2MKA7	R-spondin-1	OMIM
ROBO1	Q9Y6N7	Roundabout homolog 1	OMIM
RGS5	O15539	Regulator of G-protein signaling 5	OMIM
RETNLB	Q9BQ08	Resistin-like beta	OMIM
REN	P00797	Renin	OMIM
REG4	Q9BYZ8	Regenerating islet-derived protein 4	OMIM
RAB7A	P51149	Ras-related protein Rab-7a	OMIM
PTPN22	Q9Y2R2	Tyrosine-protein phosphatase non-receptor type 22	OMIM
PTGS2	P35354	Prostaglandin G/H synthase 2	OMIM
PROX1	Q92786	Prospero homeobox protein 1	OMIM
PROS1	P07225	Vitamin K-dependent protein S	OMIM
PROC	P04070	Vitamin K-dependent protein C	OMIM
PRKCZ	Q05513	Protein kinase C zeta type	OMIM
PRKCE	L7RTI5	Protein kinase C epsilon type	OMIM
PRG4	Q92954	Proteoglycan 4	OMIM
PPARGC1A	Q9UBK2	Peroxisome proliferator-activated receptor gamma coactivator 1-alpha	OMIM
PODN	Q7Z5L7	Podocan	OMIM
PLSCR1	O15162	Phospholipid scramblase 1	OMIM
PLA2R1	Q13018	Secretory phospholipase A2 receptor	OMIM
PLA2G4A	P47712	Cytosolic phospholipase A2	OMIM
PKLR	P30613	Pyruvate kinase PKLR	OMIM
PIK3CA	P42336	Phosphatidylinositol 4	OMIM
PDE1A	P54750	Calcium/calmodulin-dependent 3'	OMIM
PDCD1	Q15116	Programmed cell death protein 1	OMIM
PACC1	Q9H813	Proton-activated chloride channel	OMIM
P2RY14	Q15391	P2Y purinoceptor 14	OMIM
NUP133	Q8WUM0	Nuclear pore complex protein Nup133	OMIM
NTRK1	P04629	High affinity nerve growth factor receptor	OMIM
NPHS2	Q9NP85	Podocin	OMIM
NOTCH2	Q04721	Neurogenic locus notch homolog protein 2	OMIM
NMNAT1	Q9HAN9	Nicotinamide/nicotinic acid mononucleotide adenylyltransferase 1	OMIM
NLRP3	Q96P20	NACHT	OMIM
NGF	P01138	Beta-nerve growth factor	OMIM
MUTYH	D3DPZ6	Adenine DNA glycosylase	OMIM
MUC7	Q8TAX7	Mucin-7	OMIM
MUC20	Q8N307	Mucin-20	OMIM
MTOR	P42345	Serine/threonine-protein kinase mTOR	OMIM
MPV17	P39210	Protein Mpv17	OMIM
MITF	O75030	Microphthalmia-associated transcription factor	OMIM
MERTK	Q12866	Tyrosine-protein kinase Mer	OMIM
MAPKAPK2	P49137	MAP kinase-activated protein kinase 2	OMIM
MANF	A8K878	Mesencephalic astrocyte-derived neurotrophic factor	OMIM
LYST	Q99698	Lysosomal-trafficking regulator	OMIM
LRRFIP1	Q32MZ4	Leucine-rich repeat flightless-interacting protein 1	OMIM
LGALSL	Q3ZCW2	Galectin-related protein	OMIM
LAMB2	P55268	Laminin subunit beta-2	OMIM
KIRREL1	B4DN67	Kin of IRRE-like protein 1	OMIM
KIAA0971	A0A024R419	KIAA0971	OMIM
KDR	P35968	Vascular endothelial growth factor receptor 2	OMIM
KCNT2	Q6UVM3	Potassium channel subfamily T member 2	OMIM
KANK4	Q5T7N3	KN motif and ankyrin repeat domain-containing protein 4	OMIM
ITGB6	P18564	Integrin beta-6	OMIM
ITGAV	P06756	Integrin alpha-V	OMIM
INPP5D	Q92835	Phosphatidylinositol 3	OMIM
INAVA	Q3KP66	Innate immunity activator protein	OMIM
IL8RB	Q53PC4	Interleukin 8 receptor	OMIM
IL37	Q9NZH6	Interleukin-37	OMIM
IL1R1	P14778	Interleukin-1 receptor type 1	OMIM
IL1A	P01583	Interleukin-1 alpha	OMIM
IL10	P22301	Interleukin-10	OMIM
IGFBP5	P24593	Insulin-like growth factor-binding protein 5	OMIM
IDH1	O75874	Isocitrate dehydrogenase [NADP] cytoplasmic	OMIM
HTT	P42858	Huntingtin	OMIM
HSD11B1	P28845	Corticosteroid 11-beta-dehydrogenase isozyme 1	OMIM
HOPX	Q9BPY8	Homeodomain-only protein	OMIM
HNMT	P50135	Histamine N-methyltransferase	OMIM
HMCN1	Q96RW7	Hemicentin-1	OMIM
GSK3B	P49841	Glycogen synthase kinase-3 beta	OMIM
GPR78	Q96P69	G-protein coupled receptor 78	OMIM
Gene	Entry	Protein names	OMIM
GCG	P01275	Glucagon [Cleaved into: Glicentin; Glicentin-related polypeptide	OMIM
GAD1	Q8IVA8	Glutamate decarboxylase 1	OMIM
FSTL1	Q12841	Follistatin-related protein 1	OMIM
FRAS1	Q86XX4	Extracellular matrix protein FRAS1	OMIM
FN1	P02751	Fibronectin	OMIM
FLNB	O75369	Filamin-B	OMIM
FLJ10035	Q53SV2	Uncharacterized protein FLJ10035	OMIM
FCGR2B	P31994	Low affinity immunoglobulin gamma Fc region receptor II-b	OMIM
FCGR2A	P12318	Low affinity immunoglobulin gamma Fc region receptor II-a	OMIM
FASTKD2	Q9NYY8	FAST kinase domain-containing protein 2	OMIM
FASLG	P48023	Tumor necrosis factor ligand superfamily member 6	OMIM
FAM36A	B3KM21	Family with sequence similarity 36	OMIM
F5	P12259	Coagulation factor V	OMIM
F3	P13726	Tissue factor	OMIM
EPHX1	P07099	Epoxide hydrolase 1	OMIM
EPHB3	P54753	Ephrin type-B receptor 3	OMIM
EPHB2	P29323	Ephrin type-B receptor 2	OMIM
EIF2B5	Q13144	Translation initiation factor eIF-2B subunit epsilon	OMIM
EIF2B4	Q9UI10	Translation initiation factor eIF-2B subunit delta	OMIM
EIF2B3	Q9NR50	Translation initiation factor eIF-2B subunit gamma	OMIM
EDN2	P20800	Endothelin-2	OMIM
ECE2	P0DPD6	Endothelin-converting enzyme 2	OMIM
ECE1	P42892	Endothelin-converting enzyme 1	OMIM
DYSF	O75923	Dysferlin	OMIM
DSTYK	Q6XUX3	Dual serine/threonine and tyrosine protein kinase	OMIM
DPPA2	Q7Z7J5	Developmental pluripotency-associated protein 2	OMIM
DCTN1	Q14203	Dynactin subunit 1	OMIM
DCBLD2	Q96PD2	Discoidin	OMIM
DAG1	Q14118	Dystroglycan	OMIM
CXCR4	P61073	C-X-C chemokine receptor type 4	OMIM
CXCR2	P25025	C-X-C chemokine receptor type 2	OMIM
CXCL1	P09341	Growth-regulated alpha protein	OMIM
CTLA4	P16410	Cytotoxic T-lymphocyte protein 4	OMIM
CTH	P32929	Cystathionine gamma-lyase	OMIM
CRP	P02741	C-reactive protein [Cleaved into: C-reactive protein	OMIM
CREG1	O75629	Protein CREG1	OMIM
COX20	Q5RI15	Cytochrome c oxidase assembly protein COX20	OMIM
COL4A4	P53420	Collagen alpha-4	OMIM
COL4A3	Q01955	Collagen alpha-3	OMIM
COL3A1	P02461	Collagen alpha-1	OMIM
CHRNG	P07510	Acetylcholine receptor subunit gamma	OMIM
CHRNA9	Q9UGM1	Neuronal acetylcholine receptor subunit alpha-9	OMIM
CHMP2B	Q9UQN3	Charged multivesicular body protein 2b	OMIM
CHI3L1	P36222	Chitinase-3-like protein 1	OMIM
CFHR3	Q02985	Complement factor H-related protein 3	OMIM
CFHR1	Q03591	Complement factor H-related protein 1	OMIM
CFH	P08603	Complement factor H	OMIM
CDCP1	Q9H5V8	CUB domain-containing protein 1	OMIM
CD80	P33681	T-lymphocyte activation antigen CD80	OMIM
CD55	P08174	Complement decay-accelerating factor	OMIM
CCR3	P51677	C-C chemokine receptor type 3	OMIM
CCR1	P32246	C-C chemokine receptor type 1	OMIM
CBLB	Q13191	E3 ubiquitin-protein ligase CBL-B	OMIM
CASP10	Q92851	Caspase-10	OMIM
CALM3	P0DP25	Calmodulin-3	OMIM
CALM2	P0DP24	Calmodulin-2	OMIM
CALM1	P0DP23	Calmodulin-1	OMIM
C1QC	P02747	Complement C1q subcomponent subunit C	OMIM
C1QB	P02746	Complement C1q subcomponent subunit B	OMIM
C1QA	P02745	Complement C1q subcomponent subunit A	OMIM
BHLHE40	O14503	Class E basic helix-loop-helix protein 40	OMIM
BHLHB2	Q6IB83	BHLHB2 protein	OMIM
ATP2C1	P98194	Calcium-transporting ATPase type 2C member 1	OMIM
ATP1B1	P05026	Sodium/potassium-transporting ATPase subunit beta-1	OMIM
ATG16L1	Q676U5	Autophagy-related protein 16-1	OMIM
ARTN	Q5T4W7	Artemin	OMIM
ANKRD23	Q86SG2	Ankyrin repeat domain-containing protein 23	OMIM
AKR1A1	P14550	Aldo-keto reductase family 1 member A1	OMIM
AIM2	O14862	Interferon-inducible protein AIM2	OMIM
AGTR1	P30556	Type-1 angiotensin II receptor	OMIM
AGT	B0ZBE2	Angiotensinogen	OMIM
ADORA1	P30542	Adenosine receptor A1	OMIM
ADIPOQ	A8K660	Adiponectin	OMIM
ADD1	P35611	Alpha-adducin	OMIM
ACVR1	Q04771	Activin receptor type-1	OMIM
ACTN2	P35609	Alpha-actinin-2	OMIM
ACOX2	Q99424	Peroxisomal acyl-coenzyme A oxidase 2	OMIM
ACKR3	P25106	Atypical chemokine receptor 3	OMIM
AADAC	P22760	Arylacetamide deacetylase	OMIM
ZYX	Q15942	zyxin	GeneCards
XPNPEP3	Q9NQH7	X-prolyl aminopeptidase 3	GeneCards
XPNPEP1	Q5T6H2	X-prolyl aminopeptidase 1	GeneCards
WWTR1	Q9GZV5	WW domain containing transcription regulator 1	GeneCards
WWC1	Q8IX03	WW and C2 domain containing 1	GeneCards
VPS4B	O75351	vacuolar protein sorting 4 homolog B	GeneCards
VPS26A	O75436	VPS26, retromer complex component A	GeneCards
VIM	P08670	vimentin	GeneCards
VDR	P11473	vitamin D receptor	GeneCards
VCP	P55072	valosin containing protein	GeneCards
VCL	P18206	vinculin	GeneCards
USF1	P22415	upstream transcription factor 1	GeneCards
UQCRC2	P22695	ubiquinol-cytochrome c reductase core protein 2	GeneCards
UBE2I	P63279	ubiquitin conjugating enzyme E2 I	GeneCards
UBE2H	P62256	ubiquitin conjugating enzyme E2 H	GeneCards
UACA	Q9BZF9	uveal autoantigen with coiled-coil domains and ankyrin repeats	GeneCards
TXNIP	Q9H3M7	thioredoxin interacting protein	GeneCards
TUBGCP6	Q96RT7	tubulin gamma complex associated protein 6	GeneCards
TTC21B	Q7Z4L5	tetratricopeptide repeat domain 21B	GeneCards
TST	Q16762	thiosulfate sulfurtransferase	GeneCards
TSG101	Q99816	tumor susceptibility 101	GeneCards
TPPP3	Q9BW30	tubulin polymerization promoting protein family member 3	GeneCards
TPP1	O14773	tripeptidyl peptidase 1	GeneCards
TPI1	P60174	triosephosphate isomerase 1	GeneCards
TP53RK	Q96S44	TP53 regulating kinase	GeneCards
TP53	P04637	tumor protein p53	GeneCards
TOR1A	O14656	torsin family 1 member A	GeneCards
TOMM40	O96008	translocase of outer mitochondrial membrane 40	GeneCards
TOM1L2	Q6ZVM7	target of myb1 like 2 membrane trafficking protein	GeneCards
TNIP1	Q15025	TNFAIP3 interacting protein 1	GeneCards
TNFRSF11B	O00300	TNF receptor superfamily member 11b	GeneCards
TNFAIP8	O95379	TNF alpha induced protein 8	GeneCards
TNF	P01375	tumor necrosis factor	GeneCards
TKT	P29401	transketolase	GeneCards
TJP1	Q07157	tight junction protein 1	GeneCards
THBS1	P07996	thrombospondin 1	GeneCards
TGFBR2	P37173	transforming growth factor beta receptor 2	GeneCards
TFF3	Q07654	trefoil factor 3	GeneCards
TBX2	Q13207	T-box transcription factor 2	GeneCards
TALDO1	P37837	transaldolase 1	GeneCards
TAGLN2	P37802	transgelin 2	GeneCards
STUB1	Q9UNE7	STIP1 homology and U-box containing protein 1	GeneCards
STK24	Q5JV98	serine/threonine kinase 24	GeneCards
SRSF2	Q01130	serine and arginine rich splicing factor 2	GeneCards
SRSF1	Q07955	serine and arginine rich splicing factor 1	GeneCards
SRI	P30626	sorcin	GeneCards
SQSTM1	Q13501	sequestosome 1	GeneCards
SP1	P08047	Sp1 transcription factor	GeneCards
SOD2	P04179	superoxide dismutase 2	GeneCards
SOD1	P00441	superoxide dismutase 1	GeneCards
SMPD1	P17405	sphingomyelin phosphodiesterase 1	GeneCards
SMAD7	O15105	SMAD family member 7	GeneCards
SMAD6	O43541	SMAD family member 6	GeneCards
SMAD4	Q13485	SMAD family member 4	GeneCards
SLIT2	O94813	slit guidance ligand 2	GeneCards
SLC9A3R1	O14745	SLC9A3 regulator 1	GeneCards
SLC5A2	P31639	solute carrier family 5 member 2	GeneCards
SLC4A4	Q9Y6R1	solute carrier family 4 member 4	GeneCards
SLC44A2	Q8IWA5	solute carrier family 44 member 2	GeneCards
SLC26A4	O43511	solute carrier family 26 member 4	GeneCards
SLC22A6	Q4U2R8	solute carrier family 22 member 6	GeneCards
SLC12A3	P55017	solute carrier family 12 member 3	GeneCards
SKP2	Q13309	S-phase kinase associated protein 2	GeneCards
SKP1	P63208	S-phase kinase associated protein 1	GeneCards
SFRP1	Q6ZSL4	secreted frizzled related protein 1	GeneCards
SERPINA1	P01009	serpin family A member 1	GeneCards
SEMA3C	Q99985	semaphorin 3C	GeneCards
SELE	Q5TI75	selectin E	GeneCards
SCHIP1	P0DPB3	schwannomin interacting protein 1	GeneCards
SCARB2	Q14108	scavenger receptor class B member 2	GeneCards
S100A6	P06703	S100 calcium binding protein A6	GeneCards
RYR2	Q92736	ryanodine receptor 2	GeneCards
RTN4	Q9NQC3	reticulon 4	GeneCards
RPS7	P62081	ribosomal protein S7	GeneCards
RPS6KB1	P23443	ribosomal protein S6 kinase B1	GeneCards
RPS3	P23396	ribosomal protein S3	GeneCards
RPS27A	P62979	ribosomal protein S27a	GeneCards
RPS20	P60866	ribosomal protein S20	GeneCards
RPS19	P39019	ribosomal protein S19	GeneCards
RPS15A	P62244	ribosomal protein S15a	GeneCards
RPS14	P62263	ribosomal protein S14	GeneCards
RPLP0	P05388	ribosomal protein lateral stalk subunit P0	GeneCards
RPL7A	P62424	ribosomal protein L7a	GeneCards
RPL7	P18124	ribosomal protein L7	GeneCards
RPL5	P46777	ribosomal protein L5	GeneCards
RPL23	P62829	ribosomal protein L23	GeneCards
RPL11	P62913	ribosomal protein L11	GeneCards
RPH3A	Q9Y2J0	rabphilin 3A	GeneCards
RNASET2	O00584	ribonuclease T2	GeneCards
RNASE1	P07998	ribonuclease A family member 1, pancreatic	GeneCards
RIDA	P52758	reactive intermediate imine deaminase A homolog	GeneCards
RHOF	Q9HBH0	ras homolog family member F, filopodia associated	GeneCards
RHOC	P08134	ras homolog family member C	GeneCards
RHOA	P61586	ras homolog family member A	GeneCards
RET	P07949	ret proto-oncogene	GeneCards
REN	P00797	renin	GeneCards
RB1	P06400	RB transcriptional corepressor 1	GeneCards
RACK1	P63244	receptor for activated C kinase 1	GeneCards
QPRT	Q15274	quinolinate phosphoribosyltransferase	GeneCards
PVALB	P20472	parvalbumin	GeneCards
PTPA	Q15257	protein phosphatase 2 phosphatase activator	GeneCards
PTP4A1	Q93096	protein tyrosine phosphatase 4A1	GeneCards
PTK2	Q05397	protein tyrosine kinase 2	GeneCards
PTGER2	P43116	prostaglandin E receptor 2	GeneCards
PTEN	P60484	phosphatase and tensin homolog	GeneCards
PSMC6	P62333	proteasome 26S subunit, ATPase 6	GeneCards
PSMB5	P28074	proteasome subunit beta 5	GeneCards
PSAT1	Q9Y617	phosphoserine aminotransferase 1	GeneCards
PRSS3	P35030	serine protease 3	GeneCards
PRSS1	P07477	serine protease 1	GeneCards
PRKACB	P22694	protein kinase cAMP-activated catalytic subunit beta	GeneCards
PRKAB1	Q9Y478	protein kinase AMP-activated non-catalytic subunit beta 1	GeneCards
PRDX6	P30041	peroxiredoxin 6	GeneCards
PRDX1	Q06830	peroxiredoxin 1	GeneCards
PPP1CA	P62136	protein phosphatase 1 catalytic subunit alpha	GeneCards
PPA1	Q15181	pyrophosphatase (inorganic) 1	GeneCards
POLG	P54098	DNA polymerase gamma, catalytic subunit	GeneCards
PNPO	Q9NVS9	pyridoxamine 5'-phosphate oxidase	GeneCards
PNP	P00491	purine nucleoside phosphorylase	GeneCards
PLSCR1	O15162	phospholipid scramblase 1	GeneCards
PLPP1	O14494	phospholipid phosphatase 1	GeneCards
PLEC	Q15149	plectin	GeneCards
PLAUR	Q03405	plasminogen activator, urokinase receptor	GeneCards
PIK3C2A	O00443	phosphatidylinositol-4-phosphate 3-kinase catalytic subunit type 2 alpha	GeneCards
PHGDH	O43175	phosphoglycerate dehydrogenase	GeneCards
PHB2	Q99623	prohibitin 2	GeneCards
PGRMC1	O00264	progesterone receptor membrane component 1	GeneCards
PGK1	P00558	phosphoglycerate kinase 1	GeneCards
PGD	P52209	phosphogluconate dehydrogenase	GeneCards
PFN2	P35080	profilin 2	GeneCards
PEBP1	P30086	phosphatidylethanolamine binding protein 1	GeneCards
PDSS2	Q5JRD6	decaprenyl diphosphate synthase subunit 2	GeneCards
PDLIM1	O00151	PDZ and LIM domain 1	GeneCards
PDE5A	O76074	phosphodiesterase 5A	GeneCards
PDCD10	Q9BUL8	programmed cell death 10	GeneCards
PATJ	Q8NI35	PATJ crumbs cell polarity complex component	GeneCards
PARVA	Q9NVD7	parvin alpha	GeneCards
PARD3B	Q8TEW8	par-3 family cell polarity regulator beta	GeneCards
OTUB1	Q96FW1	OTU deubiquitinase, ubiquitin aldehyde binding 1	GeneCards
OPTN	Q96CV9	optineurin	GeneCards
OLR1	P78380	oxidized low density lipoprotein receptor 1	GeneCards
NUP37	Q8NFH4	nucleoporin 37	GeneCards
NSF	P46459	N-ethylmaleimide sensitive factor, vesicle fusing ATPase	GeneCards
NR1H4	Q96RI1	nuclear receptor subfamily 1 group H member 4	GeneCards
NR1H2	P55055	nuclear receptor subfamily 1 group H member 2	GeneCards
NOD1	Q9Y239	nucleotide binding oligomerization domain containing 1	GeneCards
NEU1	P19838	neuraminidase 1	GeneCards
NEDD8	Q15843	NEDD8 ubiquitin like modifier	GeneCards
NDUFB9	Q9Y6M9	NADH:ubiquinone oxidoreductase subunit B9	GeneCards
NDUFB3	O43676	NADH:ubiquinone oxidoreductase subunit B3	GeneCards
NDUFB10	O96000	NADH:ubiquinone oxidoreductase subunit B10	GeneCards
NDRG2	Q9UN36	NDRG family member 2	GeneCards
NACA	Q13765	nascent polypeptide associated complex subunit alpha	GeneCards
MYH9	Q9GZZ1	myosin heavy chain 9	GeneCards
MFGE8	Q08431	milk fat globule-EGF factor 8 protein	GeneCards
MDM2	P08581	MDM2 proto-oncogene	GeneCards
MCF2	P40926	MCF.2 cell line derived transforming sequence	GeneCards
MAPK1	P10911	mitogen-activated protein kinase 1	GeneCards
MAP2K6	P28482	mitogen-activated protein kinase kinase 6	GeneCards
LTF	P52564	lactotransferrin	GeneCards
LCP1	P02788	lymphocyte cytosolic protein 1	GeneCards
LAP3	P13796	leucine aminopeptidase 3	GeneCards
LAMC1	P28838	laminin subunit gamma 1	GeneCards
KRAS	P11047	KRAS proto-oncogene, GTPase	GeneCards
KPNA4	P01116	karyopherin subunit alpha 4	GeneCards
KLF2	O00629	Kruppel like factor 2	GeneCards
KIAA0319L	Q9Y5W3	KIAA0319 like	GeneCards
KAT8	Q8IZA0	lysine acetyltransferase 8	GeneCards
KAT5	Q9H7Z6	lysine acetyltransferase 5	GeneCards
JAK2	Q92993	Janus kinase 2	GeneCards
ITM2B	O60674	integral membrane protein 2B	GeneCards
ITIH4	Q9Y287	inter-alpha-trypsin inhibitor heavy chain 4	GeneCards
ITGA5	Q14624	integrin subunit alpha 5	GeneCards
ITGA1	P08648	integrin subunit alpha 1	GeneCards
ISOC1	P56199	isochorismatase domain containing 1	GeneCards
INF2	Q96CN7	inverted formin, FH2 and WH2 domain containing	GeneCards
ILK	Q27J81	integrin linked kinase	GeneCards
IGHM	Q13418	immunoglobulin heavy constant mu	GeneCards
HSPE1	P01871	heat shock protein family E (Hsp10) member 1	GeneCards
HSPD1	P61604	heat shock protein family D (Hsp60) member 1	GeneCards
HSPA8	P10809	heat shock protein family A (Hsp70) member 8	GeneCards
HSPA4	P11142	heat shock protein family A (Hsp70) member 4	GeneCards
HSPA1B	P34932	heat shock protein family A (Hsp70) member 1B	GeneCards
HSP90B1	P0DMV9	heat shock protein 90 beta family member 1	GeneCards
HSP90AA1	P14625	heat shock protein 90 alpha family class A member 1	GeneCards
HNRNPDL	P01112	heterogeneous nuclear ribonucleoprotein D like	GeneCards
HLA-C	O14979	major histocompatibility complex, class I, C	GeneCards
HLA-A	P07910	major histocompatibility complex, class I, A	GeneCards
HIF1A	P01892	hypoxia inducible factor 1 subunit alpha	GeneCards
HDAC3	Q16665	histone deacetylase 3	GeneCards
HBB	O15379	hemoglobin subunit beta	GeneCards
GSS	P68871	glutathione synthetase	GeneCards
GRHPR	P48637	glyoxylate and hydroxypyruvate reductase	GeneCards
GREM1	Q9UBQ7	gremlin 1, DAN family BMP antagonist	GeneCards
GRB2	O60565	growth factor receptor bound protein 2	GeneCards
GPX1	P62993	glutathione peroxidase 1	GeneCards
GPD1	P07203	glycerol-3-phosphate dehydrogenase 1	GeneCards
GOLM1	P21695	golgi membrane protein 1	GeneCards
GNB1	Q8NBJ4	G protein subunit beta 1	GeneCards
GLRX	P62873	glutaredoxin	GeneCards
GDA	P35754	guanine deaminase	GeneCards
GBA	Q5SZC3	glucosylceramidase beta	GeneCards
GALNS	P04062	galactosamine (N-acetyl)-6-sulfatase	GeneCards
GALK1	P34059	galactokinase 1	GeneCards
FTCD	P51570	formimidoyltransferase cyclodeaminase	GeneCards
FLNA	O95954	filamin A	GeneCards
FIS1	P21333	fission, mitochondrial 1	GeneCards
FIBP	Q9Y3D6	FGF1 intracellular binding protein	GeneCards
FGG	O43427	fibrinogen gamma chain	GeneCards
FGB	P02679	fibrinogen beta chain	GeneCards
FAT1	P02675	FAT atypical cadherin 1	GeneCards
FAH	Q14517	fumarylacetoacetate hydrolase	GeneCards
F2	P16930	coagulation factor II, thrombin	GeneCards
EZH2	P00734	enhancer of zeste 2 polycomb repressive complex 2 subunit	GeneCards
ERLIN2	Q15910	ER lipid raft associated 2	GeneCards
ENOPH1	O94905	enolase-phosphatase 1	GeneCards
ENO1	Q9UHY7	enolase 1	GeneCards
DYNLL1	P06733	dynein light chain LC8-type 1	GeneCards
DSC1	P63241	desmocollin 1	GeneCards
DNM3	Q08554	dynamin 3	GeneCards
DNM1L	Q9UQ16	dynamin 1 like	GeneCards
DNAJB4	O00429	DnaJ heat shock protein family (Hsp40) member B4	GeneCards
DNAJB1	Q9UDY4	DnaJ heat shock protein family (Hsp40) member B1	GeneCards
DERL2	P25685	derlin 2	GeneCards
DCN	Q9GZP9	decorin	GeneCards
DAD1	P07585	defender against cell death 1	GeneCards
DACH1	P61803	dachshund family transcription factor 1	GeneCards
CXCL8	Q9UI36	C-X-C motif chemokine ligand 8	GeneCards
CTNNB1	P10145	catenin beta 1	GeneCards
CS	P35222	citrate synthase	GeneCards
CRYAB	O75390	crystallin alpha B	GeneCards
CREB1	P02511	cAMP responsive element binding protein 1	GeneCards
CPS1	P16220	carbamoyl-phosphate synthase 1	GeneCards
CPQ	P31327	carboxypeptidase Q	GeneCards
CPM	Q9Y646	carboxypeptidase M	GeneCards
COL4A5	P14384	collagen type IV alpha 5 chain	GeneCards
COL18A1	P29400	collagen type XVIII alpha 1 chain	GeneCards
CLIC5	P39060	chloride intracellular channel 5	GeneCards
CKS1B	Q53G01	CDC28 protein kinase regulatory subunit 1B	GeneCards
CERS2	P61024	ceramide synthase 2	GeneCards
CDKN2A	Q5SZE1	cyclin dependent kinase inhibitor 2A	GeneCards
CDK5RAP2	P42771	CDK5 regulatory subunit associated protein 2	GeneCards
CDK2	Q5JTU8	cyclin dependent kinase 2	GeneCards
CDH11	P24941	cadherin 11	GeneCards
CDC42SE2	P55287	CDC42 small effector 2	GeneCards
CD59	Q9NRR3	CD59 molecule (CD59 blood group)	GeneCards
AL049629.2	P60033	novel protein	GeneCards
CD55	P08174	CD55 molecule (Cromer blood group)	GeneCards
CD151	P48509	CD151 molecule (Raph blood group)	GeneCards
CCNE1	P08571	cyclin E1	GeneCards
CCND1	P24864	cyclin D1	GeneCards
CASK	P14635	calcium/calmodulin dependent serine protein kinase	GeneCards
CAPN2	P17655	calpain 2	GeneCards
CALR	P27797	calreticulin	GeneCards
BLZF1	Q9BY67	basic leucine zipper nuclear factor 1	GeneCards
BHMT	Q93088	betaine--homocysteine S-methyltransferase	GeneCards
BCAR1	P10415	BCAR1 scaffold protein, Cas family member	GeneCards
B2M	P56945	beta-2-microglobulin	GeneCards
ATXN2	Q99700	ataxin 2	GeneCards
ATL1	O75947	atlastin GTPase 1	GeneCards
ASS1	Q8WXF7	argininosuccinate synthase 1	GeneCards
ASAH1	Q13510	N-acylsphingosine amidohydrolase 1	GeneCards
ARL6	Q9H0F7	ADP ribosylation factor like GTPase 6	GeneCards
ARHGDIB	P52566	Rho GDP dissociation inhibitor beta	GeneCards
APTX	Q6JV79	aprataxin	GeneCards
APP	P05067	amyloid beta precursor protein	GeneCards
APOD	P05090	apolipoprotein D	GeneCards
AOC1	P19801	amine oxidase copper containing 1	GeneCards
ANLN	Q9NQW6	anillin actin binding protein	GeneCards
ANKS6	Q68DC2	ankyrin repeat and sterile alpha motif domain containing 6	GeneCards
ANGPTL4	Q9BY76	angiopoietin like 4	GeneCards
ALPL	P05186	alkaline phosphatase, biomineralization associated	GeneCards
ALDOB	P05062	aldolase, fructose-bisphosphate B	GeneCards
ALDOA	P04075	aldolase, fructose-bisphosphate A	GeneCards
ALDH6A1	Q02252	aldehyde dehydrogenase 6 family member A1	GeneCards
ALDH3A2	P51648	aldehyde dehydrogenase 3 family member A2	GeneCards
ALB	P02768	albumin	GeneCards
AKT2	P31751	AKT serine/threonine kinase 2	GeneCards
AKT1	P31749	AKT serine/threonine kinase 1	GeneCards
AKR1A1	Q04828	aldo-keto reductase family 1 member A1	GeneCards
AGMAT	Q9BSE5	agmatinase	GeneCards
ADPRH	P54922	ADP-ribosylarginine hydrolase	GeneCards
ADM	P35318	adrenomedullin	GeneCards
ACVR1	Q04771	activin A receptor type 1	GeneCards
ACP5	P13686	acid phosphatase 5, tartrate resistant	GeneCards
ACMSD	Q8TDX5	aminocarboxymuconate semialdehyde decarboxylase	GeneCards
ABCB1	P08183	ATP binding cassette subfamily B member 1	GeneCards
CEL	X6R868	carboxyl ester lipase	GeneCards
CD2AP	Q9Y5K6	CD2 associated protein	GeneCards
ANGPTL3	Q9Y5C1	angiopoietin like 3	GeneCards
TRAF6	Q9Y4K3	TNF receptor associated factor 6	GeneCards
CHMP3	Q9Y3E7	charged multivesicular body protein 3	GeneCards
TPRKB	Q9Y3C4	TP53RK binding protein	GeneCards
GNE	Q9Y223	glucosamine (UDP-N-acetyl)-2-epimerase/N-acetylmannosamine kinase	GeneCards
FZD4	Q9ULV1	frizzled class receptor 4	GeneCards
CLCF1	Q9UBD9	cardiotrophin like cytokine factor 1	GeneCards
CHMP5	Q9NZZ3	charged multivesicular body protein 5	GeneCards
MYOF	Q9NZM1	myoferlin	GeneCards
ACOT13	Q9NPJ3	acyl-CoA thioesterase 13	GeneCards
SLK	Q9H2G2	STE20 like kinase	GeneCards
PCDH11X	Q9BZA7	protocadherin 11 X-linked	GeneCards
KLF6	Q99612	Kruppel like factor 6	GeneCards
ATOH8	Q96SQ7	atonal bHLH transcription factor 8	GeneCards
HHIP	Q96QV1	hedgehog interacting protein	GeneCards
GGH	Q92820	gamma-glutamyl hydrolase	GeneCards
NUP133	Q8WUM0	nucleoporin 133	GeneCards
HRNR	Q86YZ3	hornerin	GeneCards
SCD5	Q86SK9	stearoyl-CoA desaturase 5	GeneCards
VASN	Q6EMK4	vasorin	GeneCards
GINS1	Q14691	GINS complex subunit 1	GeneCards
GAS6	Q14393	growth arrest specific 6	GeneCards
FOXO1	Q12778	forkhead box O1	GeneCards
CXADR	P78310	CXADR Ig-like cell adhesion molecule	GeneCards
UFM1	P61960	ubiquitin fold modifier 1	GeneCards
WDR4	P57081	WD repeat domain 4	GeneCards
CTSC	P53634	cathepsin C	GeneCards
LUM	P51884	lumican	GeneCards
KRT2	P35908	keratin 2	GeneCards
SDC4	P31431	syndecan 4	GeneCards
RPL12	P30050	ribosomal protein L12	GeneCards
PRDX5	P30044	peroxiredoxin 5	GeneCards
MARCKS	P29966	myristoylated alanine rich protein kinase C substrate	GeneCards
CCN2	P29279	cellular communication network factor 2	GeneCards
NPPC	P23582	natriuretic peptide C	GeneCards
AHCY	P23526	adenosylhomocysteinase	GeneCards
PPIB	P23284	peptidylprolyl isomerase B	GeneCards
GAL	P22466	galanin and GMAP prepropeptide	GeneCards
ATF6	P18850	activating transcription factor 6	GeneCards
PRG2	P13727	proteoglycan 2, pro eosinophil major basic protein	GeneCards
EEF2	P13639	eukaryotic translation elongation factor 2	GeneCards
CXCL1	P09341	C-X-C motif chemokine ligand 1	GeneCards
CTSG	P08311	cathepsin G	GeneCards
THBD	P07204	thrombomodulin	GeneCards
JUN	P05412	Jun proto-oncogene, AP-1 transcription factor subunit	GeneCards
HPRT1	P00492	hypoxanthine phosphoribosyltransferase 1	GeneCards
DYSF	O75923	dysferlin	GeneCards
ZMPSTE24	O75844	zinc metallopeptidase STE24	GeneCards
GPC4	O75487	glypican 4	GeneCards
KMO	O15229	kynurenine 3-monooxygenase	GeneCards
PCNA	P12004	proliferating cell nuclear antigen	DigSee
HRAS	P07900	HRas proto-oncogene, GTPase	DigSee
Gene	logFC	AveExpr	t	P.Value	adj.P.Val	B	regulated	Source
SERPINB2	4.796915	7.218325833	28.68622055	1.56244E-08	0.000695077	7.59163282	Up-Regulated	GEO Database
TMEM156	3.683483333	6.973931667	25.79447184	3.27203E-08	0.000715332	7.337114909	Up-Regulated	GEO Database
IL1B	3.347846667	9.227143333	22.24795745	9.13238E-08	0.001120074	6.918801666	Up-Regulated	GEO Database
SLC7A11	3.073936667	9.445405	20.81269112	1.44896E-07	0.001244971	6.704545846	Up-Regulated	GEO Database
CYP1B1	3.173636667	8.068568333	18.49250565	3.27651E-07	0.001758133	6.284535862	Up-Regulated	GEO Database
SLC7A5	2.227855	9.784639167	15.71194055	1.0032E-06	0.003829217	5.621515112	Up-Regulated	GEO Database
SLC16A6	2.050993333	9.880736667	15.70939058	1.00431E-06	0.003829217	5.620807295	Up-Regulated	GEO Database
CYTIP	2.810436667	6.259255	15.66078302	1.02583E-06	0.003829217	5.607275216	Up-Regulated	GEO Database
GPR110	2.011856667	10.665505	15.45590319	1.12251E-06	0.003837559	5.549399465	Up-Regulated	GEO Database
BCL2A1	2.55551	7.707001667	14.98854386	1.38449E-06	0.004245157	5.412130084	Up-Regulated	GEO Database
IL1A	2.126293333	10.80458667	14.77742615	1.52521E-06	0.004515343	5.34762827	Up-Regulated	GEO Database
PTGS2	2.109123333	8.783761667	14.34177886	1.87023E-06	0.005017717	5.209354671	Up-Regulated	GEO Database
FAM43A	3.53973	7.965391667	13.81810289	2.40865E-06	0.005908348	5.033383836	Up-Regulated	GEO Database
TFPI2	1.75861	10.20772833	13.72552475	2.52118E-06	0.006012595	5.001109164	Up-Regulated	GEO Database
IQCD	2.755266667	7.631966667	13.41336374	2.94716E-06	0.006333735	4.889582693	Up-Regulated	GEO Database
ALDH1A3	1.949163333	8.505725	12.85455818	3.93129E-06	0.007240058	4.679025318	Up-Regulated	GEO Database
CCL3	1.629	6.765336667	12.83905217	3.9635E-06	0.007240058	4.672974089	Up-Regulated	GEO Database
EREG	1.89871	7.072058333	12.55179351	4.61805E-06	0.008002715	4.558744988	Up-Regulated	GEO Database
KYNU	2.334845	8.217860833	12.11970269	5.84787E-06	0.00947288	4.379036373	Up-Regulated	GEO Database
TXNRD1	1.488436667	9.831615	11.98630947	6.29989E-06	0.009839971	4.321559313	Up-Regulated	GEO Database
PLAT	1.934253333	9.273873333	11.92501669	6.52081E-06	0.009997103	4.294822905	Up-Regulated	GEO Database
CCL20	1.563133333	11.00263333	11.748716	7.20698E-06	0.010458726	4.216751731	Up-Regulated	GEO Database
IL1F9	2.263256667	5.491801667	11.72409391	7.30919E-06	0.010458726	4.205708598	Up-Regulated	GEO Database
TTC29	1.573826667	7.409366667	11.56067548	8.03084E-06	0.01112064	4.131530179	Up-Regulated	GEO Database
LOC344887	2.512843333	6.349501667	11.41306638	8.7529E-06	0.011741744	4.063183395	Up-Regulated	GEO Database
RPGR	1.490765	9.7476175	11.19406474	9.96428E-06	0.012048744	3.959363243	Up-Regulated	GEO Database
GMEB1	1.637516667	6.302141667	11.19001998	9.98838E-06	0.012048744	3.957418097	Up-Regulated	GEO Database
FOSB	1.93897	5.571501667	10.79380555	1.27045E-05	0.013456078	3.761849406	Up-Regulated	GEO Database
ZCWPW1	1.776843333	4.749031667	10.68852697	1.35611E-05	0.013860426	3.708165971	Up-Regulated	GEO Database
LPXN	1.374563333	8.919901667	10.60422828	1.42944E-05	0.014438056	3.664644075	Up-Regulated	GEO Database
CXCL2	1.907506667	10.04794667	10.37557161	1.6521E-05	0.016118077	3.544136574	Up-Regulated	GEO Database
PRDM1	1.899963333	7.218431667	10.24579186	1.79585E-05	0.016554183	3.474104817	Up-Regulated	GEO Database
MAP3K8	1.31934	9.679096667	10.23159229	1.81242E-05	0.016554183	3.466369159	Up-Regulated	GEO Database
AREG	1.62698	7.354086667	9.927401339	2.21269E-05	0.017454204	3.297095307	Up-Regulated	GEO Database
CCL3L1	1.343626667	8.00052	9.770225656	2.45823E-05	0.018513066	3.206899504	Up-Regulated	GEO Database
C15orf21	1.567383333	6.788345	9.685239245	2.60378E-05	0.018698225	3.157331297	Up-Regulated	GEO Database
IL1R1	1.549706667	9.304993333	9.682826644	2.60805E-05	0.018698225	3.155915861	Up-Regulated	GEO Database
NRG1	1.2506	10.87176667	9.679759968	2.61349E-05	0.018698225	3.154116026	Up-Regulated	GEO Database
TMEM156	3.061006667	5.17436	9.646821864	2.67276E-05	0.018808767	3.134737668	Up-Regulated	GEO Database
ARHGAP22	1.272496667	7.762578333	9.578830441	2.79998E-05	0.01916807	3.094463303	Up-Regulated	GEO Database
FLJ41603	1.75874	7.41923	9.572006103	2.81312E-05	0.01916807	3.090400496	Up-Regulated	GEO Database
INSIG1	1.304436667	10.158215	9.310259921	3.37418E-05	0.022020987	2.931704883	Up-Regulated	GEO Database
ZNF137	1.420823333	6.774175	9.273937724	3.46163E-05	0.022020987	2.909233871	Up-Regulated	GEO Database
SLAMF7	2.255153333	7.198526667	9.26306314	3.48831E-05	0.022020987	2.902484576	Up-Regulated	GEO Database
HMOX1	1.377151667	9.549104167	9.210669868	3.62015E-05	0.022248332	2.869826195	Up-Regulated	GEO Database
CD44	2.235763333	6.945658333	9.187668777	3.67981E-05	0.022248332	2.855414998	Up-Regulated	GEO Database
SP140	1.129903333	8.630465	9.155647173	3.76472E-05	0.022475373	2.835276536	Up-Regulated	GEO Database
BCAS1	2.055856667	6.444738333	9.113139374	3.88089E-05	0.022821235	2.808406767	Up-Regulated	GEO Database
SKA3	1.258643333	9.737445	9.083212697	3.96511E-05	0.023155448	2.789395755	Up-Regulated	GEO Database
TNFAIP6	1.296633333	9.200508333	9.046234612	4.07205E-05	0.023463204	2.765797451	Up-Regulated	GEO Database
TMEM45A	1.214313333	5.458753333	9.01585568	4.16235E-05	0.023823621	2.746320836	Up-Regulated	GEO Database
CASC5	1.731543333	9.765795	8.99400924	4.22869E-05	0.02404303	2.732264337	Up-Regulated	GEO Database
CSF3	1.436596667	7.093538333	8.819556525	4.80354E-05	0.025623633	2.618490079	Up-Regulated	GEO Database
MST131	1.09359	10.56687167	8.80236298	4.86483E-05	0.025623633	2.607128118	Up-Regulated	GEO Database
EHF	1.4398	11.2642	8.766427489	4.99581E-05	0.026153066	2.583293724	Up-Regulated	GEO Database
PSMC3IP	1.236536667	9.386981667	8.755541535	5.03627E-05	0.026204388	2.576050187	Up-Regulated	GEO Database
CXCL12	1.302253333	6.4088	8.747431048	5.06666E-05	0.026204388	2.570646364	Up-Regulated	GEO Database
KIF14	1.11907	8.286081667	8.686996277	5.29972E-05	0.027184001	2.530188736	Up-Regulated	GEO Database
ZNF804A	1.314413333	5.92631	8.66513025	5.38702E-05	0.027205715	2.51546712	Up-Regulated	GEO Database
OSBPL9	1.38441	5.204591667	8.590979928	5.69538E-05	0.027787724	2.465210902	Up-Regulated	GEO Database
DHRS3	1.41441	7.125085	8.539170988	5.92269E-05	0.028230503	2.429788659	Up-Regulated	GEO Database
GPR15	2.358643333	5.212058333	8.456281083	6.30802E-05	0.028654421	2.372582734	Up-Regulated	GEO Database
KBTBD8	1.491983333	6.899108333	8.382980497	6.67251E-05	0.029386297	2.321441588	Up-Regulated	GEO Database
TNFAIP3	1.550056667	10.26603833	8.371464653	6.73191E-05	0.029386297	2.313359452	Up-Regulated	GEO Database
PCDHA3	1.60332	5.279296667	8.322430116	6.99161E-05	0.029612799	2.278799781	Up-Regulated	GEO Database
ASPH	1.176706667	9.332703333	8.317191554	7.02002E-05	0.029612799	2.275093609	Up-Regulated	GEO Database
TMPRSS2	3.420526667	6.17018	8.29650752	7.13346E-05	0.029612799	2.260433537	Up-Regulated	GEO Database
ICOSLG	1.371413333	7.475856667	8.28952517	7.17223E-05	0.029612799	2.255475125	Up-Regulated	GEO Database
NQO1	1.33522	9.854056667	8.226913368	7.53067E-05	0.030414183	2.210795026	Up-Regulated	GEO Database
CSF2	1.422616667	8.113765	8.224498244	7.5449E-05	0.030414183	2.20906372	Up-Regulated	GEO Database
C12orf48	1.17288	10.32516	8.175184158	7.84212E-05	0.030884285	2.173583911	Up-Regulated	GEO Database
POPDC3	1.284503333	9.171375	8.164510976	7.90818E-05	0.031002223	2.165872554	Up-Regulated	GEO Database
FEZ1	1.278286667	8.899203333	8.049748619	8.65961E-05	0.032310681	2.082222169	Up-Regulated	GEO Database
ARMC9	1.077653333	8.85731	8.032284984	8.78088E-05	0.032310681	2.069374109	Up-Regulated	GEO Database
STC2	1.57873	9.257491667	8.020087447	8.86672E-05	0.032310681	2.060381573	Up-Regulated	GEO Database
MST150	1.052666667	8.09046	8.002813116	8.98991E-05	0.032310681	2.047619742	Up-Regulated	GEO Database
CASC5	1.040608333	9.823129167	7.998589013	9.02033E-05	0.032310681	2.044494352	Up-Regulated	GEO Database
GSTM2	1.270073333	8.15795	7.983677512	9.12864E-05	0.032310681	2.033446525	Up-Regulated	GEO Database
RNU1A	1.313996667	9.753368333	7.982705622	9.13575E-05	0.032310681	2.032725652	Up-Regulated	GEO Database
ASNS	1.244763333	10.61915167	7.949100729	9.38548E-05	0.032657224	2.007739243	Up-Regulated	GEO Database
SMAD3	1.008785	10.04099083	7.920713793	9.60245E-05	0.032657224	1.986540035	Up-Regulated	GEO Database
BTN2A3	1.080996667	8.738338333	7.844086128	0.00010217	0.034046723	1.928888523	Up-Regulated	GEO Database
SH3BGR	1.507186667	7.008433333	7.811892123	0.000104883	0.034046723	1.904480024	Up-Regulated	GEO Database
SGOL1	1.00976	9.797353333	7.772761652	0.000108291	0.034691105	1.874662274	Up-Regulated	GEO Database
ATRIP	1.45676	6.30424	7.756581274	0.000109737	0.034887756	1.862284281	Up-Regulated	GEO Database
VEGFA	1.288433333	9.50841	7.613231933	0.000123539	0.035431845	1.751371379	Up-Regulated	GEO Database
CEP55	1.02835	10.31929167	7.609503286	0.000123924	0.035431845	1.748456171	Up-Regulated	GEO Database
ZC3H12C	1.00646	9.682471667	7.587366545	0.000126233	0.035650009	1.731116876	Up-Regulated	GEO Database
PTHLH	1.053363333	7.139371667	7.554300594	0.000129773	0.035721655	1.705114936	Up-Regulated	GEO Database
MAPKAP1	1.55958	5.7378	7.550098936	0.000130231	0.035721655	1.701802116	Up-Regulated	GEO Database
SKA1	1.03427	7.20375	7.501632283	0.000135646	0.036160688	1.663444542	Up-Regulated	GEO Database
KIF3A	1.011563333	7.818508333	7.49081279	0.00013689	0.036273246	1.654845501	Up-Regulated	GEO Database
EXO1	1.305646667	8.509746667	7.45451348	0.000141156	0.036437499	1.6258986	Up-Regulated	GEO Database
RNGTT	1.703253333	5.70326	7.423853836	0.000144876	0.03681076	1.601331903	Up-Regulated	GEO Database
LOC390940	1.214743333	7.667895	7.408535088	0.000146776	0.036933796	1.589017054	Up-Regulated	GEO Database
C6orf150	1.05497	8.246115	7.378030997	0.000150643	0.037487905	1.56441414	Up-Regulated	GEO Database
BNIP1	1.43334	7.18423	7.366031106	0.000152196	0.037764871	1.554706238	Up-Regulated	GEO Database
CCDC150	1.064283333	8.410965	7.310753894	0.000159586	0.038209324	1.509771118	Up-Regulated	GEO Database
KLHL5	1.0573	11.46348333	7.297749779	0.000161383	0.038209324	1.499148233	Up-Regulated	GEO Database
CTH	1.372753333	7.64271	7.278456464	0.000164091	0.03832657	1.483351276	Up-Regulated	GEO Database
SLC22A1	1.028153333	5.80183	7.268195242	0.000165552	0.038518336	1.474931796	Up-Regulated	GEO Database
NRCAM	1.085233333	9.505726667	7.218277763	0.000172871	0.039624473	1.433796612	Up-Regulated	GEO Database
TBX3	1.264756667	9.187805	7.213857561	0.000173536	0.039624473	1.430139868	Up-Regulated	GEO Database
OTUB2	1.868273333	6.661013333	7.204088158	0.000175018	0.039751227	1.422049604	Up-Regulated	GEO Database
CHAC1	1.299493333	7.676366667	7.194218416	0.000176528	0.039778671	1.41386472	Up-Regulated	GEO Database
GCH1	1.00353	8.385268333	7.116346987	0.000188977	0.040833555	1.348878171	Up-Regulated	GEO Database
CCDC66	1.132413333	5.97404	7.111440383	0.000189794	0.040833555	1.344759025	Up-Regulated	GEO Database
FAM54A	1.113325	7.808585833	7.10873371	0.000190246	0.040833555	1.342485501	Up-Regulated	GEO Database
OTUB2	1.221533333	8.452353333	7.062166375	0.000198222	0.04191658	1.303231411	Up-Regulated	GEO Database
TRIB3	1.262926667	6.318853333	7.045455071	0.000201175	0.042332546	1.28908031	Up-Regulated	GEO Database
CA12	1.35567	7.76778	7.017656662	0.000206198	0.042864201	1.265465123	Up-Regulated	GEO Database
IGFN1	1.17158	9.070023333	7.011298373	0.000207367	0.042899386	1.260050359	Up-Regulated	GEO Database
DNAJB9	1.47954	9.001713333	6.998117451	0.000209813	0.042991115	1.248809585	Up-Regulated	GEO Database
ABCA1	1.319403333	8.046841667	6.978405562	0.000213532	0.04303427	1.231959277	Up-Regulated	GEO Database
NUF2	1.048296667	9.135111667	6.956828368	0.000217689	0.043769227	1.213459491	Up-Regulated	GEO Database
SF3B2	1.22349	6.340531667	6.91977642	0.000225041	0.044714562	1.181557433	Up-Regulated	GEO Database
PREX2	1.271983333	6.546131667	6.905462429	0.000227955	0.044895594	1.169187232	Up-Regulated	GEO Database
ESCO2	1.151686667	9.15311	6.898377401	0.000229413	0.044895594	1.163054868	Up-Regulated	GEO Database
OR5V1	1.79173	6.734151667	6.887190129	0.000231738	0.044895594	1.153359078	Up-Regulated	GEO Database
IRAK2	1.302766667	8.904623333	6.866989578	0.000236002	0.044895594	1.135811951	Up-Regulated	GEO Database
FOXJ3	1.447136667	7.853245	6.860973672	0.000237288	0.044895594	1.130576362	Up-Regulated	GEO Database
ADAMTS9	1.113976667	8.310055	6.838339274	0.000242201	0.045204232	1.110837053	Up-Regulated	GEO Database
EIF2C2	1.673053333	6.494166667	6.83411754	0.00024313	0.045279174	1.107148161	Up-Regulated	GEO Database
C3orf67	1.078633333	8.71038	6.814795212	0.000247433	0.0458983	1.090235843	Up-Regulated	GEO Database
NRIP3	1.1507	8.093991667	6.786095193	0.000253984	0.046592965	1.065028172	Up-Regulated	GEO Database
DUSP5	1.083711667	7.402749167	6.77582473	0.000256375	0.046931359	1.055982032	Up-Regulated	GEO Database
UPP1	1.528683333	8.734268333	6.75790492	0.000260608	0.047257773	1.040166211	Up-Regulated	GEO Database
IER3	1.074733333	10.83886667	6.718832403	0.000270113	0.047595127	1.005538819	Up-Regulated	GEO Database
ERCC6L	1.038696667	7.243391667	6.695126599	0.000276069	0.047895621	0.984434336	Up-Regulated	GEO Database
CMPK2	1.05728	9.720693333	6.644103927	0.000289397	0.04835608	0.938764184	Up-Regulated	GEO Database
AQP1	-3.773276667	7.460151667	-22.43664624	8.61334E-08	0.001120074	6.944779255	Down-Regulated	GEO Database
C5orf23	-2.761856667	7.444565	-22.26973729	9.07069E-08	0.001120074	6.921824645	Down-Regulated	GEO Database
NPR3	-3.63394	7.145056667	-19.09847316	2.6235E-07	0.001732602	6.404235599	Down-Regulated	GEO Database
ODZ2	-2.446876667	8.633018333	-18.62275866	3.12181E-07	0.001758133	6.310920133	Down-Regulated	GEO Database
HMCN1	-2.26619	7.168833333	-15.40897529	1.14609E-06	0.003837559	5.535949526	Down-Regulated	GEO Database
ANK3	-2.29936	8.13266	-14.43612457	1.78855E-06	0.00495337	5.239906681	Down-Regulated	GEO Database
IGFBP3	-1.926683333	10.46885833	-13.48797164	2.83835E-06	0.006333735	4.916623033	Down-Regulated	GEO Database
KCNJ6	-2.137713333	6.849628333	-12.92616999	3.78635E-06	0.007223844	4.706822189	Down-Regulated	GEO Database
HHAT	-2.14743	6.587765	-12.53472543	4.66065E-06	0.008002715	4.551828784	Down-Regulated	GEO Database
MMEL1	-1.725643333	6.471988333	-12.23879363	5.47525E-06	0.00920532	4.429541633	Down-Regulated	GEO Database
FRY	-2.525091667	6.230900833	-11.74718761	7.21328E-06	0.010458726	4.216067244	Down-Regulated	GEO Database
WNT2B	-2.12378	7.930246667	-11.68176192	7.48879E-06	0.010540047	4.18664142	Down-Regulated	GEO Database
PRSS23	-1.601716667	10.29984167	-11.42300595	8.70203E-06	0.011741744	4.067826368	Down-Regulated	GEO Database
TLL1	-1.878576667	8.135118333	-11.35628488	9.05009E-06	0.011877717	4.036545711	Down-Regulated	GEO Database
SYTL2	-1.4845	11.23785	-11.33222781	9.17944E-06	0.011877717	4.025201173	Down-Regulated	GEO Database
APEH	-2.461906667	6.005043333	-11.2907098	9.40765E-06	0.011877717	4.00553987	Down-Regulated	GEO Database
ST7L	-1.72623	7.925538333	-11.16141487	1.01607E-05	0.012048744	3.943632703	Down-Regulated	GEO Database
DHRS2	-3.24634	6.802433333	-10.96258369	1.14563E-05	0.013046193	3.846388732	Down-Regulated	GEO Database
PRPS1	-1.445366667	10.92331667	-10.94936869	1.15488E-05	0.013046193	3.839836257	Down-Regulated	GEO Database
C1orf161	-1.895058333	6.7884025	-10.84443023	1.23146E-05	0.013382983	3.787402233	Down-Regulated	GEO Database
NPPB	-1.608008333	8.0076975	-10.78648394	1.2762E-05	0.013456078	3.75813983	Down-Regulated	GEO Database
ST6GAL2	-2.385923333	8.134341667	-10.40035882	1.62615E-05	0.016118077	3.557376148	Down-Regulated	GEO Database
NRXN3	-1.682153333	6.64653	-10.38193582	1.64539E-05	0.016118077	3.547540019	Down-Regulated	GEO Database
TSPAN18	-1.42473	9.148708333	-10.32209033	1.70969E-05	0.016309334	3.515422569	Down-Regulated	GEO Database
S1PR1	-1.337126667	6.537503333	-10.25367403	1.78672E-05	0.016554183	3.478392596	Down-Regulated	GEO Database
COL1A1	-1.81339	6.284558333	-10.19953856	1.85047E-05	0.016554183	3.448853243	Down-Regulated	GEO Database
ITGB6	-1.463496667	7.935345	-10.1643205	1.89333E-05	0.016554183	3.429522061	Down-Regulated	GEO Database
PSG8	-1.783853333	8.03867	-10.15926409	1.89957E-05	0.016554183	3.426739171	Down-Regulated	GEO Database
RNF150	-1.49795	7.756571667	-10.05355393	2.03563E-05	0.016804546	3.368129002	Down-Regulated	GEO Database
COL12A1	-1.283463333	9.488535	-9.997057328	2.11286E-05	0.017200915	3.336464879	Down-Regulated	GEO Database
SUSD4	-1.499198333	9.686674167	-9.978845554	2.13846E-05	0.017200915	3.326206923	Down-Regulated	GEO Database
FAT3	-1.48068	6.162591667	-9.894277063	2.26203E-05	0.017454204	3.278244455	Down-Regulated	GEO Database
RING1	-1.78944	6.000843333	-9.871100098	2.2973E-05	0.017454204	3.265004782	Down-Regulated	GEO Database
UCP2	-1.196355	9.018520833	-9.62624759	2.71055E-05	0.01891964	3.122589558	Down-Regulated	GEO Database
PPARGC1A	-2.121988333	8.027534167	-9.611745034	2.73755E-05	0.018954024	3.114006227	Down-Regulated	GEO Database
SEMA3E	-1.538386667	9.255356667	-9.505929384	2.94406E-05	0.019902342	3.050867928	Down-Regulated	GEO Database
OLFM1	-1.23637	5.713995	-9.353678662	3.27292E-05	0.021782397	2.958420922	Down-Regulated	GEO Database
KRT7	-1.477223333	10.177055	-9.273908355	3.4617E-05	0.022020987	2.909215656	Down-Regulated	GEO Database
HIST1H2BD	-1.246086667	8.75709	-9.239533788	3.54684E-05	0.022227009	2.887846844	Down-Regulated	GEO Database
KAAG1	-1.262548333	8.7820375	-9.21129659	3.61854E-05	0.022248332	2.870218232	Down-Regulated	GEO Database
NPNT	-1.288366667	9.800316667	-9.143461004	3.79762E-05	0.022485567	2.82758945	Down-Regulated	GEO Database
PAM	-1.21518	9.967076667	-8.923279128	4.45182E-05	0.024980803	2.686464583	Down-Regulated	GEO Database
ACPL2	-1.60091	7.0989	-8.906526786	4.5066E-05	0.025123987	2.675551581	Down-Regulated	GEO Database
TAGLN3	-1.808183333	9.154531667	-8.887189276	4.57078E-05	0.02516347	2.662923201	Down-Regulated	GEO Database
OXTR	-1.392285	8.842765833	-8.882554607	4.58632E-05	0.02516347	2.659891528	Down-Regulated	GEO Database
COL8A1	-1.133233333	10.76298333	-8.878010827	4.60161E-05	0.02516347	2.65691743	Down-Regulated	GEO Database
PLEKHH2	-1.229056667	9.663638333	-8.667068572	5.37922E-05	0.027205715	2.516773924	Down-Regulated	GEO Database
ARMC4	-1.523118333	7.736805833	-8.631254386	5.52549E-05	0.027741845	2.492571466	Down-Regulated	GEO Database
TGFB2	-1.345396667	9.875668333	-8.618824144	5.57731E-05	0.027787724	2.484143249	Down-Regulated	GEO Database
PSG5	-1.14913	8.174261667	-8.608215449	5.62197E-05	0.027787724	2.476938614	Down-Regulated	GEO Database
RNASET2	-1.353731667	9.765300833	-8.590729206	5.69646E-05	0.027787724	2.465040093	Down-Regulated	GEO Database
PIK3IP1	-1.304876667	6.35098	-8.55277501	5.86203E-05	0.028230503	2.439114547	Down-Regulated	GEO Database
NEDD9	-1.220716667	7.788148333	-8.545954302	5.89235E-05	0.028230503	2.434440989	Down-Regulated	GEO Database
TM4SF4	-1.874503333	6.498311667	-8.532734046	5.95164E-05	0.028230503	2.425369829	Down-Regulated	GEO Database
SLC6A6	-1.29526	8.98384	-8.47944445	6.19756E-05	0.028654421	2.388635275	Down-Regulated	GEO Database
TTC28	-1.234286667	8.285296667	-8.478211384	6.20338E-05	0.028654421	2.387782047	Down-Regulated	GEO Database
HLA-DOA	-1.111313333	8.169586667	-8.431770167	6.42733E-05	0.029042753	2.355539823	Down-Regulated	GEO Database
HAPLN1	-1.117433333	11.3889	-8.419758314	6.48674E-05	0.029157707	2.34716647	Down-Regulated	GEO Database
FILIP1L	-1.323193333	10.09200333	-8.412664312	6.52211E-05	0.029164017	2.342214715	Down-Regulated	GEO Database
LAMP2	-1.217643333	9.352088333	-8.370865632	6.73501E-05	0.029386297	2.312938686	Down-Regulated	GEO Database
NPFFR2	-1.444313333	10.03781	-8.369334324	6.74296E-05	0.029386297	2.311862903	Down-Regulated	GEO Database
FRAS1	-1.493528333	6.403769167	-8.355081793	6.81744E-05	0.029560841	2.301839093	Down-Regulated	GEO Database
KLHL13	-1.94782	7.121453333	-8.310431202	7.05687E-05	0.029612799	2.270306788	Down-Regulated	GEO Database
LPHN3	-1.094268333	8.196240833	-8.29038459	7.16744E-05	0.029612799	2.256085691	Down-Regulated	GEO Database
C4orf49	-1.324353333	7.45477	-8.28914515	7.17435E-05	0.029612799	2.25520512	Down-Regulated	GEO Database
HNMT	-1.269785	8.570684167	-8.257112286	7.35532E-05	0.030214527	2.232394037	Down-Regulated	GEO Database
PLXDC2	-1.284403333	6.519688333	-8.234634717	7.48539E-05	0.030414183	2.216326224	Down-Regulated	GEO Database
COL11A1	-1.0432	7.836823333	-8.216715959	7.59094E-05	0.030453872	2.203480922	Down-Regulated	GEO Database
SESN3	-1.338755	8.1064775	-8.204210127	7.66561E-05	0.030510213	2.194496812	Down-Regulated	GEO Database
PDE11A	-2.303396667	6.608125	-8.202470024	7.67606E-05	0.030510213	2.193245484	Down-Regulated	GEO Database
VWA5A	-2.144103333	6.618055	-8.144078116	8.0364E-05	0.031361681	2.151077573	Down-Regulated	GEO Database
SLC8A1	-1.147091667	9.410565833	-8.121333905	8.18189E-05	0.031499925	2.134558982	Down-Regulated	GEO Database
CRIM1	-1.075318333	10.7989575	-8.10109448	8.31387E-05	0.031749443	2.119815098	Down-Regulated	GEO Database
TXNIP	-1.143873333	10.58336333	-8.10006231	8.32067E-05	0.031749443	2.119062065	Down-Regulated	GEO Database
TNS1	-1.146973333	10.00238	-8.069765559	8.52293E-05	0.032310681	2.096909903	Down-Regulated	GEO Database
NLGN1	-1.440596667	6.692888333	-8.037840909	8.74209E-05	0.032310681	2.073465051	Down-Regulated	GEO Database
GALNT14	-1.040066667	11.0589	-8.019776756	8.86892E-05	0.032310681	2.060152317	Down-Regulated	GEO Database
FAM13C	-1.250315	5.5516025	-8.015980428	8.89583E-05	0.032310681	2.057350228	Down-Regulated	GEO Database
OPN3	-1.209533333	7.23051	-8.013073729	8.91651E-05	0.032310681	2.055203764	Down-Regulated	GEO Database
PPFIA4	-1.036966667	3.99688	-8.007203328	8.95842E-05	0.032310681	2.050866062	Down-Regulated	GEO Database
C4BPB	-1.31063	6.420363333	-8.006338935	8.96461E-05	0.032310681	2.05022705	Down-Regulated	GEO Database
CARM1	-1.41843	5.107931667	-7.995160227	9.0451E-05	0.032310681	2.041956045	Down-Regulated	GEO Database
KIAA1217	-1.868703333	5.844708333	-7.975377819	9.18956E-05	0.032334438	2.027287269	Down-Regulated	GEO Database
SEMA4D	-1.651963333	7.204908333	-7.967758814	9.24589E-05	0.032399849	2.021626805	Down-Regulated	GEO Database
CALCRL	-1.536211667	6.773835833	-7.941787697	9.44084E-05	0.032657224	2.002286033	Down-Regulated	GEO Database
PDLIM7	-1.098676667	6.640648333	-7.926166909	9.56034E-05	0.032657224	1.990618988	Down-Regulated	GEO Database
CDH6	-1.183173333	9.98768	-7.920035256	9.60771E-05	0.032657224	1.986032266	Down-Regulated	GEO Database
FANK1	-1.141876667	10.087795	-7.885399653	9.88032E-05	0.033396255	1.960048703	Down-Regulated	GEO Database
SYNPO	-1.0399	6.33292	-7.849082422	0.000101756	0.034046723	1.932666598	Down-Regulated	GEO Database
DOPEY2	-1.008813333	8.816818333	-7.837121832	0.00010275	0.034046723	1.923617834	Down-Regulated	GEO Database
ST3GAL5	-1.044546667	9.239653333	-7.83312209	0.000103085	0.034046723	1.920588417	Down-Regulated	GEO Database
PDE1C	-1.105766667	11.08075	-7.817580441	0.000104398	0.034046723	1.908800827	Down-Regulated	GEO Database
SSPN	-1.461203333	7.248401667	-7.817530643	0.000104402	0.034046723	1.908763015	Down-Regulated	GEO Database
HIST1H1A	-1.193216667	7.830878333	-7.809476978	0.00010509	0.034046723	1.902644445	Down-Regulated	GEO Database
HSPG2	-1.37458	7.375523333	-7.782913955	0.000107395	0.034643087	1.882414305	Down-Regulated	GEO Database
BAI3	-1.055363333	7.031811667	-7.779020559	0.000107738	0.034643087	1.879442729	Down-Regulated	GEO Database
TPD52L1	-1.025236667	9.220881667	-7.767836719	0.000108729	0.034701842	1.870897705	Down-Regulated	GEO Database
ZNF248	-1.03978	8.295156667	-7.744263428	0.000110852	0.03494508	1.852842068	Down-Regulated	GEO Database
TAGLN	-2.487286667	8.620886667	-7.739891145	0.000111251	0.03494508	1.849486536	Down-Regulated	GEO Database
RELN	-1.04586	9.467133333	-7.728481531	0.000112299	0.035059365	1.840720358	Down-Regulated	GEO Database
MAVS	-1.205386667	5.605456667	-7.721893957	0.00011291	0.035122233	1.83565256	Down-Regulated	GEO Database
C21orf7	-1.2166	11.11033333	-7.712538867	0.000113783	0.035266133	1.828447573	Down-Regulated	GEO Database
ENAH	-1.156446667	10.07711	-7.691611415	0.000115764	0.035383287	1.812295241	Down-Regulated	GEO Database
SPEG	-1.61566	5.243866667	-7.670413779	0.000117811	0.035383287	1.795885359	Down-Regulated	GEO Database
AIF1L	-1.124793333	10.65135333	-7.666940884	0.00011815	0.035383287	1.793192145	Down-Regulated	GEO Database
ABI3BP	-1.448116667	9.025961667	-7.665282046	0.000118313	0.035383287	1.791905256	Down-Regulated	GEO Database
STAP2	-1.329203333	6.187735	-7.661058181	0.000118728	0.035383287	1.788627105	Down-Regulated	GEO Database
TRIM6	-1.068683333	7.718071667	-7.645148816	0.000120304	0.035383287	1.776262129	Down-Regulated	GEO Database
TUBA1A	-1.155763333	10.408835	-7.643130062	0.000120506	0.035383287	1.774691125	Down-Regulated	GEO Database
EDN1	-1.126586667	9.458326667	-7.632724274	0.000121552	0.035431845	1.766586135	Down-Regulated	GEO Database
ASTN2	-1.054696667	7.34636	-7.625639174	0.00012227	0.035431845	1.761060736	Down-Regulated	GEO Database
C14orf105	-1.197383333	9.60133	-7.614550255	0.000123404	0.035431845	1.752401726	Down-Regulated	GEO Database
COL4A1	-1.002013333	9.160513333	-7.611769074	0.00012369	0.035431845	1.750227841	Down-Regulated	GEO Database
MAPK10	-1.606038333	7.374810833	-7.606613085	0.000124222	0.035431845	1.74619543	Down-Regulated	GEO Database
RGS5	-1.47875	7.969645	-7.59830456	0.000125086	0.035559998	1.739691247	Down-Regulated	GEO Database
C20orf96	-1.129663333	5.185805	-7.57599462	0.000127438	0.035721655	1.722188191	Down-Regulated	GEO Database
BAAT	-1.179456667	8.185701667	-7.575964007	0.000127441	0.035721655	1.722164136	Down-Regulated	GEO Database
ADAMTSL1	-1.058466667	8.150513333	-7.572631485	0.000127797	0.035721655	1.71954485	Down-Regulated	GEO Database
EFHD1	-1.35925	7.560061667	-7.558627031	0.000129304	0.035721655	1.708524067	Down-Regulated	GEO Database
DOCK2	-1.061313333	7.471306667	-7.555324372	0.000129662	0.035721655	1.705921839	Down-Regulated	GEO Database
UGT1A6	-1.021283333	10.532225	-7.514502504	0.000134184	0.036160688	1.67365618	Down-Regulated	GEO Database
TINAGL1	-1.31221	6.665758333	-7.510065254	0.000134686	0.036160688	1.670137644	Down-Regulated	GEO Database
HIST1H2BC	-1.963103333	6.936585	-7.507461968	0.000134982	0.036160688	1.66807232	Down-Regulated	GEO Database
PLCB4	-1.1657	10.99858333	-7.500737399	0.000135749	0.036160688	1.662733816	Down-Regulated	GEO Database
PRUNE2	-1.171496667	8.007661667	-7.478701361	0.000138297	0.036371418	1.645203903	Down-Regulated	GEO Database
TRIM22	-1.677096667	7.642245	-7.475849935	0.00013863	0.036371418	1.642931532	Down-Regulated	GEO Database
SERPINB13	-1.04841	4.903368333	-7.472931905	0.000138973	0.036371418	1.640605124	Down-Regulated	GEO Database
TNFRSF19	-1.11631	7.493801667	-7.4694835	0.000139378	0.036371418	1.637854624	Down-Regulated	GEO Database
TPM1	-1.139566667	10.84598333	-7.462845847	0.000140163	0.036437499	1.632556519	Down-Regulated	GEO Database
C5orf13	-1.24826	8.14522	-7.453061609	0.000141329	0.036437499	1.624737682	Down-Regulated	GEO Database
TMED4	-1.24157	8.595908333	-7.432039806	0.000143872	0.03681076	1.607901619	Down-Regulated	GEO Database
SLC40A1	-1.03017	8.229165	-7.423486547	0.000144921	0.03681076	1.601036952	Down-Regulated	GEO Database
ID2	-1.484515	6.784010833	-7.410178513	0.00014657	0.036933796	1.590339506	Down-Regulated	GEO Database
GARNL3	-1.308736667	7.235558333	-7.400681743	0.000147761	0.036933796	1.582693232	Down-Regulated	GEO Database
NOS1AP	-1.370463333	5.538828333	-7.330221746	0.000156938	0.038209324	1.525637209	Down-Regulated	GEO Database
C4orf18	-1.302353333	7.02269	-7.318366908	0.000158545	0.038209324	1.51598091	Down-Regulated	GEO Database
CNTN1	-1.679733333	7.566893333	-7.307401345	0.000160047	0.038209324	1.507034359	Down-Regulated	GEO Database
KLF7	-1.097406667	9.218416667	-7.296185026	0.000161601	0.038209324	1.497868673	Down-Regulated	GEO Database
UBA1	-1.452126667	8.166413333	-7.292671482	0.000162091	0.038209324	1.494994465	Down-Regulated	GEO Database
SLC1A1	-1.350288333	8.763030833	-7.277257306	0.000164261	0.03832657	1.482367989	Down-Regulated	GEO Database
TTLL6	-1.611618333	6.926700833	-7.247616225	0.000168526	0.038894159	1.458009044	Down-Regulated	GEO Database
GMDS	-1.02612	7.90023	-7.238898996	0.000169804	0.039084055	1.45082553	Down-Regulated	GEO Database
AMY1A	-1.640646667	6.11836	-7.21456463	0.00017343	0.039624473	1.430724968	Down-Regulated	GEO Database
CCDC80	-1.223866667	11.21173333	-7.205135381	0.000174858	0.039751227	1.422917376	Down-Regulated	GEO Database
CARD10	-1.12048	6.188126667	-7.196754136	0.000176139	0.039778671	1.415968675	Down-Regulated	GEO Database
CTSC	-1.20701	8.931415	-7.186260709	0.000177757	0.039950717	1.407257018	Down-Regulated	GEO Database
FOXP2	-2.079016667	5.874261667	-7.180933454	0.000178585	0.040032017	1.402829298	Down-Regulated	GEO Database
PLEKHG7	-1.248671667	5.898885833	-7.173719319	0.000179714	0.040180014	1.396827906	Down-Regulated	GEO Database
EFHB	-2.197443333	6.30257	-7.142840849	0.000184634	0.040499622	1.371069918	Down-Regulated	GEO Database
L1CAM	-1.1527	10.89158333	-7.134756075	0.000185947	0.040499622	1.364306919	Down-Regulated	GEO Database
UBE2V1	-1.119706667	8.08113	-7.109499907	0.000190118	0.040833555	1.343129173	Down-Regulated	GEO Database
ATF6B	-1.287553333	6.733076667	-7.091013486	0.000193238	0.041345758	1.327579162	Down-Regulated	GEO Database
ITGA3	-1.057483333	11.20099167	-7.084025028	0.000194432	0.041421307	1.321689983	Down-Regulated	GEO Database
HPGD	-1.472216667	6.145795	-7.0789788	0.0001953	0.041503141	1.31743384	Down-Regulated	GEO Database
COL27A1	-1.00432	8.396816667	-7.042100917	0.000201774	0.042354718	1.286235916	Down-Regulated	GEO Database
ADAM22	-1.597643333	6.161795	-7.033490568	0.00020332	0.042471577	1.278927862	Down-Regulated	GEO Database
CERCAM	-1.229773333	6.439738333	-7.025954876	0.000204684	0.042652742	1.272524486	Down-Regulated	GEO Database
ITM2C	-1.214966667	9.291196667	-7.012295967	0.000207183	0.042899386	1.260900245	Down-Regulated	GEO Database
SERPING1	-1.469083333	7.881408333	-6.992235126	0.000210915	0.043006356	1.243786208	Down-Regulated	GEO Database
SLITRK4	-1.271006667	6.108246667	-6.986650581	0.000211968	0.043006356	1.239013187	Down-Regulated	GEO Database
CPS1	-1.01474	8.278743333	-6.983024832	0.000212654	0.043006356	1.235912261	Down-Regulated	GEO Database
HDAC6	-1.938643333	5.236558333	-6.982083785	0.000212833	0.043006356	1.235107164	Down-Regulated	GEO Database
SEMA4F	-1.34294	6.894666667	-6.98176681	0.000212893	0.043006356	1.234835957	Down-Regulated	GEO Database
FKBP9	-1.106066667	9.26541	-6.938780148	0.000221236	0.044279364	1.197941105	Down-Regulated	GEO Database
FMN2	-1.8549	6.603703333	-6.934684563	0.000222049	0.044279364	1.194413976	Down-Regulated	GEO Database
CLYBL	-2.01184	5.88536	-6.900837795	0.000228906	0.044895594	1.165185144	Down-Regulated	GEO Database
KRT19	-1.471596667	8.616601667	-6.882688543	0.00023268	0.044895594	1.149453223	Down-Regulated	GEO Database
UPK1B	-1.12677	8.816701667	-6.874417801	0.000234423	0.044895594	1.142270396	Down-Regulated	GEO Database
EPHB4	-1.01605	6.828688333	-6.856310478	0.000238291	0.04496322	1.126514897	Down-Regulated	GEO Database
DCAKD	-1.452686667	6.19513	-6.797944419	0.000251256	0.046389933	1.075448204	Down-Regulated	GEO Database
KCNJ8	-1.447743333	8.241468333	-6.789307342	0.000253241	0.046556192	1.067854652	Down-Regulated	GEO Database
CNN1	-1.361035	7.3452075	-6.759571215	0.000260211	0.047257773	1.041638594	Down-Regulated	GEO Database
FMO4	-1.105225	6.994099167	-6.754456362	0.000261432	0.047257773	1.037117849	Down-Regulated	GEO Database
TLL2	-1.19916	8.43496	-6.749430873	0.000262637	0.047257773	1.032672831	Down-Regulated	GEO Database
MEI1	-1.159396667	4.521051667	-6.740640745	0.000264761	0.047257773	1.02489024	Down-Regulated	GEO Database
PCDHB13	-1.342173333	5.824276667	-6.738161053	0.000265363	0.047257773	1.022692983	Down-Regulated	GEO Database
WBSCR22	-1.278823333	5.533125	-6.73778201	0.000265455	0.047257773	1.022357044	Down-Regulated	GEO Database
HIST1H2BK	-1.023233333	11.54105	-6.731517847	0.000266985	0.047288066	1.01680255	Down-Regulated	GEO Database
PRR16	-1.0684	6.894033333	-6.73090069	0.000267136	0.047288066	1.01625504	Down-Regulated	GEO Database
KMO	-1.218876667	8.949458333	-6.715595336	0.000270918	0.047595127	1.002661232	Down-Regulated	GEO Database
GEMIN7	-1.073763333	7.721478333	-6.694821111	0.000276147	0.047895621	0.984161898	Down-Regulated	GEO Database
ENO3	-1.133145	7.1758525	-6.670788153	0.000282339	0.048309271	0.96269118	Down-Regulated	GEO Database
AK1	-1.623553333	5.335456667	-6.65106326	0.000287537	0.04835608	0.945013335	Down-Regulated	GEO Database
AMPH	-1.138586667	8.26311	-6.646953274	0.000288634	0.04835608	0.941323524	Down-Regulated	GEO Database
ADAM32	-1.8522	5.309256667	-6.608649585	0.000299083	0.04942068	0.90682991	Down-Regulated	GEO Database
SOCS2	-1.268326667	7.451286667	-6.592524713	0.000303609	0.049792166	0.892251646	Down-Regulated	GEO Database
