# Supplementary material for: Investigating the Molecular Mechanism of Quercetin Protecting against Podocyte Injury to Attenuate Diabetic Nephropathy through Network Pharmacology, MicroarrayData Analysis, and Molecular Docking
Source: Evid Based Complement Alternat Med. 2022 May 16;2022:7291434. doi: 10.1155/2022/7291434 (PMC9126727; doi:10.1155/2022/7291434)
Supplement: Supplementary Materials — Supplementary Table 1: 355 targets of QUE. Supplementary Table 2: 4895 human genes related to DN. Supplementary Table 3: 848 human genes associated with podocyte injury. Supplementary Table 4: 42 mapping targets. Supplementary Table 5: specific analytical parameters of 41 candidate targets. Supplementary Table 6: 118 signaling pathways from R project. Supplementary Table 7: 52 biological functions from R project. [file 7291434.f1.zip › 7291434.f1/Supplementary Table 4-Mapping targets.txt]

Target	Uniprot ID	Description
XDH	P47989	Xanthine dehydrogenase/oxidase [Includes: Xanthine dehydrogenase
STAT1	P42224	Signal transducer and activator of transcription 1-alpha/beta
PTGS2	P35354	Prostaglandin G/H synthase 2
KDR	P35968	Vascular endothelial growth factor receptor 2
IL1A	P01583	Interleukin-1 alpha
IL10	P22301	Interleukin-10
GSK3B	P49841	Glycogen synthase kinase-3 beta
F3	P13726	Tissue factor
CRP	P02741	C-reactive protein [Cleaved into: C-reactive protein
COL3A1	P02461	Collagen alpha-1
AKR1A1	P14550	Aldo-keto reductase family 1 member A1
ADORA1	P30542	Adenosine receptor A1
VEGFA	P15692	armadillo repeat containing 9
PLAT	P00750	cytochrome P450 family 1 subfamily B member 1
NQO1	P15559	PSMC3 interacting protein
IL1B	P01584	potassium voltage-gated channel subfamily J member 8
IGFBP3	P17936	insulin like growth factor binding protein 3
HMOX1	Q6FH11	C-X-C motif chemokine ligand 2
GSTM2	P28161	TNF alpha induced protein 3
CYP1B1	Q16678	calponin 1
CXCL2	P19875	kynureninase
COL1A1	I3L3H7	collagen type I alpha 1 chain
CA12	O43570	MAPK associated protein 1
TP53	P04637	tumor protein p53
TNF	P01375	tumor necrosis factor
SOD1	P00441	superoxide dismutase 1
SELE	Q5TI75	selectin E
RB1	P06400	RB transcriptional corepressor 1
PTK2	Q05397	protein tyrosine kinase 2
PTEN	P60484	phosphatase and tensin homolog
PRSS1	P07477	serine protease 1
MAPK1	P10911	mitogen-activated protein kinase 1
HIF1A	P01892	hypoxia inducible factor 1 subunit alpha
F2	P16930	coagulation factor II, thrombin
CXCL8	Q9UI36	C-X-C motif chemokine ligand 8
CDK2	Q5JTU8	cyclin dependent kinase 2
CCND1	P24864	cyclin D1
APP	P05067	amyloid beta precursor protein
AKT1	P31749	AKT serine/threonine kinase 1
ABCB1	P08183	ATP binding cassette subfamily B member 1
THBD	P07204	thrombomodulin
JUN	P05412	Jun proto-oncogene, AP-1 transcription factor subunit
