# Supplementary material for: Investigating the Molecular Mechanism of Quercetin Protecting against Podocyte Injury to Attenuate Diabetic Nephropathy through Network Pharmacology, MicroarrayData Analysis, and Molecular Docking
Source: Evid Based Complement Alternat Med. 2022 May 16;2022:7291434. doi: 10.1155/2022/7291434 (PMC9126727; doi:10.1155/2022/7291434)
Supplement: Supplementary Materials — Supplementary Table 1: 355 targets of QUE. Supplementary Table 2: 4895 human genes related to DN. Supplementary Table 3: 848 human genes associated with podocyte injury. Supplementary Table 4: 42 mapping targets. Supplementary Table 5: specific analytical parameters of 41 candidate targets. Supplementary Table 6: 118 signaling pathways from R project. Supplementary Table 7: 52 biological functions from R project. [file 7291434.f1.zip › 7291434.f1/Supplementary Table 5-Candidate targets.txt]

SUID	AverageShortestPathLength	BetweennessCentrality	ClosenessCentrality	ClusteringCoefficient	Degree	degree.layout	Eccentricity	IsSingleNode	name	NeighborhoodConnectivity	NumberOfDirectedEdges	NumberOfUndirectedEdges	PartnerOfMultiEdgedNodePairs	Radiality	selected	SelfLoops	shared name	Stress	TopologicalCoefficient
90	1.15	0.1186769	0.86956522	0.47593583	34	34	2	FALSE	TNF	17.82352941	34	0	0	0.95	FALSE	0	TNF	822	0.44558824
80	1.175	0.05737088	0.85106383	0.52083333	33	33	2	FALSE	VEGFA	18.51515152	33	0	0	0.94166667	FALSE	0	VEGFA	640	0.46287879
77	1.225	0.04185542	0.81632653	0.55268817	31	31	2	FALSE	AKT1	19.16129032	31	0	0	0.925	FALSE	0	AKT1	528	0.47903226
87	1.275	0.06200568	0.78431373	0.55665025	29	29	2	FALSE	TP53	19.13793103	29	0	0	0.90833333	FALSE	0	TP53	624	0.47844828
96	1.3	0.02886166	0.76923077	0.60582011	28	28	2	FALSE	CXCL8	20	28	0	0	0.9	FALSE	0	CXCL8	402	0.5
136	1.3	0.03142018	0.76923077	0.60846561	28	28	2	FALSE	PTGS2	20.17857143	28	0	0	0.9	FALSE	0	PTGS2	428	0.50446429
98	1.325	0.02504076	0.75471698	0.62678063	27	27	2	FALSE	JUN	20.25925926	27	0	0	0.89166667	FALSE	0	JUN	352	0.50648148
89	1.375	0.01824004	0.72727273	0.66333333	25	25	2	FALSE	IL10	21.08	25	0	0	0.875	FALSE	0	IL10	276	0.527
93	1.4	0.02019451	0.71428571	0.64492754	24	24	2	FALSE	IL1B	20.70833333	24	0	0	0.86666667	FALSE	0	IL1B	292	0.51770833
99	1.4	0.01769492	0.71428571	0.67028986	24	24	2	FALSE	MAPK1	21.125	24	0	0	0.86666667	FALSE	0	MAPK1	262	0.528125
73	1.475	0.01251421	0.6779661	0.67099567	22	22	3	FALSE	CCND1	20.54545455	22	0	0	0.84166667	FALSE	0	CCND1	180	0.52680653
132	1.475	0.02092797	0.6779661	0.6952381	21	21	2	FALSE	HMOX1	22.04761905	21	0	0	0.84166667	FALSE	0	HMOX1	348	0.55119048
140	1.5	0.01287571	0.66666667	0.7	21	21	3	FALSE	STAT1	21.61904762	21	0	0	0.83333333	FALSE	0	STAT1	176	0.55433455
160	1.475	0.05972487	0.6779661	0.63333333	21	21	2	FALSE	APP	20.9047619	21	0	0	0.84166667	FALSE	0	APP	490	0.53479853
81	1.525	0.00704885	0.6557377	0.76842105	20	20	3	FALSE	KDR	22.9	20	0	0	0.825	FALSE	0	KDR	110	0.58717949
86	1.55	0.00755916	0.64516129	0.73157895	20	20	3	FALSE	PTEN	21.45	20	0	0	0.81666667	FALSE	0	PTEN	106	0.56447368
189	1.5	0.00870957	0.66666667	0.73157895	20	20	2	FALSE	CRP	21.8	20	0	0	0.83333333	FALSE	0	CRP	146	0.545
173	1.6	0.00714017	0.625	0.7254902	18	18	3	FALSE	SELE	21.11111111	18	0	0	0.8	FALSE	0	SELE	110	0.55555556
84	1.575	0.01733856	0.63492063	0.69852941	17	17	2	FALSE	F2	21.52941176	17	0	0	0.80833333	FALSE	0	F2	234	0.53823529
101	1.6	0.00278957	0.625	0.86764706	17	17	3	FALSE	HIF1A	24.35294118	17	0	0	0.8	FALSE	0	HIF1A	52	0.62443439
146	1.575	0.03333402	0.63492063	0.63235294	17	17	2	FALSE	SOD1	20.64705882	17	0	0	0.80833333	FALSE	0	SOD1	348	0.51617647
121	1.65	0.01050369	0.60606061	0.71428571	14	14	2	FALSE	IGFBP3	22.64285714	14	0	0	0.78333333	FALSE	0	IGFBP3	76	0.56607143
158	1.675	0.01626401	0.59701493	0.65934066	14	14	3	FALSE	NQO1	21.5	14	0	0	0.775	FALSE	0	NQO1	254	0.55128205
78	1.675	0.00185459	0.59701493	0.87179487	13	13	2	FALSE	GSK3B	24.61538462	13	0	0	0.775	FALSE	0	GSK3B	36	0.61538462
108	1.75	0.00248814	0.57142857	0.79487179	13	13	3	FALSE	PTK2	22.76923077	13	0	0	0.75	FALSE	0	PTK2	34	0.61538462
110	1.725	0.00121817	0.57971014	0.88461538	13	13	3	FALSE	F3	23.07692308	13	0	0	0.75833333	FALSE	0	F3	24	0.60728745
125	1.725	0.00218559	0.57971014	0.84615385	13	13	3	FALSE	CXCL2	23.76923077	13	0	0	0.75833333	FALSE	0	CXCL2	30	0.62550607
153	1.75	0.00224152	0.57142857	0.8030303	12	12	3	FALSE	PLAT	21.08333333	12	0	0	0.75	FALSE	0	PLAT	36	0.55482456
94	1.8	6.95E-04	0.55555556	0.90909091	11	11	3	FALSE	IL1A	23.81818182	11	0	0	0.73333333	FALSE	0	IL1A	12	0.64373464
72	1.8	3.51E-04	0.55555556	0.95555556	10	10	3	FALSE	CDK2	25.1	10	0	0	0.73333333	FALSE	0	CDK2	6	0.66052632
75	1.825	0.0010058	0.54794521	0.86666667	10	10	3	FALSE	RB1	22.3	10	0	0	0.725	FALSE	0	RB1	12	0.6027027
83	1.825	1.92E-04	0.54794521	0.95555556	10	10	3	FALSE	THBD	22.4	10	0	0	0.725	FALSE	0	THBD	4	0.60540541
105	1.8	0.00672114	0.55555556	0.64444444	10	10	3	FALSE	COL1A1	21.3	10	0	0	0.73333333	FALSE	0	COL1A1	40	0.56052632
134	1.775	0.00204891	0.56338028	0.84444444	10	10	3	FALSE	ABCB1	25.2	10	0	0	0.74166667	FALSE	0	ABCB1	30	0.64615385
169	1.825	0.00262548	0.54794521	0.75	8	8	3	FALSE	ADORA1	24.125	8	0	0	0.725	FALSE	0	ADORA1	38	0.63157895
250	1.925	0.00647813	0.51948052	0.46428571	8	8	3	FALSE	CYP1B1	17	8	0	0	0.69166667	FALSE	0	CYP1B1	70	0.49632353
251	2.125	0.00103423	0.47058824	0.6	5	5	3	FALSE	GSTM2	15.4	5	0	0	0.625	FALSE	0	GSTM2	14	0.51333333
104	2.025	0	0.49382716	1	3	3	3	FALSE	COL3A1	19.33333333	3	0	0	0.65833333	FALSE	0	COL3A1	0	0.53703704
348	2.15	0	0.46511628	1	3	3	3	FALSE	AKR1A1	20	3	0	0	0.61666667	FALSE	0	AKR1A1	0	0.64516129
329	2.05	0	0.48780488	1	2	2	3	FALSE	XDH	25.5	2	0	0	0.65	FALSE	0	XDH	0	0.70833333
411	2.45	0	0.40816327	0	1	1	3	FALSE	PRSS1	21	1	0	0	0.51666667	FALSE	0	PRSS1	0	0
