# Supplementary material for: Investigating the Molecular Mechanism of Quercetin Protecting against Podocyte Injury to Attenuate Diabetic Nephropathy through Network Pharmacology, MicroarrayData Analysis, and Molecular Docking
Source: Evid Based Complement Alternat Med. 2022 May 16;2022:7291434. doi: 10.1155/2022/7291434 (PMC9126727; doi:10.1155/2022/7291434)
Supplement: Supplementary Materials — Supplementary Table 1: 355 targets of QUE. Supplementary Table 2: 4895 human genes related to DN. Supplementary Table 3: 848 human genes associated with podocyte injury. Supplementary Table 4: 42 mapping targets. Supplementary Table 5: specific analytical parameters of 41 candidate targets. Supplementary Table 6: 118 signaling pathways from R project. Supplementary Table 7: 52 biological functions from R project. [file 7291434.f1.zip › 7291434.f1/Supplementary Table 6-118 signaling pathways from R project.txt]

ID	Description	GeneRatio	BgRatio	pvalue	p.adjust	qvalue	geneID	Count
hsa04933	AGE-RAGE signaling pathway in diabetic complications	15/40	100/7891	3.66E-19	7.20E-17	2.69E-17	595/207/7422/7056/7124/3553/3552/3576/3725/5594/1281/1277/2152/6772/6401	15
hsa05418	Fluid shear stress and atherosclerosis	15/40	139/7891	6.26E-17	6.17E-15	2.31E-15	207/7422/3791/7056/7157/7124/3553/3552/3725/5747/3162/5327/1728/6401/2946	15
hsa05167	Kaposi sarcoma-associated herpesvirus infection	13/40	186/7891	3.15E-12	2.07E-10	7.73E-11	595/5925/207/2932/7422/7157/3576/3725/5594/3091/2920/5743/6772	13
hsa05165	Human papillomavirus infection	14/40	330/7891	3.30E-10	1.62E-08	6.07E-09	1017/595/5925/207/2932/7422/5728/7157/7124/5594/1277/5747/5743/6772	14
hsa05163	Human cytomegalovirus infection	12/40	225/7891	5.95E-10	2.35E-08	8.77E-09	595/5925/207/2932/7422/7157/7124/3553/3576/5594/5747/5743	12
hsa05215	Prostate cancer	9/40	97/7891	8.78E-10	2.88E-08	1.08E-08	1017/595/5925/207/2932/5728/7157/5594/5327	9
hsa05140	Leishmaniasis	8/40	76/7891	3.05E-09	8.59E-08	3.21E-08	3586/7124/3553/3552/3725/5594/5743/6772	8
hsa04218	Cellular senescence	10/40	160/7891	4.45E-09	1.10E-07	4.10E-08	1017/595/5925/207/5728/7157/3552/3576/5594/3486	10
hsa05135	Yersinia infection	9/40	121/7891	6.37E-09	1.39E-07	5.22E-08	207/2932/3586/7124/3553/3576/3725/5594/5747	9
hsa05225	Hepatocellular carcinoma	10/40	168/7891	7.15E-09	1.41E-07	5.27E-08	595/5925/207/2932/5728/7157/5594/3162/1728/2946	10
hsa05222	Small cell lung cancer	8/40	92/7891	1.42E-08	2.54E-07	9.51E-08	1017/595/5925/207/5728/7157/5747/5743	8
hsa04657	IL-17 signaling pathway	8/40	93/7891	1.55E-08	2.54E-07	9.51E-08	2932/7124/3553/3576/3725/5594/2920/5743	8
hsa05162	Measles	9/40	138/7891	2.03E-08	3.08E-07	1.15E-07	1017/595/207/2932/7157/3553/3552/3725/6772	9
hsa05146	Amoebiasis	8/40	102/7891	3.23E-08	4.54E-07	1.70E-07	3586/7124/3553/3576/1281/1277/5747/2920	8
hsa04510	Focal adhesion	10/40	199/7891	3.64E-08	4.63E-07	1.73E-07	595/207/2932/7422/3791/5728/3725/5594/1277/5747	10
hsa04625	C-type lectin receptor signaling pathway	8/40	104/7891	3.76E-08	4.63E-07	1.73E-07	207/3586/7124/3553/3725/5594/5743/6772	8
hsa05219	Bladder cancer	6/40	41/7891	4.53E-08	5.05E-07	1.89E-07	595/5925/7422/7157/3576/5594	6
hsa05205	Proteoglycans in cancer	10/40	204/7891	4.61E-08	5.05E-07	1.89E-07	595/207/7422/3791/7157/7124/5594/3091/1277/5747	10
hsa05160	Hepatitis C	9/40	155/7891	5.61E-08	5.81E-07	2.17E-07	1017/595/5925/207/2932/7157/7124/5594/6772	9
hsa04668	TNF signaling pathway	8/40	112/7891	6.75E-08	6.65E-07	2.49E-07	207/7124/3553/3725/5594/2920/5743/6401	8
hsa05212	Pancreatic cancer	7/40	75/7891	7.64E-08	7.17E-07	2.68E-07	595/5925/207/7422/7157/5594/6772	7
hsa05161	Hepatitis B	9/40	162/7891	8.22E-08	7.19E-07	2.69E-07	1017/5925/207/7157/7124/3576/3725/5594/6772	9
hsa05133	Pertussis	7/40	76/7891	8.39E-08	7.19E-07	2.69E-07	3586/7124/3553/3552/3576/3725/5594	7
hsa05323	Rheumatoid arthritis	7/40	93/7891	3.41E-07	2.80E-06	1.05E-06	7422/7124/3553/3552/3576/3725/2920	7
hsa05213	Endometrial cancer	6/40	58/7891	3.83E-07	3.02E-06	1.13E-06	595/207/2932/5728/7157/5594	6
hsa04370	VEGF signaling pathway	6/40	59/7891	4.25E-07	3.22E-06	1.20E-06	207/7422/3791/5594/5747/5743	6
hsa01522	Endocrine resistance	7/40	98/7891	4.90E-07	3.57E-06	1.34E-06	595/5925/207/7157/3725/5594/5747	7
hsa05224	Breast cancer	8/40	147/7891	5.57E-07	3.92E-06	1.46E-06	595/5925/207/2932/5728/7157/3725/5594	8
hsa05226	Gastric cancer	8/40	149/7891	6.17E-07	4.19E-06	1.57E-06	1017/595/5925/207/2932/7157/5594/5243	8
hsa05142	Chagas disease (American trypanosomiasis)	7/40	102/7891	6.44E-07	4.23E-06	1.58E-06	207/3586/7124/3553/3576/3725/5594	7
hsa04620	Toll-like receptor signaling pathway	7/40	104/7891	7.35E-07	4.67E-06	1.75E-06	207/7124/3553/3576/3725/5594/6772	7
hsa05321	Inflammatory bowel disease (IBD)	6/40	65/7891	7.61E-07	4.69E-06	1.75E-06	3586/7124/3553/3552/3725/6772	6
hsa04151	PI3K-Akt signaling pathway	11/40	354/7891	9.08E-07	5.42E-06	2.03E-06	1017/595/207/2932/7422/3791/5728/7157/5594/1277/5747	11
hsa05166	Human T-cell leukemia virus 1 infection	9/40	219/7891	1.07E-06	6.21E-06	2.32E-06	1017/595/5925/207/5728/7157/7124/3725/5594	9
hsa05218	Melanoma	6/40	72/7891	1.40E-06	7.90E-06	2.95E-06	595/5925/207/5728/7157/5594	6
hsa05164	Influenza A	8/40	170/7891	1.68E-06	9.20E-06	3.44E-06	207/7124/3553/3552/3576/5594/6772/5644	8
hsa05214	Glioma	6/40	75/7891	1.79E-06	9.51E-06	3.56E-06	595/5925/207/5728/7157/5594	6
hsa04919	Thyroid hormone signaling pathway	7/40	119/7891	1.83E-06	9.51E-06	3.56E-06	595/207/2932/7157/5594/3091/6772	7
hsa01521	EGFR tyrosine kinase inhibitor resistance	6/40	79/7891	2.43E-06	1.23E-05	4.59E-06	207/2932/7422/3791/5728/5594	6
hsa04380	Osteoclast differentiation	7/40	128/7891	2.99E-06	1.46E-05	5.45E-06	207/7124/3553/3552/3725/5594/6772	7
hsa05132	Salmonella infection	6/40	82/7891	3.03E-06	1.46E-05	5.45E-06	3553/3552/3576/3725/5594/2920	6
hsa05210	Colorectal cancer	6/40	86/7891	4.01E-06	1.88E-05	7.03E-06	595/207/2932/7157/3725/5594	6
hsa05144	Malaria	5/40	49/7891	4.19E-06	1.92E-05	7.17E-06	3586/7124/3553/3576/6401	5
hsa05235	PD-L1 expression and PD-1 checkpoint pathway in cancer	6/40	89/7891	4.90E-06	2.19E-05	8.20E-06	207/5728/3725/5594/3091/6772	6
hsa05169	Epstein-Barr virus infection	8/40	201/7891	5.89E-06	2.58E-05	9.64E-06	1017/595/5925/207/7157/7124/3725/6772	8
hsa04932	Non-alcoholic fatty liver disease (NAFLD)	7/40	149/7891	8.22E-06	3.52E-05	1.32E-05	207/2932/7124/3553/3552/3576/3725	7
hsa04660	T cell receptor signaling pathway	6/40	103/7891	1.14E-05	4.80E-05	1.79E-05	207/2932/3586/7124/3725/5594	6
hsa04010	MAPK signaling pathway	9/40	295/7891	1.24E-05	5.10E-05	1.91E-05	207/7422/3791/7157/7124/3553/3552/3725/5594	9
hsa05223	Non-small cell lung cancer	5/40	66/7891	1.84E-05	7.29E-05	2.73E-05	595/5925/207/7157/5594	5
hsa05206	MicroRNAs in cancer	9/40	310/7891	1.85E-05	7.29E-05	2.73E-05	595/7422/5728/7157/5594/3162/5243/5743/1545	9
hsa05211	Renal cell carcinoma	5/40	69/7891	2.29E-05	8.68E-05	3.25E-05	207/7422/3725/5594/3091	5
hsa05230	Central carbon metabolism in cancer	5/40	69/7891	2.29E-05	8.68E-05	3.25E-05	207/5728/7157/5594/3091	5
hsa04917	Prolactin signaling pathway	5/40	70/7891	2.46E-05	9.14E-05	3.42E-05	595/207/2932/5594/6772	5
hsa04071	Sphingolipid signaling pathway	6/40	119/7891	2.62E-05	9.31E-05	3.48E-05	207/5728/7157/7124/5594/134	6
hsa04621	NOD-like receptor signaling pathway	7/40	178/7891	2.63E-05	9.31E-05	3.48E-05	7124/3553/3576/3725/5594/2920/6772	7
hsa05020	Prion diseases	4/40	35/7891	2.65E-05	9.31E-05	3.48E-05	3553/3552/5594/6647	4
hsa05152	Tuberculosis	7/40	179/7891	2.72E-05	9.41E-05	3.52E-05	207/3586/7124/3553/3552/5594/6772	7
hsa04115	p53 signaling pathway	5/40	72/7891	2.82E-05	9.58E-05	3.58E-05	1017/595/5728/7157/3486	5
hsa05143	African trypanosomiasis	4/40	37/7891	3.31E-05	0.000110657	4.14E-05	3586/7124/3553/6401	4
hsa05220	Chronic myeloid leukemia	5/40	76/7891	3.67E-05	0.000120488	4.51E-05	595/5925/207/7157/5594	5
hsa04062	Chemokine signaling pathway	7/40	189/7891	3.86E-05	0.000124722	4.66E-05	207/2932/3576/5594/5747/2920/6772	7
hsa04926	Relaxin signaling pathway	6/40	129/7891	4.13E-05	0.000131339	4.91E-05	207/7422/3725/5594/1281/1277	6
hsa04068	FoxO signaling pathway	6/40	131/7891	4.51E-05	0.000140961	5.27E-05	1017/595/207/5728/3586/5594	6
hsa04012	ErbB signaling pathway	5/40	85/7891	6.30E-05	0.000193976	7.26E-05	207/2932/3725/5594/5747	5
hsa04064	NF-kappa B signaling pathway	5/40	102/7891	0.000150251	0.000455377	0.000170325	7124/3553/3576/2920/5743	5
hsa05134	Legionellosis	4/40	56/7891	0.000171954	0.000513256	0.000191974	7124/3553/3576/2920	4
hsa04659	Th17 cell differentiation	5/40	107/7891	0.000188253	0.000553519	0.000207033	3553/3725/5594/3091/6772	5
hsa04066	HIF-1 signaling pathway	5/40	109/7891	0.000205354	0.000594923	0.00022252	207/7422/5594/3091/3162	5
hsa05145	Toxoplasmosis	5/40	112/7891	0.000233202	0.000665809	0.000249033	207/3586/7124/5594/6772	5
hsa04722	Neurotrophin signaling pathway	5/40	119/7891	0.000309357	0.000870618	0.000325639	207/2932/7157/3725/5594	5
hsa04110	Cell cycle	5/40	124/7891	0.000374369	0.001024315	0.000383126	1017/595/5925/2932/7157	5
hsa04611	Platelet activation	5/40	124/7891	0.000374369	0.001024315	0.000383126	207/2147/5594/1281/1277	5
hsa05203	Viral carcinogenesis	6/40	201/7891	0.000472276	0.001274497	0.000476702	1017/595/5925/7157/3725/5594	6
hsa01524	Platinum drug resistance	4/40	73/7891	0.000478938	0.00127501	0.000476894	207/7157/5594/2946	4
hsa04210	Apoptosis	5/40	136/7891	0.000572468	0.001503682	0.000562424	207/7157/7124/3725/5594	5
hsa04610	Complement and coagulation cascades	4/40	79/7891	0.000646841	0.00167668	0.000627131	7056/2147/2152/5327	4
hsa04662	B cell receptor signaling pathway	4/40	82/7891	0.000744802	0.001905532	0.000712729	207/2932/3725/5594	4
hsa05216	Thyroid cancer	3/40	37/7891	0.000832104	0.002101596	0.000786063	595/7157/5594	3
hsa04150	mTOR signaling pathway	5/40	153/7891	0.000976794	0.002435802	0.000911067	207/2932/5728/7124/5594	5
hsa04934	Cushing syndrome	5/40	155/7891	0.001035529	0.002549991	0.000953777	1017/595/5925/2932/5594	5
hsa05332	Graft-versus-host disease	3/40	41/7891	0.001125698	0.002737809	0.001024027	7124/3553/3552	3
hsa04940	Type I diabetes mellitus	3/40	43/7891	0.001294108	0.003109015	0.00116287	7124/3553/3552	3
hsa05231	Choline metabolism in cancer	4/40	98/7891	0.001451166	0.003444333	0.001288289	207/3725/5594/3091	4
hsa04061	Viral protein interaction with cytokine and cytokine receptor	4/40	100/7891	0.001563856	0.003667614	0.001371803	3586/7124/3576/2920	4
hsa05010	Alzheimer disease	5/40	171/7891	0.001604859	0.003719496	0.001391209	2932/7124/3553/5594/351	5
hsa04931	Insulin resistance	4/40	108/7891	0.002076001	0.004755491	0.001778704	207/2932/5728/7124	4
hsa05014	Amyotrophic lateral sclerosis (ALS)	3/40	51/7891	0.002123418	0.0048082	0.001798418	7157/7124/6647	3
hsa05202	Transcriptional misregulation in cancer	5/40	186/7891	0.002322736	0.005199761	0.001944874	7157/3576/5747/3486/5327	5
hsa04923	Regulation of lipolysis in adipocytes	3/40	55/7891	0.002637863	0.005838865	0.00218392	207/5743/134	3
hsa04060	Cytokine-cytokine receptor interaction	6/40	294/7891	0.003350521	0.007333918	0.002743117	3586/7124/3553/3552/3576/2920	6
hsa05170	Human immunodeficiency virus 1 infection	5/40	212/7891	0.004085633	0.008844723	0.003308205	207/7124/3725/5594/5747	5
hsa04137	Mitophagy - animal	3/40	65/7891	0.00424103	0.009081337	0.003396706	7157/3725/3091	3
hsa05221	Acute myeloid leukemia	3/40	66/7891	0.004427492	0.009378666	0.003507917	595/207/5594	3
hsa04664	Fc epsilon RI signaling pathway	3/40	68/7891	0.004815207	0.010047563	0.003758105	207/7124/5594	3
hsa04140	Autophagy - animal	4/40	137/7891	0.004896274	0.010047563	0.003758105	207/5728/5594/3091	4
hsa04371	Apelin signaling pathway	4/40	137/7891	0.004896274	0.010047563	0.003758105	595/207/5594/5327	4
hsa05120	Epithelial cell signaling in Helicobacter pylori infection	3/40	70/7891	0.005222892	0.010607317	0.003967471	3576/3725/2920	3
hsa04072	Phospholipase D signaling pathway	4/40	148/7891	0.006428897	0.012923395	0.004833757	207/2147/3576/5594	4
hsa04921	Oxytocin signaling pathway	4/40	153/7891	0.007220491	0.014368047	0.005374103	595/3725/5594/5743	4
hsa05204	Chemical carcinogenesis	3/40	82/7891	0.008103449	0.015963794	0.005970962	5743/1545/2946	3
hsa04310	Wnt signaling pathway	4/40	160/7891	0.008433739	0.016449966	0.006152806	595/2932/7157/3725	4
hsa04217	Necroptosis	4/40	162/7891	0.008803546	0.016837851	0.006297887	7124/3553/3552/6772	4
hsa04630	JAK-STAT signaling pathway	4/40	162/7891	0.008803546	0.016837851	0.006297887	595/207/3586/6772	4
hsa01523	Antifolate resistance	2/40	31/7891	0.010617849	0.019921107	0.007451122	7124/3553	2
hsa05310	Asthma	2/40	31/7891	0.010617849	0.019921107	0.007451122	3586/7124	2
hsa04658	Th1 and Th2 cell differentiation	3/40	92/7891	0.011097731	0.020625028	0.007714411	3725/5594/6772	3
hsa04974	Protein digestion and absorption	3/40	95/7891	0.012105035	0.02228684	0.008335981	1281/1277/5644	3
hsa04640	Hematopoietic cell lineage	3/40	97/7891	0.01280498	0.023357231	0.008736341	7124/3553/3552	3
hsa04914	Progesterone-mediated oocyte maturation	3/40	99/7891	0.013527794	0.024449316	0.009144815	1017/207/5594	3
hsa05330	Allograft rejection	2/40	38/7891	0.015698545	0.028114667	0.010515772	3586/7124	2
hsa04216	Ferroptosis	2/40	40/7891	0.017307612	0.030717114	0.011489169	7157/3162	2
hsa04726	Serotonergic synapse	3/40	115/7891	0.020144873	0.035433393	0.013253206	5594/5743/351	3
hsa04015	Rap1 signaling pathway	4/40	210/7891	0.02107823	0.036747002	0.013744537	207/7422/3791/5594	4
hsa04024	cAMP signaling pathway	4/40	214/7891	0.022417143	0.038599138	0.014437294	207/3725/5594/134	4
hsa04930	Type II diabetes mellitus	2/40	46/7891	0.022532492	0.038599138	0.014437294	7124/5594	2
hsa04340	Hedgehog signaling pathway	2/40	47/7891	0.023459417	0.039840561	0.014901626	595/2932	2
hsa04913	Ovarian steroidogenesis	2/40	49/7891	0.025359781	0.042699802	0.015971072	5743/1545	2
hsa04014	Ras signaling pathway	4/40	232/7891	0.02908452	0.04855636	0.018161609	207/7422/3791/5594	4
