# Supplementary material for: Investigating the Molecular Mechanism of Quercetin Protecting against Podocyte Injury to Attenuate Diabetic Nephropathy through Network Pharmacology, MicroarrayData Analysis, and Molecular Docking
Source: Evid Based Complement Alternat Med. 2022 May 16;2022:7291434. doi: 10.1155/2022/7291434 (PMC9126727; doi:10.1155/2022/7291434)
Supplement: Supplementary Materials — Supplementary Table 1: 355 targets of QUE. Supplementary Table 2: 4895 human genes related to DN. Supplementary Table 3: 848 human genes associated with podocyte injury. Supplementary Table 4: 42 mapping targets. Supplementary Table 5: specific analytical parameters of 41 candidate targets. Supplementary Table 6: 118 signaling pathways from R project. Supplementary Table 7: 52 biological functions from R project. [file 7291434.f1.zip › 7291434.f1/Supplementary Table 7-52 results of GO term from R project.txt]

ID	Description	GeneRatio	BgRatio	pvalue	p.adjust	qvalue	geneID	Count
GO:0002020	protease binding	7/41	121/16969	1.45E-08	3.23E-06	1.78E-06	2932/5728/7157/7124/1281/1277/2152	7
GO:0070851	growth factor receptor binding	6/41	121/16969	4.25E-07	4.70E-05	2.60E-05	7422/5728/3586/3553/3552/351	6
GO:0005126	cytokine receptor binding	7/41	210/16969	6.33E-07	4.70E-05	2.60E-05	7422/3586/7124/3553/3552/3576/6772	7
GO:0005125	cytokine activity	6/41	154/16969	1.75E-06	9.77E-05	5.40E-05	7422/3586/7124/3553/3552/3576	6
GO:0019902	phosphatase binding	6/41	177/16969	3.93E-06	0.00017526	9.68E-05	207/7157/5594/5747/6772/6647	6
GO:0030545	receptor regulator activity	8/41	425/16969	6.71E-06	0.000249293	0.000137679	7422/2147/3586/7124/3553/3552/3576/351	8
GO:0019903	protein phosphatase binding	5/41	132/16969	1.58E-05	0.000497532	0.000274776	207/7157/5747/6772/6647	5
GO:0016209	antioxidant activity	4/41	65/16969	1.78E-05	0.000497532	0.000274776	5743/6647/1728/2946	4
GO:0035035	histone acetyltransferase binding	3/41	26/16969	3.27E-05	0.000811467	0.000448155	7157/3091/6772	3
GO:0048018	receptor ligand activity	7/41	397/16969	4.12E-05	0.000918024	0.000507004	7422/2147/3586/7124/3553/3552/3576	7
GO:0051721	protein phosphatase 2A binding	3/41	29/16969	4.58E-05	0.000928386	0.000512727	207/7157/6772	3
GO:0044389	ubiquitin-like protein ligase binding	6/41	286/16969	5.96E-05	0.001106783	0.000611252	5925/2932/7157/3725/3091/6772	6
GO:0019838	growth factor binding	4/41	121/16969	0.000203143	0.003484684	0.001924513	3791/1281/1277/3486	4
GO:0005507	copper ion binding	3/41	53/16969	0.000282011	0.004306395	0.002378326	7157/3552/6647	3
GO:0004252	serine-type endopeptidase activity	4/41	133/16969	0.000291726	0.004306395	0.002378326	2147/2152/5327/5644	4
GO:0048407	platelet-derived growth factor binding	2/41	11/16969	0.000308979	0.004306395	0.002378326	1281/1277	2
GO:0005149	interleukin-1 receptor binding	2/41	12/16969	0.000370207	0.004856251	0.002681998	3553/3552	2
GO:0031625	ubiquitin protein ligase binding	5/41	270/16969	0.000460989	0.005711139	0.003154134	5925/2932/7157/3725/3091	5
GO:0005161	platelet-derived growth factor receptor binding	2/41	14/16969	0.000508877	0.005746403	0.003173609	7422/5728	2
GO:0002039	p53 binding	3/41	65/16969	0.000515372	0.005746403	0.003173609	2932/7157/3091	3
GO:0008236	serine-type peptidase activity	4/41	158/16969	0.000560349	0.005950378	0.00328626	2147/2152/5327/5644	4
GO:0017171	serine hydrolase activity	4/41	163/16969	0.000629968	0.006385583	0.003526614	2147/2152/5327/5644	4
GO:0051219	phosphoprotein binding	3/41	76/16969	0.000814326	0.007895423	0.004360465	5925/5594/5327	3
GO:0042826	histone deacetylase binding	3/41	102/16969	0.001904318	0.017337693	0.009575219	595/7157/3091	3
GO:1901681	sulfur compound binding	4/41	221/16969	0.001943688	0.017337693	0.009575219	7422/2147/351/2946	4
GO:0020037	heme binding	3/41	106/16969	0.002125425	0.018229609	0.010067804	3162/5743/1545	3
GO:0031072	heat shock protein binding	3/41	108/16969	0.002241717	0.018340281	0.010128926	3791/3091/134	3
GO:0005164	tumor necrosis factor receptor binding	2/41	30/16969	0.002373751	0.018340281	0.010128926	7124/6772	2
GO:0097718	disordered domain specific binding	2/41	31/16969	0.002533586	0.018340281	0.010128926	5925/7157	2
GO:0001085	RNA polymerase II transcription factor binding	3/41	113/16969	0.002549546	0.018340281	0.010128926	2932/7157/3725	3
GO:0005178	integrin binding	3/41	113/16969	0.002549546	0.018340281	0.010128926	3791/3553/1281	3
GO:0001046	core promoter sequence-specific DNA binding	2/41	32/16969	0.002698368	0.018557574	0.010248932	7157/6772	2
GO:0046906	tetrapyrrole binding	3/41	116/16969	0.002746188	0.018557574	0.010248932	3162/5743/1545	3
GO:0004601	peroxidase activity	2/41	37/16969	0.003595668	0.02358335	0.013024555	5743/2946	2
GO:0051879	Hsp90 protein binding	2/41	38/16969	0.003789641	0.024145429	0.013334978	3791/3091	2
GO:0048037	cofactor binding	5/41	438/16969	0.0039044	0.024185591	0.013357159	3162/5743/1545/2946/7498	5
GO:0004712	protein serine/threonine/tyrosine kinase activity	2/41	40/16969	0.004191916	0.024264675	0.013400835	207/5594	2
GO:0016684	oxidoreductase activity, acting on peroxide as acceptor	2/41	40/16969	0.004191916	0.024264675	0.013400835	5743/2946	2
GO:0016705	oxidoreductase activity, acting on paired donors, with incorporation or reduction of molecular oxygen	3/41	137/16969	0.004385911	0.024264675	0.013400835	3162/5743/1545	3
GO:0030020	extracellular matrix structural constituent conferring tensile strength	2/41	41/16969	0.004400172	0.024264675	0.013400835	1281/1277	2
GO:0000987	proximal promoter sequence-specific DNA binding	5/41	452/16969	0.004461218	0.024264675	0.013400835	5925/7157/3725/3091/6772	5
GO:0001047	core promoter binding	2/41	42/16969	0.004613142	0.024493586	0.013527258	7157/6772	2
GO:0032813	tumor necrosis factor receptor superfamily binding	2/41	45/16969	0.005280111	0.026151312	0.014442783	7124/6772	2
GO:0008083	growth factor activity	3/41	147/16969	0.00533671	0.026151312	0.014442783	7422/2147/3586	3
GO:0035257	nuclear hormone receptor binding	3/41	147/16969	0.00533671	0.026151312	0.014442783	5925/3091/6772	3
GO:0008201	heparin binding	3/41	148/16969	0.005438066	0.026151312	0.014442783	7422/2147/351	3
GO:1990841	promoter-specific chromatin binding	2/41	46/16969	0.005511712	0.026151312	0.014442783	7157/6772	2
GO:0042379	chemokine receptor binding	2/41	47/16969	0.005747913	0.026703846	0.014747935	3576/6772	2
GO:0046982	protein heterodimerization activity	5/41	497/16969	0.006636486	0.030202785	0.01668032	7422/7157/3725/3091/134	5
GO:0004175	endopeptidase activity	4/41	322/16969	0.007416804	0.033078944	0.018268758	2147/2152/5327/5644	4
GO:0051427	hormone receptor binding	3/41	170/16969	0.007966531	0.034834048	0.019238063	5925/3091/6772	3
	body fluid secretion
	fibrinolysis
	negative regulation of endothelial cell proliferation
	positive regulation of angiogenesis
	positive regulation of endothelial cell proliferation
	positive regulation of smooth muscle cell proliferation
	reactive oxygen species biosynthetic process
	regulation of endothelial cell proliferation
	regulation of reactive oxygen species metabolic process
	response to purine-containing compound
